# Supplementary material
Source: publisher site journal article supplement (https://www.dovepress.com/article/367871)
Supplement: Supplementary file 1 [file get_supplementary_file.php]

# Supplementary table1| Ingredients’ parameter

| Herb | MOL ID | Chemical Name | MW | AlogP | Hdon | Hacc | OB (%) | Caco-2 | BBB | DL |
| --- | --- | --- | --- | --- | --- | --- | --- | --- | --- | --- |
| Pinellia ternata (Thunb.) Makino | MOL001755 | 24-Ethylcholest-4-en-3-one | 412.77 | 8.18 | 0 | 1 | 36.08 | 1.46 | 1.22 | 0.76 |
| Pinellia ternata (Thunb.) Makino | MOL002670 | Cavidine | 353.45 | 3.72 | 0 | 5 | 35.64 | 1.08 | 0.63 | 0.81 |
| Pinellia ternata (Thunb.) Makino | MOL002714 | baicalein | 270.25 | 2.33 | 3 | 5 | 33.52 | 0.63 | -0.05 | 0.21 |
| Pinellia ternata (Thunb.) Makino | MOL000358 | beta-sitosterol | 414.79 | 8.08 | 1 | 1 | 36.91 | 1.32 | 0.99 | 0.75 |
| Pinellia ternata (Thunb.) Makino | MOL000449 | Stigmasterol | 412.77 | 7.64 | 1 | 1 | 43.83 | 1.44 | 1 | 0.76 |
| Pinellia ternata (Thunb.) Makino | MOL005030 | gondoic acid | 310.58 | 7.75 | 1 | 2 | 30.7 | 1.2 | 0.8 | 0.2 |
| Pinellia ternata (Thunb.) Makino | MOL000519 | coniferin | 314.41 | 3.16 | 2 | 4 | 31.11 | 0.42 | -0.18 | 0.32 |
| Pinellia ternata (Thunb.) Makino | MOL006936 | 10,13-eicosadienoic | 308.56 | 7.3 | 1 | 2 | 39.99 | 1.22 | 0.82 | 0.2 |
| Pinellia ternata (Thunb.) Makino | MOL006957 | (3S,6S)-3-(benzyl)-6-(4-hydroxybenzyl)piperazine-2,5-quinone | 310.38 | 2.15 | 3 | 5 | 46.89 | 0.41 | -0.33 | 0.27 |
| Pinellia ternata (Thunb.) Makino | MOL003578 | Cycloartenol | 426.8 | 7.55 | 1 | 1 | 38.69 | 1.53 | 1.33 | 0.78 |
| Pinellia ternata (Thunb.) Makino | MOL006967 | beta-D-Ribofuranoside, xanthine-9 | 284.26 | -1.29 | 5 | 9 | 44.72 | -1.21 | -1.84 | 0.21 |
| Citrus reticulata Blanco | MOL000359 | sitosterol | 414.79 | 8.08 | 1 | 1 | 36.91 | 1.32 | 0.87 | 0.75 |
| Citrus reticulata Blanco | MOL004328 | naringenin | 272.27 | 2.3 | 3 | 5 | 59.29 | 0.28 | -0.37 | 0.21 |
| Citrus reticulata Blanco | MOL005100 | 5,7-dihydroxy-2-(3-hydroxy-4-methoxyphenyl)chroman-4-one | 302.3 | 2.28 | 3 | 6 | 47.74 | 0.28 | -0.3 | 0.27 |
| Citrus reticulata Blanco | MOL005815 | Citromitin | 404.45 | 3 | 0 | 8 | 86.9 | 0.88 | 0.16 | 0.51 |
| Citrus reticulata Blanco | MOL005828 | nobiletin | 402.43 | 3.04 | 0 | 8 | 61.67 | 1.05 | -0.08 | 0.52 |
| Citrus aurantium L. | MOL001798 | neohesperidin_qt | 302.3 | 2.28 | 3 | 6 | 71.17 | 0.26 | -0.47 | 0.27 |
| Citrus aurantium L. | MOL013435 | poncimarin | 330.41 | 2.74 | 0 | 5 | 63.62 | 0.66 | 0 | 0.35 |
| Citrus aurantium L. | MOL013436 | isoponcimarin | 330.41 | 2.94 | 0 | 5 | 63.28 | 0.5 | -0.02 | 0.31 |
| Citrus aurantium L. | MOL005828 | nobiletin | 402.43 | 3.04 | 0 | 8 | 61.67 | 1.05 | -0.08 | 0.52 |
| Citrus aurantium L. | MOL004328 | naringenin | 272.27 | 2.3 | 3 | 5 | 59.29 | 0.28 | -0.37 | 0.21 |
| Citrus aurantium L. | MOL013277 | Isosinensetin | 372.4 | 3.06 | 0 | 7 | 51.15 | 1.16 | 0.03 | 0.44 |
| Citrus aurantium L. | MOL009053 | 4-[(2S,3R)-5-[(E)-3-hydroxyprop-1-enyl]-7-methoxy-3-methylol-2,3-dihydrobenzofuran-2-yl]-2-methoxy-phenol | 358.42 | 2.16 | 3 | 6 | 50.76 | 0.03 | -0.98 | 0.39 |
| Citrus aurantium L. | MOL001803 | Sinensetin | 372.4 | 3.06 | 0 | 7 | 50.56 | 1.12 | 0.04 | 0.45 |
| Citrus aurantium L. | MOL005100 | 5,7-dihydroxy-2-(3-hydroxy-4-methoxyphenyl)chroman-4-one | 302.3 | 2.28 | 3 | 6 | 47.74 | 0.28 | -0.3 | 0.27 |
| Citrus aurantium L. | MOL007879 | Tetramethoxyluteolin | 342.37 | 3.07 | 0 | 6 | 43.68 | 0.96 | 0.09 | 0.37 |
| Citrus aurantium L. | MOL013430 | Prangenin | 286.3 | 2.49 | 0 | 5 | 43.6 | 0.8 | 0.29 | 0.29 |
| Citrus aurantium L. | MOL002914 | Eriodyctiol (flavanone) | 288.27 | 2.03 | 4 | 6 | 41.35 | 0.05 | -0.66 | 0.24 |
| Citrus aurantium L. | MOL013279 | 5,7,4'-Trimethylapigenin | 312.34 | 3.09 | 0 | 5 | 39.83 | 1.01 | 0.12 | 0.3 |
| Citrus aurantium L. | MOL005849 | didymin | 286.3 | 2.55 | 2 | 5 | 38.55 | 0.6 | -0.07 | 0.24 |
| Citrus aurantium L. | MOL000006 | luteolin | 286.25 | 2.07 | 4 | 6 | 36.16 | 0.19 | -0.84 | 0.25 |
| Citrus aurantium L. | MOL001941 | Ammidin | 270.3 | 3.65 | 0 | 4 | 34.55 | 1.13 | 0.92 | 0.22 |
| Citrus aurantium L. | MOL013437 | 6-Methoxy aurapten | 328.44 | 5.16 | 0 | 4 | 31.24 | 1.01 | 0.38 | 0.3 |
| Bambusa tuldoides Munro | MOL002049 | Coniferyl Aldehyde | 178.2 | 1.67 | 1 | 3 | 49.26 | 0.82 | 0.58 | 0.05 |
| Bambusa tuldoides Munro | MOL003177 | Syringaldehyde | 182.19 | 1.29 | 1 | 4 | 67.06 | 0.71 | 0.4 | 0.05 |
| Poria cocos（Schw.）Wolf | MOL000273 | (2R)-2-[(3S,5R,10S,13R,14R,16R,17R)-3,16-dihydroxy-4,4,10,13,14-pentamethyl-2,3,5,6,12,15,16,17-octahydro-1H-cyclopenta[a]phenanthren-17-yl]-6-methylhept-5-enoic acid | 470.76 | 5.41 | 3 | 4 | 30.93 | 0.01 | -0.76 | 0.81 |
| Poria cocos（Schw.）Wolf | MOL000275 | trametenolic acid | 456.78 | 7.03 | 2 | 3 | 38.71 | 0.52 | -0.14 | 0.8 |
| Poria cocos（Schw.）Wolf | MOL000279 | Cerevisterol | 430.74 | 5.15 | 3 | 3 | 37.96 | 0.28 | -0.39 | 0.77 |
| Poria cocos（Schw.）Wolf | MOL000282 | ergosta-7,22E-dien-3beta-ol | 398.74 | 7.18 | 1 | 1 | 43.51 | 1.32 | 0.91 | 0.72 |
| Poria cocos（Schw.）Wolf | MOL000283 | Ergosterol peroxide | 430.74 | 7.17 | 1 | 3 | 40.36 | 0.84 | 0.34 | 0.81 |
| Poria cocos（Schw.）Wolf | MOL000296 | hederagenin | 414.79 | 8.08 | 1 | 1 | 36.91 | 1.32 | 0.96 | 0.75 |
| Zingiber officinale Roscoe | MOL000358 | beta-sitosterol | 414.79 | 8.08 | 1 | 1 | 36.91 | 1.32 | 0.99 | 0.75 |
| Zingiber officinale Roscoe | MOL006129 | 6-methylgingediacetate2 | 394.56 | 4.55 | 0 | 6 | 48.73 | 0.55 | -0.16 | 0.32 |
| Zingiber officinale Roscoe | MOL000449 | Stigmasterol | 412.77 | 7.64 | 1 | 1 | 43.83 | 1.44 | 1 | 0.76 |
| Zingiber officinale Roscoe | MOL001771 | poriferast-5-en-3beta-ol | 414.79 | 8.08 | 1 | 1 | 36.91 | 1.45 | 1.14 | 0.75 |
| Ziziphus jujuba Mill. | MOL000358 | beta-sitosterol | 414.79 | 8.08 | 1 | 1 | 36.91 | 1.32 | 0.99 | 0.75 |
| Ziziphus jujuba Mill. | MOL004350 | Ruvoside_qt | 390.57 | 2.29 | 3 | 5 | 36.12 | -0.31 | -1.13 | 0.76 |
| Ziziphus jujuba Mill. | MOL000492 | (+)-catechin | 290.29 | 1.92 | 5 | 6 | 54.83 | -0.03 | -0.73 | 0.24 |
| Ziziphus jujuba Mill. | MOL000627 | Stepholidine | 327.41 | 3.1 | 2 | 5 | 33.11 | 0.83 | 0.29 | 0.54 |
| Ziziphus jujuba Mill. | MOL007213 | Nuciferin | 295.41 | 3.57 | 0 | 3 | 34.43 | 1.22 | 0.83 | 0.4 |
| Ziziphus jujuba Mill. | MOL000787 | Fumarine | 353.4 | 2.95 | 0 | 6 | 59.26 | 0.56 | -0.13 | 0.83 |
| Ziziphus jujuba Mill. | MOL002773 | beta-carotene | 536.96 | 12 | 0 | 0 | 37.18 | 2.25 | 1.52 | 0.58 |
| Ziziphus jujuba Mill. | MOL000096 | (-)-catechin | 290.29 | 1.92 | 5 | 6 | 49.68 | -0.03 | -0.78 | 0.24 |
| Ziziphus jujuba Mill. | MOL000098 | quercetin | 302.25 | 1.5 | 5 | 7 | 46.43 | 0.05 | -0.77 | 0.28 |
| Glycyrrhiza uralensis Fisch. ex DC. | MOL001484 | Inermine | 284.28 | 2.44 | 1 | 5 | 75.18 | 0.89 | 0.4 | 0.54 |
| Glycyrrhiza uralensis Fisch. ex DC. | MOL001792 | DFV | 256.27 | 2.57 | 2 | 4 | 32.76 | 0.51 | -0.29 | 0.18 |
| Glycyrrhiza uralensis Fisch. ex DC. | MOL000211 | Mairin | 456.78 | 6.52 | 2 | 3 | 55.38 | 0.73 | 0.22 | 0.78 |
| Glycyrrhiza uralensis Fisch. ex DC. | MOL002311 | Glycyrol | 366.39 | 4.85 | 2 | 6 | 90.78 | 0.71 | -0.2 | 0.67 |
| Glycyrrhiza uralensis Fisch. ex DC. | MOL000239 | Jaranol | 314.31 | 2.09 | 2 | 6 | 50.83 | 0.61 | -0.22 | 0.29 |
| Glycyrrhiza uralensis Fisch. ex DC. | MOL002565 | Medicarpin | 270.3 | 2.66 | 1 | 4 | 49.22 | 1 | 0.53 | 0.34 |
| Glycyrrhiza uralensis Fisch. ex DC. | MOL000354 | isorhamnetin | 316.28 | 1.76 | 4 | 7 | 49.6 | 0.31 | -0.54 | 0.31 |
| Glycyrrhiza uralensis Fisch. ex DC. | MOL000359 | sitosterol | 414.79 | 8.08 | 1 | 1 | 36.91 | 1.32 | 0.87 | 0.75 |
| Glycyrrhiza uralensis Fisch. ex DC. | MOL003656 | Lupiwighteone | 338.38 | 3.92 | 3 | 5 | 51.64 | 0.68 | -0.23 | 0.37 |
| Glycyrrhiza uralensis Fisch. ex DC. | MOL003896 | 7-Methoxy-2-methyl isoflavone | 266.31 | 3.36 | 0 | 3 | 42.56 | 1.16 | 0.56 | 0.2 |
| Glycyrrhiza uralensis Fisch. ex DC. | MOL000392 | formononetin | 268.28 | 2.58 | 1 | 4 | 69.67 | 0.78 | 0.02 | 0.21 |
| Glycyrrhiza uralensis Fisch. ex DC. | MOL000417 | Calycosin | 284.28 | 2.32 | 2 | 5 | 47.75 | 0.52 | -0.43 | 0.24 |
| Glycyrrhiza uralensis Fisch. ex DC. | MOL000422 | kaempferol | 286.25 | 1.77 | 4 | 6 | 41.88 | 0.26 | -0.55 | 0.24 |
| Glycyrrhiza uralensis Fisch. ex DC. | MOL004328 | naringenin | 272.27 | 2.3 | 3 | 5 | 59.29 | 0.28 | -0.37 | 0.21 |
| Glycyrrhiza uralensis Fisch. ex DC. | MOL004805 | (2S)-2-[4-hydroxy-3-(3-methylbut-2-enyl)phenyl]-8,8-dimethyl-2,3-dihydropyrano[2,3-f]chromen-4-one | 390.51 | 5.48 | 1 | 4 | 31.79 | 1 | 0.25 | 0.72 |
| Glycyrrhiza uralensis Fisch. ex DC. | MOL004806 | euchrenone | 406.56 | 6.35 | 1 | 4 | 30.29 | 1.09 | 0.39 | 0.57 |
| Glycyrrhiza uralensis Fisch. ex DC. | MOL004808 | glyasperin B | 370.43 | 4.02 | 3 | 6 | 65.22 | 0.47 | -0.09 | 0.44 |
| Glycyrrhiza uralensis Fisch. ex DC. | MOL004810 | glyasperin F | 354.38 | 2.97 | 3 | 6 | 75.84 | 0.43 | -0.15 | 0.54 |
| Glycyrrhiza uralensis Fisch. ex DC. | MOL004811 | Glyasperin C | 356.45 | 4.73 | 3 | 5 | 45.56 | 0.71 | 0.07 | 0.4 |
| Glycyrrhiza uralensis Fisch. ex DC. | MOL004814 | Isotrifoliol | 298.26 | 2.99 | 2 | 6 | 31.94 | 0.53 | -0.25 | 0.42 |
| Glycyrrhiza uralensis Fisch. ex DC. | MOL004815 | (E)-1-(2,4-dihydroxyphenyl)-3-(2,2-dimethylchromen-6-yl)prop-2-en-1-one | 322.38 | 3.96 | 2 | 4 | 39.62 | 0.66 | -0.12 | 0.35 |
| Glycyrrhiza uralensis Fisch. ex DC. | MOL004820 | kanzonols W | 336.36 | 3.63 | 2 | 5 | 50.48 | 0.63 | 0.04 | 0.52 |
| Glycyrrhiza uralensis Fisch. ex DC. | MOL004824 | (2S)-6-(2,4-dihydroxyphenyl)-2-(2-hydroxypropan-2-yl)-4-methoxy-2,3-dihydrofuro[3,2-g]chromen-7-one | 384.41 | 2.96 | 3 | 7 | 60.25 | 0 | -0.76 | 0.63 |
| Glycyrrhiza uralensis Fisch. ex DC. | MOL004827 | Semilicoisoflavone B | 352.36 | 2.85 | 3 | 6 | 48.78 | 0.45 | -0.33 | 0.55 |
| Glycyrrhiza uralensis Fisch. ex DC. | MOL004828 | Glepidotin A | 338.38 | 3.9 | 3 | 5 | 44.72 | 0.79 | 0.06 | 0.35 |
| Glycyrrhiza uralensis Fisch. ex DC. | MOL004829 | Glepidotin B | 340.4 | 3.88 | 3 | 5 | 64.46 | 0.46 | -0.09 | 0.34 |
| Glycyrrhiza uralensis Fisch. ex DC. | MOL004833 | Phaseolinisoflavan | 324.4 | 3.95 | 2 | 4 | 32.01 | 1.01 | 0.46 | 0.45 |
| Glycyrrhiza uralensis Fisch. ex DC. | MOL004835 | Glypallichalcone | 284.33 | 3.4 | 1 | 4 | 61.6 | 0.76 | 0.23 | 0.19 |
| Glycyrrhiza uralensis Fisch. ex DC. | MOL004838 | 8-(6-hydroxy-2-benzofuranyl)-2,2-dimethyl-5-chromenol | 308.35 | 4.2 | 2 | 4 | 58.44 | 1 | 0.34 | 0.38 |
| Glycyrrhiza uralensis Fisch. ex DC. | MOL004841 | Licochalcone B | 286.3 | 2.88 | 3 | 5 | 76.76 | 0.47 | -0.46 | 0.19 |
| Glycyrrhiza uralensis Fisch. ex DC. | MOL004848 | licochalcone G | 354.43 | 4.35 | 3 | 5 | 49.25 | 0.64 | -0.04 | 0.32 |
| Glycyrrhiza uralensis Fisch. ex DC. | MOL004849 | 3-(2,4-dihydroxyphenyl)-8-(1,1-dimethylprop-2-enyl)-7-hydroxy-5-methoxy-coumarin | 368.41 | 4.03 | 3 | 6 | 59.62 | 0.4 | -0.23 | 0.43 |
| Glycyrrhiza uralensis Fisch. ex DC. | MOL004855 | Licoricone | 382.44 | 4.16 | 2 | 6 | 63.58 | 0.53 | -0.14 | 0.47 |
| Glycyrrhiza uralensis Fisch. ex DC. | MOL004856 | Gancaonin A | 352.41 | 4.17 | 2 | 5 | 51.08 | 0.8 | 0.13 | 0.4 |
| Glycyrrhiza uralensis Fisch. ex DC. | MOL004857 | Gancaonin B | 368.41 | 3.91 | 3 | 6 | 48.79 | 0.58 | -0.1 | 0.45 |
| Glycyrrhiza uralensis Fisch. ex DC. | MOL004860 | licorice glycoside E | 693.71 | 1.59 | 7 | 14 | 32.89 | -2.06 | -2.8 | 0.27 |
| Glycyrrhiza uralensis Fisch. ex DC. | MOL004863 | 3-(3,4-dihydroxyphenyl)-5,7-dihydroxy-8-(3-methylbut-2-enyl)chromone | 354.38 | 3.65 | 4 | 6 | 66.37 | 0.52 | -0.13 | 0.41 |
| Glycyrrhiza uralensis Fisch. ex DC. | MOL004864 | 5,7-dihydroxy-3-(4-methoxyphenyl)-8-(3-methylbut-2-enyl)chromone | 352.41 | 4.17 | 2 | 5 | 30.49 | 0.9 | 0.21 | 0.41 |
| Glycyrrhiza uralensis Fisch. ex DC. | MOL004866 | 2-(3,4-dihydroxyphenyl)-5,7-dihydroxy-6-(3-methylbut-2-enyl)chromone | 354.38 | 3.92 | 4 | 6 | 44.15 | 0.48 | -0.28 | 0.41 |
| Glycyrrhiza uralensis Fisch. ex DC. | MOL004879 | Glycyrin | 382.44 | 4.67 | 2 | 6 | 52.61 | 0.59 | -0.13 | 0.47 |
| Glycyrrhiza uralensis Fisch. ex DC. | MOL004882 | Licocoumarone | 340.4 | 4.98 | 3 | 5 | 33.21 | 0.84 | 0.06 | 0.36 |
| Glycyrrhiza uralensis Fisch. ex DC. | MOL004883 | Licoisoflavone | 354.38 | 3.65 | 4 | 6 | 41.61 | 0.37 | -0.27 | 0.42 |
| Glycyrrhiza uralensis Fisch. ex DC. | MOL004884 | Licoisoflavone B | 352.36 | 2.85 | 3 | 6 | 38.93 | 0.46 | -0.18 | 0.55 |
| Glycyrrhiza uralensis Fisch. ex DC. | MOL004885 | licoisoflavanone | 354.38 | 2.97 | 3 | 6 | 52.47 | 0.39 | -0.22 | 0.54 |
| Glycyrrhiza uralensis Fisch. ex DC. | MOL004891 | shinpterocarpin | 322.38 | 3.46 | 1 | 4 | 80.3 | 1.1 | 0.68 | 0.73 |
| Glycyrrhiza uralensis Fisch. ex DC. | MOL004898 | (E)-3-[3,4-dihydroxy-5-(3-methylbut-2-enyl)phenyl]-1-(2,4-dihydroxyphenyl)prop-2-en-1-one | 340.4 | 4.49 | 4 | 5 | 46.27 | 0.41 | -0.4 | 0.31 |
| Glycyrrhiza uralensis Fisch. ex DC. | MOL004903 | liquiritin | 418.43 | 0.66 | 5 | 9 | 65.69 | -1.06 | -1.93 | 0.74 |
| Glycyrrhiza uralensis Fisch. ex DC. | MOL004904 | licopyranocoumarin | 384.41 | 3.04 | 3 | 7 | 80.36 | 0.13 | -0.62 | 0.65 |
| Glycyrrhiza uralensis Fisch. ex DC. | MOL004905 | 3,22-Dihydroxy-11-oxo-delta(12)-oleanene-27-alpha-methoxycarbonyl-29-oic acid | 512.75 | 4.37 | 1 | 6 | 34.32 | -0.06 | -0.75 | 0.55 |
| Glycyrrhiza uralensis Fisch. ex DC. | MOL004907 | Glyzaglabrin | 298.26 | 2.1 | 2 | 6 | 61.07 | 0.34 | -0.2 | 0.35 |
| Glycyrrhiza uralensis Fisch. ex DC. | MOL004908 | Glabridin | 324.4 | 3.95 | 2 | 4 | 53.25 | 0.97 | 0.36 | 0.47 |
| Glycyrrhiza uralensis Fisch. ex DC. | MOL004910 | Glabranin | 324.4 | 4.42 | 2 | 4 | 52.9 | 0.97 | 0.31 | 0.31 |
| Glycyrrhiza uralensis Fisch. ex DC. | MOL004911 | Glabrene | 322.38 | 3.77 | 2 | 4 | 46.27 | 0.99 | 0.04 | 0.44 |
| Glycyrrhiza uralensis Fisch. ex DC. | MOL004912 | Glabrone | 336.36 | 3.12 | 2 | 5 | 52.51 | 0.59 | -0.11 | 0.5 |
| Glycyrrhiza uralensis Fisch. ex DC. | MOL004913 | 1,3-dihydroxy-9-methoxy-6-benzofurano[3,2-c]chromenone | 298.26 | 2.99 | 2 | 6 | 48.14 | 0.48 | -0.19 | 0.43 |
| Glycyrrhiza uralensis Fisch. ex DC. | MOL004914 | 1,3-dihydroxy-8,9-dimethoxy-6-benzofurano[3,2-c]chromenone | 328.29 | 2.98 | 2 | 7 | 62.9 | 0.4 | -0.34 | 0.53 |
| Glycyrrhiza uralensis Fisch. ex DC. | MOL004915 | Eurycarpin A | 338.38 | 3.92 | 3 | 5 | 43.28 | 0.43 | -0.06 | 0.37 |
| Glycyrrhiza uralensis Fisch. ex DC. | MOL004917 | glycyroside | 562.57 | -0.73 | 6 | 13 | 37.25 | -1.58 | -2.56 | 0.79 |
| Glycyrrhiza uralensis Fisch. ex DC. | MOL004924 | (-)-Medicocarpin | 432.46 | 0.75 | 4 | 9 | 40.99 | -0.6 | -1.34 | 0.95 |
| Glycyrrhiza uralensis Fisch. ex DC. | MOL004935 | Sigmoidin-B | 356.4 | 3.89 | 4 | 6 | 34.88 | 0.42 | -0.41 | 0.41 |
| Glycyrrhiza uralensis Fisch. ex DC. | MOL004941 | (2R)-7-hydroxy-2-(4-hydroxyphenyl)chroman-4-one | 256.27 | 2.57 | 2 | 4 | 71.12 | 0.41 | -0.25 | 0.18 |
| Glycyrrhiza uralensis Fisch. ex DC. | MOL004945 | (2S)-7-hydroxy-2-(4-hydroxyphenyl)-8-(3-methylbut-2-enyl)chroman-4-one | 324.4 | 4.42 | 2 | 4 | 36.57 | 0.72 | -0.04 | 0.32 |
| Glycyrrhiza uralensis Fisch. ex DC. | MOL004948 | Isoglycyrol | 366.39 | 4.36 | 1 | 6 | 44.7 | 0.91 | 0.05 | 0.84 |
| Glycyrrhiza uralensis Fisch. ex DC. | MOL004949 | Isolicoflavonol | 354.38 | 3.63 | 4 | 6 | 45.17 | 0.54 | -0.42 | 0.42 |
| Glycyrrhiza uralensis Fisch. ex DC. | MOL004957 | HMO | 268.28 | 2.58 | 1 | 4 | 38.37 | 0.79 | 0.25 | 0.21 |
| Glycyrrhiza uralensis Fisch. ex DC. | MOL004959 | 1-Methoxyphaseollidin | 354.43 | 4.25 | 2 | 5 | 69.98 | 1.01 | 0.48 | 0.64 |
| Glycyrrhiza uralensis Fisch. ex DC. | MOL004961 | Quercetin der. | 330.31 | 1.82 | 3 | 7 | 46.45 | 0.39 | -0.44 | 0.33 |
| Glycyrrhiza uralensis Fisch. ex DC. | MOL004966 | 3'-Hydroxy-4'-O-Methylglabridin | 354.43 | 3.93 | 2 | 5 | 43.71 | 1 | 0.73 | 0.57 |
| Glycyrrhiza uralensis Fisch. ex DC. | MOL000497 | licochalcone a | 338.43 | 4.62 | 2 | 4 | 40.79 | 0.82 | -0.21 | 0.29 |
| Glycyrrhiza uralensis Fisch. ex DC. | MOL004974 | 3'-Methoxyglabridin | 354.43 | 3.93 | 2 | 5 | 46.16 | 0.94 | 0.47 | 0.57 |
| Glycyrrhiza uralensis Fisch. ex DC. | MOL004978 | 2-[(3R)-8,8-dimethyl-3,4-dihydro-2H-pyrano[6,5-f]chromen-3-yl]-5-methoxyphenol | 338.43 | 4.2 | 1 | 4 | 36.21 | 1.12 | 0.61 | 0.52 |
| Glycyrrhiza uralensis Fisch. ex DC. | MOL004980 | Inflacoumarin A | 322.38 | 4.7 | 2 | 4 | 39.71 | 0.73 | -0.24 | 0.33 |
| Glycyrrhiza uralensis Fisch. ex DC. | MOL004985 | icos-5-enoic acid | 310.58 | 7.75 | 1 | 2 | 30.7 | 1.22 | 1.09 | 0.2 |
| Glycyrrhiza uralensis Fisch. ex DC. | MOL004988 | Kanzonol F | 420.54 | 5.3 | 1 | 5 | 32.47 | 1.18 | 0.56 | 0.89 |
| Glycyrrhiza uralensis Fisch. ex DC. | MOL004989 | 6-prenylated eriodictyol | 356.4 | 3.89 | 4 | 6 | 39.22 | 0.4 | -0.29 | 0.41 |
| Glycyrrhiza uralensis Fisch. ex DC. | MOL004990 | 7,2',4'-trihydroxy－5-methoxy-3－arylcoumarin | 300.28 | 2.56 | 3 | 6 | 83.71 | 0.24 | -0.59 | 0.27 |
| Glycyrrhiza uralensis Fisch. ex DC. | MOL004991 | 7-Acetoxy-2-methylisoflavone | 294.32 | 3.15 | 0 | 4 | 38.92 | 0.74 | 0.16 | 0.26 |
| Glycyrrhiza uralensis Fisch. ex DC. | MOL004993 | 8-prenylated eriodictyol | 356.4 | 3.89 | 4 | 6 | 53.79 | 0.43 | -0.44 | 0.4 |
| Glycyrrhiza uralensis Fisch. ex DC. | MOL004996 | gadelaidic acid | 310.58 | 7.75 | 1 | 2 | 30.7 | 1.2 | 0.94 | 0.2 |
| Glycyrrhiza uralensis Fisch. ex DC. | MOL000500 | Vestitol | 272.32 | 3.15 | 2 | 4 | 74.66 | 0.86 | 0.3 | 0.21 |
| Glycyrrhiza uralensis Fisch. ex DC. | MOL005000 | Gancaonin G | 352.41 | 4.17 | 2 | 5 | 60.44 | 0.78 | 0.23 | 0.39 |
| Glycyrrhiza uralensis Fisch. ex DC. | MOL005001 | Gancaonin H | 420.49 | 4.71 | 3 | 6 | 50.1 | 0.6 | -0.14 | 0.78 |
| Glycyrrhiza uralensis Fisch. ex DC. | MOL005003 | Licoagrocarpin | 338.43 | 4.51 | 1 | 4 | 58.81 | 1.23 | 0.61 | 0.58 |
| Glycyrrhiza uralensis Fisch. ex DC. | MOL005007 | Glyasperins M | 368.41 | 3.22 | 2 | 6 | 72.67 | 0.49 | -0.04 | 0.59 |
| Glycyrrhiza uralensis Fisch. ex DC. | MOL005008 | Glycyrrhiza uralensis Fisch. ex DC. flavonol A | 370.38 | 2.17 | 4 | 7 | 41.28 | -0.09 | -0.81 | 0.6 |
| Glycyrrhiza uralensis Fisch. ex DC. | MOL005012 | Licoagroisoflavone | 336.36 | 3.48 | 2 | 5 | 57.28 | 0.71 | 0.09 | 0.49 |
| Glycyrrhiza uralensis Fisch. ex DC. | MOL005013 | 18α-hydroxyglycyrrhetic acid | 486.76 | 4.55 | 3 | 5 | 41.16 | -0.29 | -0.78 | 0.71 |
| Glycyrrhiza uralensis Fisch. ex DC. | MOL005016 | Odoratin | 314.31 | 2.3 | 2 | 6 | 49.95 | 0.42 | -0.24 | 0.3 |
| Glycyrrhiza uralensis Fisch. ex DC. | MOL005017 | Phaseol | 336.36 | 4.87 | 2 | 5 | 78.77 | 0.76 | -0.06 | 0.58 |
| Glycyrrhiza uralensis Fisch. ex DC. | MOL005018 | Xambioona | 388.49 | 4.68 | 0 | 4 | 54.85 | 1.09 | 0.52 | 0.87 |
| Glycyrrhiza uralensis Fisch. ex DC. | MOL005020 | dehydroglyasperins C | 340.4 | 4.3 | 4 | 5 | 53.82 | 0.68 | -0.12 | 0.37 |
| Glycyrrhiza uralensis Fisch. ex DC. | MOL000098 | quercetin | 302.25 | 1.5 | 5 | 7 | 46.43 | 0.05 | -0.77 | 0.28 |

# Supplementary table2| Targets of Wendan Decoction

| Pinellia ternata (Thunb.) Makino | Citrus reticulata Blanco | Citrus aurantium L. | Bambusa tuldoides | Poria cocos（Schw.）Wolf | Zingiber officinale Roscoe | Ziziphus jujuba Mill. | Glycyrrhiza uralensis Fisch. ex DC. | Wendan Decoction |
| --- | --- | --- | --- | --- | --- | --- | --- | --- |
| PGR | PGR | NOS2 | PTGS1 | NR3C2 | PGR | PGR | PTGS1 | PGR |
| NR3C2 | NCOA2 | PTGS1 | PTGS2 | NCOA2 | NCOA2 | NCOA2 | CHRM3 | NR3C2 |
| PTGS1 | NR3C2 | KCNH2 | ADRA2A | PGR | PTGS1 | KCNH2 | SCN5A | PTGS1 |
| CHRM3 | PTGS1 | ESR1 | SLC6A3 | CHRM3 | PTGS2 | CHRM3 | PTGS2 | CHRM3 |
| KCNH2 | ESR1 | AR | ADRB2 | CHRM1 | KCNH2 | CHRM1 | HTR3A | KCNH2 |
| CHRM1 | PTGS2 | SCN5A | MAOB | CHRM2 | CHRM3 | SCN5A | RXRA | CHRM1 |
| ADRB1 | RELA | PPARG | MAOA | ADRA1B | CHRM1 | CHRM4 | ADRA1B | ADRB1 |
| SCN5A | AKT1 | PTGS2 | LTA4H | GABRA1 | SCN5A | ADRA1A | ADRA1D | SCN5A |
| CHRM5 | BCL2 | F7 | CTRB1 | GRIA2 | CHRM4 | CHRM2 | PRSS1 | CHRM5 |
| PTGS2 | MAPK3 | ACHE | SLC6A2 | ADH1B | ADRA1A | ADRA1B | CHRM1 | PTGS2 |
| HTR3A | MAPK1 | ADRB2 | ADRA2C | ADH1C | CHRM2 | ADRB2 | ADRB2 | HTR3A |
| ADRA2C | CASP3 | ESR2 | ADRA1B | LYZ | ADRA1B | CHRNA2 | OPRM1 | ADRA2C |
| CHRM4 | FASN | CHEK1 | GABRA1 | PTGS1 | ADRB2 | SLC6A4 | ESR1 | CHRM4 |
| RXRA | LDLR | PRSS1 | ADRA1D | SCN5A | CHRNA2 | OPRM1 | MAOB | RXRA |
| OPRD1 | SOD1 | NCOA2 | GRIA2 | PTGS2 | SLC6A4 | GABRA1 | SLC6A4 | OPRD1 |
| ADRA1B | CAT | NCOA1 | APP | RXRA | OPRM1 | BCL2 | PKIA | ADRA1B |
| ADRB2 | PPARG | ADRA2C | APLP2 | SLC6A2 | GABRA1 | BAX | PGR | ADRB2 |
| ADRA1D | MTTP | ADRA1B | CA1 | NR3C2 | BCL2 | CASP9 | NOS2 | ADRA1D |
| OPRM1 | APOB | CHRM3 | CA2 | NCOA2 | BAX | JUN | PPARG | OPRM1 |
| RXRB | PLB1 | CHRM1 | CA3 | PGR | CASP9 | CASP3 | KDR | RXRB |
| SLC6A4 | HMGCR | RXRA | CA5A | CHRM3 | JUN | CASP8 | MAPK14 | SLC6A4 |
| F7 | GSTP1 | GABRA1 | CA7 | CHRM1 | CASP3 | PRKCA | GSK3B | F7 |
| PDE10A | UGT1A1 | MAOB | CA9 | CHRM2 | CASP8 | MAP2 | CHEK1 | PDE10A |
| AR | PPARA | PYGM | CA13 | ADRA1B | PRKCA | NR3C2 | CCNA2 | AR |
| PRSS1 | SREBF1 | RELA | CA5B | GABRA1 | PON1 | NCOA1 | AR | PRSS1 |
| NCOA2 | GSR | AKT1 | CA6 | GRIA2 | MAP2 | ESR1 | ESR2 | NCOA2 |
| NCOA1 | ABCC1 | BCL2 | CA12 | ADH1B | ESR1 | RXRA | NCOA2 | NCOA1 |
| RELA | ADIPOQ | MAPK3 | CA14 | ADH1C | NR3C2 | CAT | CHRM5 | RELA |
| AKT1 | SOAT2 | MAPK1 | MAPT | LYZ | ADH1C | HAS2 | CHRM4 | AKT1 |
| VEGFA | AKR1C1 | CASP3 | COMT | PTGS1 | RXRA | DRD5 | ADRA1A | VEGFA |
| BCL2 | GOT1 | FASN | TDP1 | SCN5A | NCOA1 | CHRM5 | CHRM2 | BCL2 |
| FOS | ABAT | LDLR | CA4 | PTGS2 | ADRA2A | ADRA2C | SLC6A3 | FOS |
| BAX | CES1 | SOD1 | AKR1C3 | RXRA | SLC6A2 | DRD4 | MAPK10 | BAX |
| MMP9 | SOAT1 | CAT | AKR1C4 | SLC6A2 | SLC6A3 | OPRD1 | OPRD1 | MMP9 |
| CASP3 | SCN5A | MTTP | AKR1D1 | POLB | AKR1B1 | ADRA2B | PYGM | CASP3 |
| TP63 | NCOA1 | APOB |  | PTPN2 | PLAU | SLC6A3 | AKR1B1 | TP63 |
| HIF1A | KCNH2 | PLB1 |  | PTPN1 | LTA4H | ADRA1D | NCOA1 | HIF1A |
| FOSL1 | F7 | HMGCR |  | AKR1B10 | MAOB | AR | F7 | FOSL1 |
| FOSL2 | NOS2 | GSTP1 |  | AKR1B1 | MAOA | HTR3A | ACHE | FOSL2 |
| CCNB1 | AR | UGT1A1 |  | AKR1B15 | CTRB1 | ACHE | GABRA1 | CCNB1 |
| MPO | ESR2 | PPARA |  | AKR1A1 | ADRB1 | SLC6A2 | GRIA2 | MPO |
| AHR | CHEK1 | SREBF1 |  | AKR1E2 | TDP1 | DRD2 | RELA | AHR |
| IGF2 | PRSS1 | ABCC1 |  | HSD11B1 | AR | F7 | NCF1 | IGF2 |
| CYCS | GSK3B | ADIPOQ |  | HSD11B1L | HMGCR | CACNA1S | OLR1 | CYCS |
| ALOX12 | BAX | SOAT2 |  | PLA2G1B | CYP51A1 | KDR | NR3C2 | ALOX12 |
| NFATC1 | CASP9 | AKR1C1 |  | PTPRF | NR1H2 | VEGFA | ADRB1 | NFATC1 |
| TDRD7 | MMP9 | GOT1 |  | ACP1 | NR1H3 | MMP2 | LTA4H | TDRD7 |
| EGLN1 | JUN | ABAT |  | PTPRD | CYP19A1 | MMP1 | JUN | EGLN1 |
| NOX5 | TP63 | CES1 |  | PTPRS | CYP17A1 | HMOX1 | IL4 | NOX5 |
| APOD | MAPK8 | SOAT1 |  | NR1H2 | LDLR | CYP3A4 | ATP5F1B | APOD |
| ADRA1A | TIMP1 | GSK3B |  | NR1H3 | VLDLR | CYP1A2 | ND6 | ADRA1A |
| CHRM2 | CREB1 | BAX |  | HMGCR | LRP8 | ALB | HSD3B2 | CHRM2 |
| CHRNA2 | PLA2G4A | CASP9 |  | AR | ESR2 | CAV1 | HSD3B1 | CHRNA2 |
| GABRA1 | CD163 | MMP9 |  | CYP51A1 | NPC1L1 | CTNNB1 | SLC6A2 | GABRA1 |
| CASP9 | EPHB2 | JUN |  | TDP1 | RORC | MYC | IKBKB | CASP9 |
| JUN | CYP19A1 | TP63 |  | ESR1 | SREBF2 | CASP7 | AKT1 | JUN |
| CASP8 | CA7 | MAPK8 |  | ESR2 | SHBG | F3 | BCL2 | CASP8 |
| PRKCA | HSD17B1 | TIMP1 |  | CYP17A1 | CYP2C19 | GJA1 | BAX | PRKCA |
| PON1 | CA12 | CREB1 |  | TBXA2R | RORA | MMP10 | TNFSF15 | PON1 |
| MAP2 | SHBG | PLA2G4A |  | SLC6A4 | PTPN1 | FASN | AHSA1 | MAP2 |
| ADH1C | CA4 | CD163 |  | SLC6A3 | BCHE | PPARG | CASP3 | ADH1C |
| ADRA2A | CYP1B1 | EPHB2 |  | CYP19A1 | SERPINA6 | KLF7 | MAPK8 | ADRA2A |
| SLC6A2 | CBR1 | EGFR |  | CHRM4 | VDR | AKR1B1 | MMP1 | SLC6A2 |
| SLC6A3 | CYP51A1 | VEGFA |  | CHRM5 | ACHE | PRSS1 | STAT1 | SLC6A3 |
| AKR1B1 | NPC1L1 | CCND1 |  | NOS3 | G6PD | MMP3 | HMOX1 | AKR1B1 |
| PLAU | NR1H3 | BCL2L1 |  | NOS1 | GLRA1 | MAOB | CYP3A4 | PLAU |
| LTA4H | CYP17A1 | CDKN1A |  | NOS2 | CES2 | RELA | CYP1A2 | LTA4H |
| MAOB | RORC | MMP2 |  | MAPT | PTGER1 | EGFR | CYP1A1 | MAOB |
| MAOA | SREBF2 | IL10 |  | VDR | PTGER2 | BCL2L1 | ICAM1 | MAOA |
| CTRB1 | SLC6A2 | RB1 |  |  | HSD11B1 | FOS | SELE | CTRB1 |
| ESR1 | CYP2C19 | TNFSF15 |  |  | PTGES | CDKN1A | VCAM1 | ESR1 |
| PPARG | RORA | IL6 |  |  | CDC25A | EIF6 | NR1I2 | PPARG |
| CCNA2 | PTPN1 | NFKBIA |  |  | PPARA | PLAU | CYP1B1 | CCNA2 |
| MTAP | BCHE | TOP1 |  |  | PPARD | MMP9 | ALOX5 | MTAP |
| KDM4E | SERPINA6 | MDM2 |  |  | DHCR7 | MAPK1 | HAS2 | KDM4E |
| XDH | SLC6A4 | APP |  |  | SQLE | IL10 | GSTP1 | XDH |
| ALOX15 | CHRM2 | MMP1 |  |  | PTPN6 | EGF | AHR | ALOX15 |
| CDK1 | VDR | PCNA |  |  | NR1I3 | RB1 | PSMD3 | CDK1 |
| GRK6 | ACHE | ERBB2 |  |  | FDFT1 | TNFSF15 | SLC2A4 | GRK6 |
| SRD5A1 | G6PD | HMOX1 |  |  | SIGMAR1 | IL6 | NR1I3 | MAPK3 |
| SRD5A2 | NR1H2 | CASP7 |  |  | NOS2 | AHSA1 | INSR | MAPK1 |
| CYP19A1 | GLRA1 | ICAM1 |  |  | NR3C1 | TP63 | DIO1 | FASN |
| SERPINA6 | CES2 | MCL1 |  |  | PPARG | ELK1 | PPP3CA | LDLR |
| SHBG | PTGER1 | BIRC5 |  |  | CDC25B | NFKBIA | GSTM1 | SOD1 |
| FABP1 | PTGER2 | IL2 |  |  | UGT2B7 | POR | GSTM2 | CAT |
| CYP17A1 | HSD11B1 | CCNB1 |  |  | HSD11B2 | ODC1 | AKR1C3 | MTTP |
| NR3C1 | PTGES | TYR |  |  | POLB | TOP1 | SLPI | APOB |
| NR1I3 | CDC25A | IFNG |  |  | TBXAS1 | SOD1 | MAPK3 | PLB1 |
| NR1I2 | PPARD | IL4 |  |  |  | HIF1A | MAPK1 | HMGCR |
| SIGMAR1 | DHCR7 | TOP2A |  |  |  | RUNX1T1 | FASN | GSTP1 |
| HSD17B3 | SQLE | SLC2A4 |  |  |  | ERBB2 | LDLR | UGT1A1 |
| NPC1L1 | PTPN6 | INSR |  |  |  | ACACA | SOD1 | PPARA |
| ADORA3 | NR1I3 | CD40LG |  |  |  | CYP1A1 | CAT | SREBF1 |
| MAPK3 | FDFT1 | PTGES |  |  |  | ICAM1 | MTTP | GSR |
| CCR5 | SIGMAR1 | NUF2 |  |  |  | IL1B | APOB | ABCC1 |
| CTSD | NR3C1 | ADCY2 |  |  |  | CCL2 | PLB1 | ADIPOQ |
| TRPA1 | CDC25B | MET |  |  |  | SELE | HMGCR | SOAT2 |
| HSD11B1 | UGT2B7 | MAPK14 |  |  |  | VCAM1 | UGT1A1 | AKR1C1 |
| PTPN11 | HSD11B2 | ADRA1D |  |  |  | PTGER3 | PPARA | GOT1 |
| AKR1B10 | POLB | NOX4 |  |  |  | CXCL8 | SREBF1 | ABAT |
| PTPN1 | MAOB | AKR1B1 |  |  |  | PRKCB | GSR | CES1 |
| PTPN2 | ADORA1 | CDK5 |  |  |  | BIRC5 | ABCC1 | SOAT1 |
| BACE1 | ADORA3 | CDK5R1 |  |  |  | DUOX2 | ADIPOQ | NOS2 |
| NOS2 | ABCG2 | XDH |  |  |  | NOS3 | SOAT2 | ESR2 |
| PTGES | TAS2R31 | MAOA |  |  |  | HSPB1 | AKR1C1 | CHEK1 |
| CDC25A | AKR1C3 | FLT3 |  |  |  | SULT1E1 | GOT1 | GSK3B |
| FAAH | PLA2G1B | CA2 |  |  |  | MGAM | ABAT | MAPK8 |
| PRKCH | GRM5 | CDK1 |  |  |  | IL2 | CES1 | TIMP1 |
| ESR2 | MMP12 | CCNB2 |  |  |  | NR1I2 | SOAT1 | CREB1 |
| TRPV1 | SLC5A2 | CCNB3 |  |  |  | CYP1B1 | KCNH2 | PLA2G4A |
| HSD11B2 | MMP13 | ALOX5 |  |  |  | PLAT | RXRB | CD163 |
| CES1 | PLA2G2A | ADORA1 |  |  |  | THBD | STAT3 | EPHB2 |
| ALOX5 | PLA2G5 | CA7 |  |  |  | SERPINE1 | CCND1 | CYP19A1 |
| FNTB | PLA2G10 | GLO1 |  |  |  | COL1A1 | EIF6 | CA7 |
| FNTA | BACE1 | SYK |  |  |  | IFNG | RB1 | HSD17B1 |
| RORA | SERPINE1 | PARP1 |  |  |  | ALOX5 | FOSL2 | CA12 |
| BCHE | KLK1 | TTR |  |  |  | IL1A | MMP3 | SHBG |
| PTPN6 | KLK2 | CA12 |  |  |  | MPO | EGFR | CA4 |
| IDO1 | RXRA | CA4 |  |  |  | TOP2A | VEGFA | CYP1B1 |
| F3 | CHRNA7 | MMP12 |  |  |  | NCF1 | BCL2L1 | CBR1 |
| DRD1 | SRC | CD38 |  |  |  | ABCG2 | FOS | ACHE |
| HTR7 | CA2 | CYP1B1 |  |  |  | GSTP1 | CDKN1A | PYGM |
| DRD2 | CA1 | ABCG2 |  |  |  | NFE2L2 | CASP9 | EGFR |
| HTR1A | CA3 | AKR1B10 |  |  |  | NQO1 | PLAU | CCND1 |
| DRD3 | CA6 | TNKS2 |  |  |  | PARP1 | MMP2 | BCL2L1 |
| DRD4 | CA13 | TNKS |  |  |  | AHR | MMP9 | CDKN1A |
| HTR2A | CA5B | ARG1 |  |  |  | PSMD3 | IL10 | MMP2 |
| DRD5 | CA5A | CYP19A1 |  |  |  | SLC2A4 | EGF | IL10 |
| ADRB3 | KIT | HSD17B1 |  |  |  | COL3A1 | IL6 | RB1 |
| HCRTR1 | KDR | SHBG |  |  |  | CXCL11 | TP63 | TNFSF15 |
| ABCB1 | FGFR1 | CBR1 |  |  |  | CXCL2 | ELK1 | IL6 |
| CDC7 | MET | OPRD1 |  |  |  | DCAF5 | NFKBIA | NFKBIA |
| DHCR7 | NQO2 | KIT |  |  |  | NR1I3 | POR | TOP1 |
| ACHE | HSD17B14 | OPRM1 |  |  |  | INSR | ODC1 | MDM2 |
| CHRNB2 | AKR1B1 | ADORA2A | |  |  | CLDN4 | CASP8 | APP |
| CHRNB4 | NOX4 | ADORA3 |  |  |  | PPARA | TOP1 | MMP1 |
| CHRNA3 | CA9 | TAS2R31 |  |  |  | PPARD | RAF1 | PCNA |
| RBBP9 | IGF1R | AKR1C3 |  |  |  | HSF1 | PRKCA | ERBB2 |
| KCNN1 | INSR | PLA2G1B |  |  |  | CRP | HIF1A | HMOX1 |
| KCNN3 | CLK1 | GRM5 |  |  |  | CXCL10 | RUNX1T1 | CASP7 |
| KCNN2 | DYRK1B | CES2 |  |  |  | CHUK | ERBB2 | ICAM1 |
| RPS6KA3 | CDK5 | SLC5A2 |  |  |  | SPP1 | ACACA | MCL1 |
| RPS6KB1 | CDK5R1 | POLB |  |  |  | RUNX2 | CAV1 | BIRC5 |
| HTR2C | ESRRA | MMP13 |  |  |  | RASSF1 | MYC | IL2 |
| CA12 | ESRRB | PLA2G2A |  |  |  | E2F1 | F3 | TYR |
| PRF1 | HSD17B2 | PLA2G5 |  |  |  | E2F2 | GJA1 | IFNG |
| CCNA1 | EDNRA | PLA2G10 |  |  |  | ACPP | IL1B | IL4 |
| CDK2 | DYRK1A | BACE1 |  |  |  | CTSD | CCL2 | TOP2A |
| PLK1 | SIRT2 | SERPINE1 |  |  |  | IGFBP3 | PTGER3 | SLC2A4 |
| AURKB | IGFBP3 | KLK1 |  |  |  | IGF2 | CXCL8 | INSR |
| AURKA | PTGER4 | KLK2 |  |  |  | CD40LG | PRKCB | CD40LG |
| MTNR1B | PTGER3 | CHRNA7 |  |  |  | IRF1 | BIRC5 | PTGES |
| ADORA1 | PIK3CB | SRC |  |  |  | ERBB3 | DUOX2 | NUF2 |
| SLC1A3 | CYP2C9 | CA1 |  |  |  | DIO1 | NOS3 | ADCY2 |
| CXCR3 | CYP3A4 | CA3 |  |  |  | PCOLCE | HSPB1 | MET |
| MTOR | PIK3CA | CA6 |  |  |  | NPEPPS | SULT1E1 | MAPK14 |
| HTR2B | BCL2L1 | CA13 |  |  |  | HK2 | MGAM | NOX4 |
| XBP1 | F3 | CA5B |  |  |  | RASA1 | IL2 | CDK5 |
| TBXA2R | ADCY5 | CA5A |  |  |  | GSTM1 | CCNB1 | CDK5R1 |
| MARS | PGF | KDR |  |  |  | GSTM2 | PLAT | FLT3 |
| TGFBR1 | VEGFA | FGFR1 |  |  |  | DRD1 | THBD | CA2 |
| SLC18A2 | MMP2 | NQO2 |  |  |  | DRD3 | SERPINE1 | CCNB2 |
| GRIA1 | YWHAG | HSD17B14 | |  |  | CA12 | COL1A1 | CCNB3 |
| NOS1 | CTSL | BCHE |  |  |  | CA1 | IFNG | ALOX5 |
| ALOX5AP | ALOX12 | CA9 |  |  |  | CA2 | IL1A | ADORA1 |
| HCRTR2 | MMP3 | IGF1R |  |  |  | CA3 | MPO | GLO1 |
| ABL1 | APP | CLK1 |  |  |  | CA4 | TOP2A | SYK |
| IMPDH2 | VCP | DYRK1B |  |  |  | CA6 | ABCG2 | PARP1 |
| CCND1 | LCK | ESRRA |  |  |  | CA5A | NFE2L2 | TTR |
| CDK4 | SYK | ESRRB |  |  |  | CA7 | NQO1 | MMP12 |
| CCNE1 | WEE1 | HSD17B2 |  |  |  | CA9 | PARP1 | CD38 |
| CCNE2 | HNF4A | EDNRA |  |  |  | CA13 | COL3A1 | ABCG2 |
| ATR | ABCB1 | DYRK1A |  |  |  | TDP1 | CXCL11 | AKR1B10 |
| PARP2 | OPRD1 | SIRT2 |  |  |  | CA5B | CXCL2 | TNKS2 |
| FLT3 | OPRM1 | IGFBP3 |  |  |  | CA14 | DCAF5 | TNKS |
| MAPK8 | ALOX5 | PTGER1 |  |  |  | BACE1 | CHEK2 | ARG1 |
| TTK | ADORA2A | PTGER4 |  |  |  | BACE2 | CLDN4 | GRIA2 |
| CDK8 |  | PTGER2 |  |  |  | MBNL1 | PPARD | ADH1B |
| CHRNA4 |  | PTGER3 |  |  |  | MBNL2 | HSF1 | LYZ |
| CCNC |  | PIK3CB |  |  |  | MBNL3 | CRP | HAS2 |
| TGFB1 |  | CYP2C9 |  |  |  | SIGMAR1 | CXCL10 | DRD5 |
| MAPKAPK2 | | CYP3A4 |  |  |  | MAOA | CHUK | DRD4 |
| CYP11B1 |  | PIK3CA |  |  |  | HTR1A | SPP1 | ADRA2B |
| CYP11B2 |  | F3 |  |  |  | HTR1B | RUNX2 | DRD2 |
| CDK9 |  | ADCY5 |  |  |  | CHRNA4 | RASSF1 | CACNA1S |
| HPGD |  | PGF |  |  |  | CHRNB2 | E2F1 | KDR |
| MAPK14 |  | YWHAG |  |  |  | DYRK1A | E2F2 | CYP3A4 |
| ITK |  | CTSL |  |  |  | MAPT | ACPP | CYP1A2 |
| GRM5 |  | ALOX12 |  |  |  | HTR7 | CTSD | ALB |
| GRM1 |  | MMP3 |  |  |  | HTR2A | IGFBP3 | CAV1 |
| PIK3CA |  | VCP |  |  |  | HTR1D | IGF2 | CTNNB1 |
| TUBB3 |  | LCK |  |  |  | RBP4 | CD40LG | MYC |
| PGK1 |  | WEE1 |  |  |  | PTPN2 | IRF1 | F3 |
| HDAC2 |  | HNF4A |  |  |  | PTPN1 | ERBB3 | GJA1 |
| SYK |  | MTOR |  |  |  | CYP19A1 | PON1 | MMP10 |
| PRKCE |  | PDE4D |  |  |  | ESR2 | PCOLCE | KLF7 |
| MTNR1A |  | MTNR1A |  |  |  | RARA | NPEPPS | MMP3 |
| CHEK1 |  | MTNR1B |  |  |  | RARB | HK2 | EIF6 |
| CSF1R |  | HTR2C |  |  |  | RARG | RASA1 | EGF |
| ALDH3A1 |  | BRPF1 |  |  |  | MAPK3 | XDH | AHSA1 |
| MET |  | CLK4 |  |  |  | PLA2G1B | CA2 | ELK1 |
| QPCT |  | METAP2 |  |  |  | CDK1 | CA7 | POR |
| SLC27A1 |  | SCN9A |  |  |  | HMGCR | CA12 | ODC1 |
| TBXAS1 |  | PRKCG |  |  |  | CYP51A1 | CA4 | RUNX1T1 |
| FLT1 |  | PRKCQ |  |  |  | NPC1L1 | NOX4 | ACACA |
| HSD17B1 |  | SCN10A |  |  |  | NR1H3 | TYR | CYP1A1 |
| CA7 |  | PRKCA |  |  |  | CYP17A1 | FLT3 | IL1B |
| CA4 |  | CDK2 |  |  |  | RORC | HSD17B2 | CCL2 |
| CYP1B1 |  | PRKCB |  |  |  | SREBF2 | HSD17B1 | SELE |
| CDK5 |  | PRKCD |  |  |  | SHBG | ESRRA | VCAM1 |
| CCNB2 |  | PRKCH |  |  |  | CYP2C19 | ABCB1 | PTGER3 |
| CDK5R1 |  | MAPKAPK2 | |  |  | RORA | CYP19A1 | CXCL8 |
| CA2 |  | PIK3CD |  |  |  | BCHE | SHBG | PRKCB |
| CCNB3 |  | PIK3CG |  |  |  | SERPINA6 | CBR1 | DUOX2 |
| CDK6 |  | PDE10A |  |  |  | VDR | CRYZ | NOS3 |
| CA1 |  | CCKBR |  |  |  | G6PD | ALOX15B | HSPB1 |
| CA9 |  | FPR1 |  |  |  | NR1H2 | ALOX15 | SULT1E1 |
| ABCG2 |  | FPR2 |  |  |  | GLRA1 | ALOX12 | MGAM |
| CBR1 |  | RORC |  |  |  | CES2 | ALOXE3 | NR1I2 |
| ADORA2A | | F10 |  |  |  | PTGER1 | PTPN1 | PLAT |
| PTPRS |  | ENPP2 |  |  |  | PTGER2 | PTPN2 | THBD |
| AMY1A |  | BRD4 |  |  |  | HSD11B1 | ALOX12B | SERPINE1 |
| IKBKB |  | GABRG2 |  |  |  | PTGES | SRC | COL1A1 |
| NTRK2 |  | GABRA5 |  |  |  | CDC25A | FYN | IL1A |
| TTR |  | GABRB3 |  |  |  | DHCR7 | YES1 | NCF1 |
| NOX4 |  | UTS2R |  |  |  | SQLE | FGR | NFE2L2 |
| GSK3B |  | EIF2AK3 |  |  |  | PTPN6 | FRK | NQO1 |
| ABCC1 |  | CDK6 |  |  |  | FDFT1 | AKR1B10 | PSMD3 |
| CSNK2A1 |  | CDK4 |  |  |  | NOS2 | POLB | COL3A1 |
| CFTR |  | LRRK2 |  |  |  | NR3C1 | AKR1B15 | CXCL11 |
| TNKS2 |  | RPS6KA3 |  |  |  | CDC25B | AKR1A1 | CXCL2 |
| TNKS |  | TK2 |  |  |  | UGT2B7 | AKR1E2 | DCAF5 |
| HSD17B2 |  | BRD1 |  |  |  | HSD11B2 | SAE1&UBA2 | NR1I3 |
| TERT |  | TRIM24 |  |  |  | POLB | MAPT | CLDN4 |
| LCK |  | TRPV1 |  |  |  |  | HSD11B1 | PPARD |
| PFKFB3 |  | CCND2 |  |  |  |  | HSD11B1L | HSF1 |
| PIM1 |  | CCND3 |  |  |  |  | NR1H4 | CRP |
| PARP1 |  | DRD4 |  |  |  |  | CDC25A | CXCL10 |
| CALM1 |  | SIGMAR1 |  |  |  |  | CDC25B | CHUK |
| APP |  | ABL1 |  |  |  |  | TOP2B | SPP1 |
| ARG1 |  | JAK1 |  |  |  |  | TDP1 | RUNX2 |
| GLO1 |  | MAP2K1 |  |  |  |  | MBNL1 | RASSF1 |
| MMP2 |  | AVPR2 |  |  |  |  | MBNL2 | E2F1 |
| MMP12 |  | AVPR1A |  |  |  |  | MBNL3 | E2F2 |
| CD38 |  | CCR9 |  |  |  |  | CA9 | ACPP |
| TOP1 |  | PDE4B |  |  |  |  | ADORA1 | CTSD |
| EGFR |  | HSD11B1 |  |  |  |  | ADORA3 | IGFBP3 |
| SRC |  | ACACB |  |  |  |  | DYRK1A | IRF1 |
| NAE1 |  | ADORA2B | |  |  |  | PLG | ERBB3 |
| TYR |  | ERBB4 |  |  |  |  | LPA | DIO1 |
| ESRRA |  | MKNK1 |  |  |  |  | ADORA2A | PCOLCE |
| CYP1A1 |  | AURKB |  |  |  |  | MCL1 | NPEPPS |
| KIT |  | JAK2 |  |  |  |  | FLT1 | HK2 |
| MAPT |  | TYK2 |  |  |  |  | FLT4 | RASA1 |
| TOP2A |  | MKNK2 |  |  |  |  | IGF1R | GSTM1 |
| INSR |  | AURKA |  |  |  |  | AVPR2 | GSTM2 |
| MYLK |  | HCRTR2 |  |  |  |  | MAOA | DRD1 |
| APEX1 |  | HCRTR1 |  |  |  |  | F2 | DRD3 |
| PIK3CG |  | ROCK2 |  |  |  |  | PIM1 | PKIA |
| IGF1R |  | PRKDC |  |  |  |  | AURKB | MAPK10 |
| GPR35 |  | ROCK1 |  |  |  |  | DRD4 | OLR1 |
| KDR |  | JAK3 |  |  |  |  | GLO1 | ATP5F1B |
| ALK |  | EDNRB |  |  |  |  | PIK3R1 | ND6 |
| AXL |  | CFD |  |  |  |  | DAPK1 | HSD3B2 |
| ST6GAL1 |  | SLC6A4 |  |  |  |  | PYGL | HSD3B1 |
| SLC22A12 | | MAPK10 |  |  |  |  | CA1 | IKBKB |
| FYN |  | PTPN1 |  |  |  |  | PTK2 | STAT1 |
| TACR2 |  | PDE9A |  |  |  |  | MMP13 | PPP3CA |
| PRKDC |  | LIPE |  |  |  |  | CA3 | AKR1C3 |
| SIRT1 |  | PDE1C |  |  |  |  | PLK1 | SLPI |
| CA6 |  | CCNA1 |  |  |  |  | CA6 | STAT3 |
| PLA2G2A |  | CCNA2 |  |  |  |  | CDK1 | RAF1 |
| PLA2G4A |  | PSEN1 |  |  |  |  | PKN1 | CHEK2 |
| CXCR1 |  | PSEN2 |  |  |  |  | CA14 | HSD17B2 |
| HMGCR |  | BRS3 |  |  |  |  | CSNK2A1 | ESRRA |
| CYP51A1 |  | GABRA3 |  |  |  |  | MET | ABCB1 |
| NR1H3 |  | GABRA2 |  |  |  |  | NEK2 | CRYZ |
| RORC |  | ELANE |  |  |  |  | CXCR1 | ALOX15B |
| SREBF2 |  | CDK9 |  |  |  |  | CAMK2B | ALOXE3 |
| CYP2C19 |  | GABRA6 |  |  |  |  | ALK | PTPN1 |
| VDR |  | CFTR |  |  |  |  | NEK6 | PTPN2 |
| G6PD |  | DUT |  |  |  |  | PLA2G1B | ALOX12B |
| NR1H2 |  | HDAC1 |  |  |  |  | CA5A | SRC |
| GLRA1 |  | BRD2 |  |  |  |  | BACE1 | FYN |
| CES2 |  | BRD3 |  |  |  |  | AXL | YES1 |
| PTGER1 |  | TTK |  |  |  |  | NUAK1 | FGR |
| PTGER2 |  | PIM1 |  |  |  |  | AKR1C2 | FRK |
| PPARA |  | CAPN2 |  |  |  |  | AKR1C4 | POLB |
| PPARD |  | CAPN1 |  |  |  |  | CA13 | AKR1B15 |
| SQLE |  | CTSB |  |  |  |  | GPR35 | AKR1A1 |
| FDFT1 |  | BACE2 |  |  |  |  | KDM4E | AKR1E2 |
| CDC25B |  | CREBBP |  |  |  |  | MYLK | UBA2 |
| UGT2B7 |  | CDC7 |  |  |  |  | SYK | GABRB2 |
| POLB |  | PLA2G7 |  |  |  |  | PIK3CG | SAE1 |
| SCD |  | ITK |  |  |  |  | APEX1 | MAPT |
| FABP4 |  | MAPK9 |  |  |  |  | CDK5 | HSD11B1 |
| FABP5 |  | PTP4A3 |  |  |  |  | CCNB2 | HSD11B1L |
| FABP3 |  | EPHB4 |  |  |  |  | CDK5R1 | NR1H4 |
| FFAR1 |  | CCNE1 |  |  |  |  | CCNB3 | CDC25A |
| PREP |  | CCNE2 |  |  |  |  | CDK6 | CDC25B |
| PLA2G1B |  | PIM2 |  |  |  |  | CDK2 | TOP2B |
| ACP1 |  | NPY5R |  |  |  |  | ARG1 | TDP1 |
| CNR1 |  | AGTR2 |  |  |  |  | APP | MBNL1 |
| CD81 |  | STK3 |  |  |  |  | TERT | MBNL2 |
| PDE4D |  | CTSK |  |  |  |  | PTPRS | MBNL3 |
| PTPRF |  | CTSS |  |  |  |  | MPG | CA9 |
| LTB4R |  | CTSV |  |  |  |  | SLC22A12 | ADORA3 |
| UBA2 |  | PDE8B |  |  |  |  | TTR | DYRK1A |
| SAE1 |  | TERT |  |  |  |  | MMP12 | PLG |
| PTGIR |  | ALK |  |  |  |  | CD38 | LPA |
| PTGER4 |  | CSNK2A1 |  |  |  |  | TNKS2 | ADORA2A |
| NR1H4 |  | ABCB1 |  |  |  |  | CYP51A1 | FLT1 |
| SLC22A6 |  | PLK1 |  |  |  |  | NPC1L1 | FLT4 |
| ADK |  | GPR35 |  |  |  |  | NR1H3 | IGF1R |
| ADA |  | F2 |  |  |  |  | CYP17A1 | AVPR2 |
| SLC5A2 |  | PFKFB3 |  |  |  |  | RORC | F2 |
| GBA |  | PTK2 |  |  |  |  | SREBF2 | PIM1 |
| HRAS |  | NEK2 |  |  |  |  | CYP2C19 | AURKB |
| IGFBP3 |  | AXL |  |  |  |  | RORA | PIK3R1 |
| TYMP |  | CYP1A1 |  |  |  |  | BCHE | DAPK1 |
| PNP |  | CAMK2B |  |  |  |  | SERPINA6 | PYGL |
| LGALS3 |  | PLG |  |  |  |  | VDR | CA1 |
| LGALS9 |  | APEX1 |  |  |  |  | G6PD | PTK2 |
| MMP1 |  | AKR1C4 |  |  |  |  | NR1H2 | MMP13 |
| MMP7 |  | CA14 |  |  |  |  | GLRA1 | CA3 |
| MMP8 |  | PTPRS |  |  |  |  | CES2 | PLK1 |
| OGA |  | IKBKB |  |  |  |  | PTGER1 | CA6 |
| PYGL |  | ODC1 |  |  |  |  | PTGER2 | PKN1 |
| SLC29A1 |  | PPP5C |  |  |  |  | PTGES | CA14 |
| F2 |  | PDPK1 |  |  |  |  | DHCR7 | CSNK2A1 |
| ADORA2B | | CNR2 |  |  |  |  | SQLE | NEK2 |
|  |  | CYP1A2 |  |  |  |  | PTPN6 | CXCR1 |
|  |  | SIRT3 |  |  |  |  | FDFT1 | CAMK2B |
|  |  | SCD |  |  |  |  | SIGMAR1 | ALK |
|  |  | AMY1A |  |  |  |  | NR3C1 | NEK6 |
|  |  | PYGL |  |  |  |  | UGT2B7 | PLA2G1B |
|  |  | GRK6 |  |  |  |  | HSD11B2 | CA5A |
|  |  | KDM4E |  |  |  |  | PDE5A | BACE1 |
|  |  | MPO |  |  |  |  | TBXAS1 | AXL |
|  |  | PIK3R1 |  |  |  |  | HTR2A | NUAK1 |
|  |  | CXCR1 |  |  |  |  | HTR2C | AKR1C2 |
|  |  | AKR1C2 |  |  |  |  | ESRRB | AKR1C4 |
|  |  | AKR1A1 |  |  |  |  | CCR4 | CA13 |
|  |  | ST6GAL1 |  |  |  |  | ALDH2 | GPR35 |
|  |  | AHR |  |  |  |  | HSP90B1 | MYLK |
|  |  | NAE1 |  |  |  |  | HSP90AA1 | PIK3CG |
|  |  | BMP4 |  |  |  |  | GPR84 | APEX1 |
|  |  | KCNA3 |  |  |  |  | HSP90AB1 | CDK6 |
|  |  | ALPL |  |  |  |  | GCGR | CDK2 |
|  |  | TLR4 |  |  |  |  | SIRT1 | TERT |
|  |  | CCR1 |  |  |  |  | MIF | PTPRS |
|  |  | CCR4 |  |  |  |  | PFKFB3 | MPG |
|  |  | CCR2 |  |  |  |  | PDE10A | SLC22A12 |
|  |  | ITGB7 |  |  |  |  | FNTB | CYP51A1 |
|  |  | HCAR2 |  |  |  |  | FNTA | NPC1L1 |
|  |  | PDE5A |  |  |  |  | TLR9 | NR1H3 |
|  |  | GYS1 |  |  |  |  | TNKS | CYP17A1 |
|  |  | ITGA4 |  |  |  |  | CA5B | RORC |
|  |  | DNMT3A |  |  |  |  | DHODH | SREBF2 |
|  |  | CYP17A1 |  |  |  |  | STS | CYP2C19 |
|  |  | CLK3 |  |  |  |  | ERCC5 | RORA |
|  |  | DYRK2 |  |  |  |  | FEN1 | BCHE |
|  |  | AOC3 |  |  |  |  | DUSP3 | SERPINA6 |
|  |  | NOS1 |  |  |  |  | CDC7 | VDR |
|  |  | FLT1 |  |  |  |  | F10 | G6PD |
|  |  | CXCL8 |  |  |  |  | CFTR | NR1H2 |
|  |  | HRH3 |  |  |  |  | AMY1A | GLRA1 |
|  |  | HRH4 |  |  |  |  | GRK6 | CES2 |
|  |  | CMA1 |  |  |  |  | TAS2R31 | PTGER1 |
|  |  | OXTR |  |  |  |  | GRM5 | PTGER2 |
|  |  | HSP90AA1 | |  |  |  | SLC5A2 | DHCR7 |
|  |  | PSENEN |  |  |  |  | PLA2G2A | SQLE |
|  |  | NCSTN |  |  |  |  | PLA2G5 | PTPN6 |
|  |  | APH1A |  |  |  |  | PLA2G10 | FDFT1 |
|  |  | APH1B |  |  |  |  | KLK1 | SIGMAR1 |
|  |  | PFKFB4 |  |  |  |  | KLK2 | NR3C1 |
|  |  | HTR1B |  |  |  |  | CHRNA7 | UGT2B7 |
|  |  | NQO1 |  |  |  |  | KIT | HSD11B2 |
|  |  | NAAA |  |  |  |  | FGFR1 | PDE5A |
|  |  | PTK2B |  |  |  |  | NQO2 | TBXAS1 |
|  |  | TAAR1 |  |  |  |  | HSD17B14 | HTR2A |
|  |  | NUDT1 |  |  |  |  | CLK1 | HTR2C |
|  |  | MCHR1 |  |  |  |  | DYRK1B | ESRRB |
|  |  | RPS6KB1 |  |  |  |  | EDNRA | CCR4 |
|  |  | CTSD |  |  |  |  | SIRT2 | ALDH2 |
|  |  | TDP2 |  |  |  |  | PTGER4 | HSP90B1 |
|  |  | P2RX3 |  |  |  |  | PIK3CB | HSP90AA1 |
|  |  | IDO1 |  |  |  |  | CYP2C9 | GPR84 |
|  |  | MAPT |  |  |  |  | PIK3CA | HSP90AB1 |
|  |  | SNCA |  |  |  |  | ADCY5 | GCGR |
|  |  | ST3GAL3 |  |  |  |  | PGF | SIRT1 |
|  |  | FUT7 |  |  |  |  | YWHAG | MIF |
|  |  | FUT4 |  |  |  |  | CTSL | PFKFB3 |
|  |  | GRM2 |  |  |  |  | VCP | FNTB |
|  |  | FFAR1 |  |  |  |  | LCK | FNTA |
|  |  | HIF1A |  |  |  |  | WEE1 | TLR9 |
|  |  | ATP4A |  |  |  |  | HNF4A | CA5B |
|  |  | ATP4B |  |  |  |  | CTSK | DHODH |
|  |  | TYMP |  |  |  |  | DRD2 | STS |
|  |  | SRD5A1 |  |  |  |  | DRD3 | ERCC5 |
|  |  | SLC5A1 |  |  |  |  | EZR | FEN1 |
|  |  | SLC28A3 |  |  |  |  | ANPEP | DUSP3 |
|  |  | SLC5A4 |  |  |  |  | TRPV1 | CDC7 |
|  |  | EIF4A1 |  |  |  |  | NR4A1 | F10 |
|  |  | HRAS |  |  |  |  | ERN1 | CFTR |
|  |  | EPHX2 |  |  |  |  | BRAF | AMY1A |
|  |  | TDP1 |  |  |  |  | MAPKAPK2 | TAS2R31 |
|  |  | SLC29A1 |  |  |  |  | ROCK2 | GRM5 |
|  |  | MGMT |  |  |  |  | ROCK1 | SLC5A2 |
|  |  | ACE |  |  |  |  | HSD17B3 | PLA2G2A |
|  |  | LGALS7 |  |  |  |  | PIM2 | PLA2G5 |
|  |  | LGALS1 |  |  |  |  | ADORA2B | PLA2G10 |
|  |  | MMP7 |  |  |  |  | DRD1 | KLK1 |
|  |  | MMP8 |  |  |  |  | PDK1 | KLK2 |
|  |  | ALOX15 |  |  |  |  | HTR1A | CHRNA7 |
|  |  | DAPK1 |  |  |  |  | PIM3 | KIT |
|  |  | PKN1 |  |  |  |  | TBXA2R | FGFR1 |
|  |  | NEK6 |  |  |  |  | MAP2K1 | NQO2 |
|  |  | NUAK1 |  |  |  |  | MELK | HSD17B14 |
|  |  | NTRK1 |  |  |  |  | CYP24A1 | CLK1 |
|  |  | ADRA2A |  |  |  |  | CYP11B1 | DYRK1B |
|  |  | ADRA2B |  |  |  |  | PSENEN | EDNRA |
|  |  | HDAC3 |  |  |  |  | NCSTN | SIRT2 |
|  |  | HDAC2 |  |  |  |  | APH1A | PTGER4 |
|  |  | CSNK1D |  |  |  |  | PSEN1 | PIK3CB |
|  |  | FNTA |  |  |  |  | APH1B | CYP2C9 |
|  |  | PGGT1B |  |  |  |  | PSEN2 | PIK3CA |
|  |  | FNTB |  |  |  |  | CYP11B2 | ADCY5 |
|  |  | TGFBR1 |  |  |  |  | NEK1 | PGF |
|  |  | FAAH |  |  |  |  | HDAC5 | YWHAG |
|  |  | GSK3A |  |  |  |  | HDAC7 | CTSL |
|  |  | HSF1 |  |  |  |  | HDAC9 | VCP |
|  |  | PGR |  |  |  |  | DDX3X | LCK |
|  |  | CSNK1G1 |  |  |  |  | GRIA1 | WEE1 |
|  |  | PPOX |  |  |  |  | MMP16 | HNF4A |
|  |  | ADRA1A |  |  |  |  | MMP8 | CTSK |
|  |  | CNR1 |  |  |  |  | MTOR | EZR |
|  |  | PTAFR |  |  |  |  | AURKA | ANPEP |
|  |  |  |  |  |  |  | MMP7 | TRPV1 |
|  |  |  |  |  |  |  | CLK4 | NR4A1 |
|  |  |  |  |  |  |  | CLK2 | ERN1 |
|  |  |  |  |  |  |  | ROS1 | BRAF |
|  |  |  |  |  |  |  | PNMT | MAPKAPK2 |
|  |  |  |  |  |  |  | LNPEP | ROCK2 |
|  |  |  |  |  |  |  | EGLN1 | ROCK1 |
|  |  |  |  |  |  |  | KDM4B | HSD17B3 |
|  |  |  |  |  |  |  | NPY5R | PIM2 |
|  |  |  |  |  |  |  | ADAM10 | ADORA2B |
|  |  |  |  |  |  |  | ALPL | PDK1 |
|  |  |  |  |  |  |  | DRD5 | HTR1A |
|  |  |  |  |  |  |  | PCNA | PIM3 |
|  |  |  |  |  |  |  | ADAM17 | TBXA2R |
|  |  |  |  |  |  |  | NOX1 | MAP2K1 |
|  |  |  |  |  |  |  | ADAM9 | MELK |
|  |  |  |  |  |  |  | CLK3 | CYP24A1 |
|  |  |  |  |  |  |  | PDGFRB | CYP11B1 |
|  |  |  |  |  |  |  | GSK3A | PSENEN |
|  |  |  |  |  |  |  | CASP6 | NCSTN |
|  |  |  |  |  |  |  | CASP7 | APH1A |
|  |  |  |  |  |  |  | RET | PSEN1 |
|  |  |  |  |  |  |  | JAK3 | APH1B |
|  |  |  |  |  |  |  | TGFBR1 | PSEN2 |
|  |  |  |  |  |  |  | ACVR1 | CYP11B2 |
|  |  |  |  |  |  |  | ADAMTS5 | NEK1 |
|  |  |  |  |  |  |  | CDK3 | HDAC5 |
|  |  |  |  |  |  |  | CCNE1 | HDAC7 |
|  |  |  |  |  |  |  | KDM1A | HDAC9 |
|  |  |  |  |  |  |  | CCNA1 | DDX3X |
|  |  |  |  |  |  |  | BMP1 | GRIA1 |
|  |  |  |  |  |  |  | PDE4A | MMP16 |
|  |  |  |  |  |  |  | PDE4B | MMP8 |
|  |  |  |  |  |  |  | PDE4C | MTOR |
|  |  |  |  |  |  |  | ADAMTS4 | AURKA |
|  |  |  |  |  |  |  | COMT | MMP7 |
|  |  |  |  |  |  |  | ABL1 | CLK4 |
|  |  |  |  |  |  |  | HDAC6 | CLK2 |
|  |  |  |  |  |  |  | HDAC8 | ROS1 |
|  |  |  |  |  |  |  | HDAC1 | PNMT |
|  |  |  |  |  |  |  | ACACB | LNPEP |
|  |  |  |  |  |  |  | HDAC3 | KDM4B |
|  |  |  |  |  |  |  | HDAC2 | NPY5R |
|  |  |  |  |  |  |  | SCD | ADAM10 |
|  |  |  |  |  |  |  | PLAA | ALPL |
|  |  |  |  |  |  |  | MARK1 | ADAM17 |
|  |  |  |  |  |  |  | PDGFRA | NOX1 |
|  |  |  |  |  |  |  | ENPP1 | ADAM9 |
|  |  |  |  |  |  |  | IMPDH1 | CLK3 |
|  |  |  |  |  |  |  | STAT6 | PDGFRB |
|  |  |  |  |  |  |  | EPHA2 | GSK3A |
|  |  |  |  |  |  |  | BLK | CASP6 |
|  |  |  |  |  |  |  | CSK | RET |
|  |  |  |  |  |  |  | EPHB2 | JAK3 |
|  |  |  |  |  |  |  | BMX | TGFBR1 |
|  |  |  |  |  |  |  | SLC5A1 | ACVR1 |
|  |  |  |  |  |  |  | RPS6KB1 | ADAMTS5 |
|  |  |  |  |  |  |  | SGK1 | CDK3 |
|  |  |  |  |  |  |  | PDPK1 | CCNE1 |
|  |  |  |  |  |  |  | TRPM8 | KDM1A |
|  |  |  |  |  |  |  | EPHB4 | CCNA1 |
|  |  |  |  |  |  |  | SLC29A1 | BMP1 |
|  |  |  |  |  |  |  | GRK2 | PDE4A |
|  |  |  |  |  |  |  | SPHK2 | PDE4B |
|  |  |  |  |  |  |  | SPHK1 | PDE4C |
|  |  |  |  |  |  |  | ECE1 | ADAMTS4 |
|  |  |  |  |  |  |  | DNM1 | COMT |
|  |  |  |  |  |  |  | TNF | ABL1 |
|  |  |  |  |  |  |  | DPP4 | HDAC6 |
|  |  |  |  |  |  |  | HTR7 | HDAC8 |
|  |  |  |  |  |  |  | DPP7 | HDAC1 |
|  |  |  |  |  |  |  | DPP8 | ACACB |
|  |  |  |  |  |  |  | CSNK1G1 | HDAC3 |
|  |  |  |  |  |  |  | RPS6KA1 | HDAC2 |
|  |  |  |  |  |  |  | HDAC4 | SCD |
|  |  |  |  |  |  |  | DUT | PLAA |
|  |  |  |  |  |  |  | PDE4D | MARK1 |
|  |  |  |  |  |  |  | EIF2AK2 | PDGFRA |
|  |  |  |  |  |  |  | MMP15 | ENPP1 |
|  |  |  |  |  |  |  | MMP14 | IMPDH1 |
|  |  |  |  |  |  |  | MMP26 | STAT6 |
|  |  |  |  |  |  |  | AGTR1 | EPHA2 |
|  |  |  |  |  |  |  | GUSB | BLK |
|  |  |  |  |  |  |  | TGM2 | CSK |
|  |  |  |  |  |  |  | PARP2 | BMX |
|  |  |  |  |  |  |  | NTRK1 | SLC5A1 |
|  |  |  |  |  |  |  | NFKB1 | RPS6KB1 |
|  |  |  |  |  |  |  | UBA2 | SGK1 |
|  |  |  |  |  |  |  | CCNE2 | PDPK1 |
|  |  |  |  |  |  |  | SAE1 | TRPM8 |
|  |  |  |  |  |  |  | ME1 | EPHB4 |
|  |  |  |  |  |  |  | CMA1 | SLC29A1 |
|  |  |  |  |  |  |  | CCKBR | GRK2 |
|  |  |  |  |  |  |  | KIF11 | SPHK2 |
|  |  |  |  |  |  |  | EPHX2 | SPHK1 |
|  |  |  |  |  |  |  | MPEG1 | ECE1 |
|  |  |  |  |  |  |  | GNRHR | DNM1 |
|  |  |  |  |  |  |  | ITK | TNF |
|  |  |  |  |  |  |  | PTGIR | DPP4 |
|  |  |  |  |  |  |  | SCARB1 | HTR7 |
|  |  |  |  |  |  |  | NAAA | DPP7 |
|  |  |  |  |  |  |  | TACR3 | DPP8 |
|  |  |  |  |  |  |  | S1PR3 | CSNK1G1 |
|  |  |  |  |  |  |  | S1PR1 | RPS6KA1 |
|  |  |  |  |  |  |  | MDM4 | HDAC4 |
|  |  |  |  |  |  |  | MDM2 | DUT |
|  |  |  |  |  |  |  | FAAH | PDE4D |
|  |  |  |  |  |  |  | ITGB2 | EIF2AK2 |
|  |  |  |  |  |  |  | ITGAL | MMP15 |
|  |  |  |  |  |  |  | P2RX3 | MMP14 |
|  |  |  |  |  |  |  | EP300 | MMP26 |
|  |  |  |  |  |  |  | PTPN11 | AGTR1 |
|  |  |  |  |  |  |  | SNCA | GUSB |
|  |  |  |  |  |  |  | CRHR1 | TGM2 |
|  |  |  |  |  |  |  | IGFBP6 | PARP2 |
|  |  |  |  |  |  |  | IGFBP4 | NTRK1 |
|  |  |  |  |  |  |  | IGFBP5 | NFKB1 |
|  |  |  |  |  |  |  | IGFBP2 | CCNE2 |
|  |  |  |  |  |  |  | IGFBP1 | ME1 |
|  |  |  |  |  |  |  | KCNA5 | CMA1 |
|  |  |  |  |  |  |  | KCNA3 | CCKBR |
|  |  |  |  |  |  |  | PTP4A3 | KIF11 |
|  |  |  |  |  |  |  | RARA | EPHX2 |
|  |  |  |  |  |  |  | GABRB2 | MPEG1 |
|  |  |  |  |  |  |  | GABRB3 | GNRHR |
|  |  |  |  |  |  |  | GABRA3 | ITK |
|  |  |  |  |  |  |  | CDK4 | PTGIR |
|  |  |  |  |  |  |  | GABRG2 | SCARB1 |
|  |  |  |  |  |  |  | CNR2 | NAAA |
|  |  |  |  |  |  |  | NAE1 | TACR3 |
|  |  |  |  |  |  |  | PTAFR | S1PR3 |
|  |  |  |  |  |  |  | DHFR | S1PR1 |
|  |  |  |  |  |  |  | GRM4 | MDM4 |
|  |  |  |  |  |  |  | GABRA5 | FAAH |
|  |  |  |  |  |  |  | GABRA6 | ITGB2 |
|  |  |  |  |  |  |  | ELANE | ITGAL |
|  |  |  |  |  |  |  | RPS6KA2 | P2RX3 |
|  |  |  |  |  |  |  | CCND2 | EP300 |
|  |  |  |  |  |  |  | CCND3 | PTPN11 |
|  |  |  |  |  |  |  | LRRK2 | SNCA |
|  |  |  |  |  |  |  | GRK7 | CRHR1 |
|  |  |  |  |  |  |  | HIPK4 | IGFBP6 |
|  |  |  |  |  |  |  | TAOK2 | IGFBP4 |
|  |  |  |  |  |  |  | PIK3C2G | IGFBP5 |
|  |  |  |  |  |  |  | PIP4K2C | IGFBP2 |
|  |  |  |  |  |  |  | CSF1R | IGFBP1 |
|  |  |  |  |  |  |  | CASK | KCNA5 |
|  |  |  |  |  |  |  | PIP5K1C | KCNA3 |
|  |  |  |  |  |  |  | DSTYK | PTP4A3 |
|  |  |  |  |  |  |  | MAP2K3 | RARA |
|  |  |  |  |  |  |  | RPS6KA3 | GABRB3 |
|  |  |  |  |  |  |  | PHKG2 | GABRA3 |
|  |  |  |  |  |  |  | DAPK3 | CDK4 |
|  |  |  |  |  |  |  | CSNK1G2 | GABRG2 |
|  |  |  |  |  |  |  | FGFR3 | CNR2 |
|  |  |  |  |  |  |  | CSNK1A1 | NAE1 |
|  |  |  |  |  |  |  | CSNK1D | PTAFR |
|  |  |  |  |  |  |  | JAK1 | DHFR |
|  |  |  |  |  |  |  | MAP3K9 | GRM4 |
|  |  |  |  |  |  |  | PRKG2 | GABRA5 |
|  |  |  |  |  |  |  | MAP2K4 | GABRA6 |
|  |  |  |  |  |  |  | MAP2K2 | ELANE |
|  |  |  |  |  |  |  | JAK2 | RPS6KA2 |
|  |  |  |  |  |  |  | CDK7 | CCND2 |
|  |  |  |  |  |  |  | DAPK2 | CCND3 |
|  |  |  |  |  |  |  | RPS6KA4 | LRRK2 |
|  |  |  |  |  |  |  | PIK3CD | GRK7 |
|  |  |  |  |  |  |  | PRKDC | HIPK4 |
|  |  |  |  |  |  |  | TUBB1 | TAOK2 |
|  |  |  |  |  |  |  | NR1D1 | PIK3C2G |
|  |  |  |  |  |  |  | MMP25 | PIP4K2C |
|  |  |  |  |  |  |  | HPGDS | CSF1R |
|  |  |  |  |  |  |  | CCNC | CASK |
|  |  |  |  |  |  |  | CDK8 | PIP5K1C |
|  |  |  |  |  |  |  | FCER2 | DSTYK |
|  |  |  |  |  |  |  | SLC1A3 | MAP2K3 |
|  |  |  |  |  |  |  | CXCR4 | RPS6KA3 |
|  |  |  |  |  |  |  | CTSS | PHKG2 |
|  |  |  |  |  |  |  | CAPN1 | DAPK3 |
|  |  |  |  |  |  |  | GLI2 | CSNK1G2 |
|  |  |  |  |  |  |  | GLI1 | FGFR3 |
|  |  |  |  |  |  |  | THRA | CSNK1A1 |
|  |  |  |  |  |  |  | THRB | CSNK1D |
|  |  |  |  |  |  |  | CALM1 | JAK1 |
|  |  |  |  |  |  |  | SLC9A1 | MAP3K9 |
|  |  |  |  |  |  |  | MAP4K4 | PRKG2 |
|  |  |  |  |  |  |  | MAPKAPK5 | MAP2K4 |
|  |  |  |  |  |  |  | HDAC10 | MAP2K2 |
|  |  |  |  |  |  |  | SSTR2 | JAK2 |
|  |  |  |  |  |  |  | TKT | CDK7 |
|  |  |  |  |  |  |  | ACP1 | DAPK2 |
|  |  |  |  |  |  |  | CNOT7 | RPS6KA4 |
|  |  |  |  |  |  |  | OPRK1 | PIK3CD |
|  |  |  |  |  |  |  | FBP1 | PRKDC |
|  |  |  |  |  |  |  | CALCA | TUBB1 |
|  |  |  |  |  |  |  | KISS1R | NR1D1 |
|  |  |  |  |  |  |  | CXCR2 | MMP25 |
|  |  |  |  |  |  |  | IDH1 | HPGDS |
|  |  |  |  |  |  |  | PRKCE | CCNC |
|  |  |  |  |  |  |  | PRKCG | CDK8 |
|  |  |  |  |  |  |  | PRKCD | FCER2 |
|  |  |  |  |  |  |  | PRKCH | SLC1A3 |
|  |  |  |  |  |  |  | PLEC | CXCR4 |
|  |  |  |  |  |  |  | BACE2 | CTSS |
|  |  |  |  |  |  |  | PDE7A | CAPN1 |
|  |  |  |  |  |  |  | TAOK1 | GLI2 |
|  |  |  |  |  |  |  | TAOK3 | GLI1 |
|  |  |  |  |  |  |  | IKBKE | THRA |
|  |  |  |  |  |  |  | TBK1 | THRB |
|  |  |  |  |  |  |  | XPO1 | CALM1 |
|  |  |  |  |  |  |  | MERTK | SLC9A1 |
|  |  |  |  |  |  |  | CTSB | MAP4K4 |
|  |  |  |  |  |  |  | SF3B3 | MAPKAPK5 |
|  |  |  |  |  |  |  | NCOR2 | HDAC10 |
|  |  |  |  |  |  |  | NCOR1 | SSTR2 |
|  |  |  |  |  |  |  | HDAC11 | TKT |
|  |  |  |  |  |  |  | LIMK1 | ACP1 |
|  |  |  |  |  |  |  | LIMK2 | CNOT7 |
|  |  |  |  |  |  |  | FKBP1A | OPRK1 |
|  |  |  |  |  |  |  | HPGD | FBP1 |
|  |  |  |  |  |  |  | STK17B | CALCA |
|  |  |  |  |  |  |  | MPI | KISS1R |
|  |  |  |  |  |  |  | PRF1 | CXCR2 |
|  |  |  |  |  |  |  | MGLL | IDH1 |
|  |  |  |  |  |  |  | RASGRP3 | PRKCE |
|  |  |  |  |  |  |  | HTR6 | PRKCG |
|  |  |  |  |  |  |  | SCN9A | PRKCD |
|  |  |  |  |  |  |  | ALOX5AP | PRKCH |
|  |  |  |  |  |  |  | ABHD6 | PLEC |
|  |  |  |  |  |  |  | IMPDH2 | BACE2 |
|  |  |  |  |  |  |  | HPSE | PDE7A |
|  |  |  |  |  |  |  | MKNK1 | TAOK1 |
|  |  |  |  |  |  |  | ADRA2A | TAOK3 |
|  |  |  |  |  |  |  | EDNRB | IKBKE |
|  |  |  |  |  |  |  | ALPG | TBK1 |
|  |  |  |  |  |  |  | HCK | XPO1 |
|  |  |  |  |  |  |  | PI4KB | MERTK |
|  |  |  |  |  |  |  | PTK6 | CTSB |
|  |  |  |  |  |  |  | FGFR2 | SF3B3 |
|  |  |  |  |  |  |  | DBF4 | NCOR2 |
|  |  |  |  |  |  |  | MME | NCOR1 |
|  |  |  |  |  |  |  | MBD2 | HDAC11 |
|  |  |  |  |  |  |  | TNNT2 | LIMK1 |
|  |  |  |  |  |  |  | TNNI3 | LIMK2 |
|  |  |  |  |  |  |  | TNNC1 | FKBP1A |
|  |  |  |  |  |  |  | QPCT | HPGD |
|  |  |  |  |  |  |  | HTT | STK17B |
|  |  |  |  |  |  |  | CHRNB2 | MPI |
|  |  |  |  |  |  |  | CHRNA4 | PRF1 |
|  |  |  |  |  |  |  | RIPK2 | MGLL |
|  |  |  |  |  |  |  | SLC5A4 | RASGRP3 |
|  |  |  |  |  |  |  | EIF4A1 | HTR6 |
|  |  |  |  |  |  |  | SLC28A3 | SCN9A |
|  |  |  |  |  |  |  | SRD5A1 | ALOX5AP |
|  |  |  |  |  |  |  | CDC42BPA | ABHD6 |
|  |  |  |  |  |  |  | WDR5 | IMPDH2 |
|  |  |  |  |  |  |  | WNT3A | HPSE |
|  |  |  |  |  |  |  | ACVRL1 | MKNK1 |
|  |  |  |  |  |  |  | CHRNB4 | EDNRB |
|  |  |  |  |  |  |  | CHRNA3 | ALPG |
|  |  |  |  |  |  |  | BMP4 | HCK |
|  |  |  |  |  |  |  | AVPR1A | PI4KB |
|  |  |  |  |  |  |  | TUBB3 | PTK6 |
|  |  |  |  |  |  |  | GSTA1 | FGFR2 |
|  |  |  |  |  |  |  | KDM5A | DBF4 |
|  |  |  |  |  |  |  | SCN2A | MME |
|  |  |  |  |  |  |  | GABRA2 | MBD2 |
|  |  |  |  |  |  |  | ESRRG | TNNT2 |
|  |  |  |  |  |  |  | TNK2 | TNNI3 |
|  |  |  |  |  |  |  | DMPK | TNNC1 |
|  |  |  |  |  |  |  | MTNR1A | QPCT |
|  |  |  |  |  |  |  | IDO1 | HTT |
|  |  |  |  |  |  |  | TSPO | CHRNB2 |
|  |  |  |  |  |  |  | PITRM1 | CHRNA4 |
|  |  |  |  |  |  |  | PRKCZ | RIPK2 |
|  |  |  |  |  |  |  | ASAH1 | SLC5A4 |
|  |  |  |  |  |  |  | RARG | EIF4A1 |
|  |  |  |  |  |  |  | HTR1B | SLC28A3 |
|  |  |  |  |  |  |  | TACR2 | SRD5A1 |
|  |  |  |  |  |  |  | PHLPP2 | CDC42BPA |
|  |  |  |  |  |  |  | EPHA5 | WDR5 |
|  |  |  |  |  |  |  | EPHA4 | WNT3A |
|  |  |  |  |  |  |  | EPHA8 | ACVRL1 |
|  |  |  |  |  |  |  | EPHA7 | CHRNB4 |
|  |  |  |  |  |  |  | EPHB3 | CHRNA3 |
|  |  |  |  |  |  |  | EPHA3 | BMP4 |
|  |  |  |  |  |  |  | EPHB1 | AVPR1A |
|  |  |  |  |  |  |  | EPHA1 | TUBB3 |
|  |  |  |  |  |  |  | SLC28A2 | GSTA1 |
|  |  |  |  |  |  |  | ADK | KDM5A |
|  |  |  |  |  |  |  | MGMT | SCN2A |
|  |  |  |  |  |  |  | HK1 | GABRA2 |
|  |  |  |  |  |  |  | SLC2A1 | ESRRG |
|  |  |  |  |  |  |  | PAK4 | TNK2 |
|  |  |  |  |  |  |  | MMP10 | DMPK |
|  |  |  |  |  |  |  | PLA2G7 | MTNR1A |
|  |  |  |  |  |  |  | CTSV | IDO1 |
|  |  |  |  |  |  |  | MTNR1B | TSPO |
|  |  |  |  |  |  |  | PTK2B | PITRM1 |
|  |  |  |  |  |  |  | CALCRL | PRKCZ |
|  |  |  |  |  |  |  | P2RX7 | ASAH1 |
|  |  |  |  |  |  |  | DYRK2 | RARG |
|  |  |  |  |  |  |  | CDK9 | HTR1B |
|  |  |  |  |  |  |  | CCNT1 | TACR2 |
|  |  |  |  |  |  |  | CAPNS1 | PHLPP2 |
|  |  |  |  |  |  |  | DYRK3 | EPHA5 |
|  |  |  |  |  |  |  | HCRTR2 | EPHA4 |
|  |  |  |  |  |  |  | SLC2A3 | EPHA8 |
|  |  |  |  |  |  |  | SLC2A2 | EPHA7 |
|  |  |  |  |  |  |  | MAPK11 | EPHB3 |
|  |  |  |  |  |  |  | CFD | EPHA3 |
|  |  |  |  |  |  |  | OXTR | EPHB1 |
|  |  |  |  |  |  |  | CCR3 | EPHA1 |
|  |  |  |  |  |  |  | CASR | SLC28A2 |
|  |  |  |  |  |  |  | PRKACA | ADK |
|  |  |  |  |  |  |  | LIPG | MGMT |
|  |  |  |  |  |  |  | HCRTR1 | HK1 |
|  |  |  |  |  |  |  | RAC1 | SLC2A1 |
|  |  |  |  |  |  |  | BAZ2B | PAK4 |
|  |  |  |  |  |  |  | BAZ2A | PLA2G7 |
|  |  |  |  |  |  |  | CTSG | CTSV |
|  |  |  |  |  |  |  | GCK | MTNR1B |
|  |  |  |  |  |  |  | NAMPT | PTK2B |
|  |  |  |  |  |  |  | KDM5C | CALCRL |
|  |  |  |  |  |  |  | KDM4A | P2RX7 |
|  |  |  |  |  |  |  | KDM4D | DYRK2 |
|  |  |  |  |  |  |  | KDM4C | CDK9 |
|  |  |  |  |  |  |  | IRAK4 | CCNT1 |
|  |  |  |  |  |  |  | EPHX1 | CAPNS1 |
|  |  |  |  |  |  |  | PROKR1 | DYRK3 |
|  |  |  |  |  |  |  | PRKCQ | HCRTR2 |
|  |  |  |  |  |  |  | AGPAT2 | SLC2A3 |
|  |  |  |  |  |  |  | GRIN1 | SLC2A2 |
|  |  |  |  |  |  |  | GRM1 | MAPK11 |
|  |  |  |  |  |  |  | GRIN2A | CFD |
|  |  |  |  |  |  |  | TYMS | OXTR |
|  |  |  |  |  |  |  | SHH | CCR3 |
|  |  |  |  |  |  |  | TRPA1 | CASR |
|  |  |  |  |  |  |  | KAT2B | PRKACA |
|  |  |  |  |  |  |  | KCNK3 | LIPG |
|  |  |  |  |  |  |  | KCNK9 | HCRTR1 |
|  |  |  |  |  |  |  | PGK1 | RAC1 |
|  |  |  |  |  |  |  | TGFB1 | BAZ2B |
|  |  |  |  |  |  |  | FABP4 | BAZ2A |
|  |  |  |  |  |  |  | FABP5 | CTSG |
|  |  |  |  |  |  |  | FABP1 | GCK |
|  |  |  |  |  |  |  | FABP3 | NAMPT |
|  |  |  |  |  |  |  | PREP | KDM5C |
|  |  |  |  |  |  |  | FFAR1 | KDM4A |
|  |  |  |  |  |  |  | CNR1 | KDM4D |
|  |  |  |  |  |  |  | CD81 | KDM4C |
|  |  |  |  |  |  |  | LTB4R | IRAK4 |
|  |  |  |  |  |  |  | PTPRF | EPHX1 |
|  |  |  |  |  |  |  | SRD5A2 | PROKR1 |
|  |  |  |  |  |  |  | SLC22A6 | PRKCQ |
|  |  |  |  |  |  |  | USP1 | AGPAT2 |
|  |  |  |  |  |  |  | ADRA2C | GRIN1 |
|  |  |  |  |  |  |  | ADRA2B | GRM1 |
|  |  |  |  |  |  |  | TAAR1 | GRIN2A |
|  |  |  |  |  |  |  | XIAP | TYMS |
|  |  |  |  |  |  |  | TYMP | SHH |
|  |  |  |  |  |  |  | FOLH1 | TRPA1 |
|  |  |  |  |  |  |  | CPT1A | KAT2B |
|  |  |  |  |  |  |  | LYN | KCNK3 |
|  |  |  |  |  |  |  | TXK | KCNK9 |
|  |  |  |  |  |  |  | EPHA6 | PGK1 |
|  |  |  |  |  |  |  | BTK | TGFB1 |
|  |  |  |  |  |  |  | TYRO3 | FABP4 |
|  |  |  |  |  |  |  | COQ8B | FABP5 |
|  |  |  |  |  |  |  | MARS | FABP1 |
|  |  |  |  |  |  |  | BRD4 | FABP3 |
|  |  |  |  |  |  |  | LDHA | PREP |
|  |  |  |  |  |  |  | PDE6C | FFAR1 |
|  |  |  |  |  |  |  | ADAM33 | CNR1 |
|  |  |  |  |  |  |  | PDF | CD81 |
|  |  |  |  |  |  |  | SMARCA2 | LTB4R |
|  |  |  |  |  |  |  | AKT2 | PTPRF |
|  |  |  |  |  |  |  | PTGDR | SRD5A2 |
|  |  |  |  |  |  |  | PTGFR | SLC22A6 |
|  |  |  |  |  |  |  | GPBAR1 | USP1 |
|  |  |  |  |  |  |  | PTGDR2 | TAAR1 |
|  |  |  |  |  |  |  | PDE2A | XIAP |
|  |  |  |  |  |  |  | F11 | TYMP |
|  |  |  |  |  |  |  | S1PR2 | FOLH1 |
|  |  |  |  |  |  |  | OAT | CPT1A |
|  |  |  |  |  |  |  | SLC10A2 | LYN |
|  |  |  |  |  |  |  | ITGAV | TXK |
|  |  |  |  |  |  |  | ITGA2B | EPHA6 |
|  |  |  |  |  |  |  | ITGB1 | BTK |
|  |  |  |  |  |  |  | CTSA | TYRO3 |
|  |  |  |  |  |  |  | ITGB3 | COQ8B |
|  |  |  |  |  |  |  | ITGA4 | MARS |
|  |  |  |  |  |  |  |  | BRD4 |
|  |  |  |  |  |  |  |  | LDHA |
|  |  |  |  |  |  |  |  | PDE6C |
|  |  |  |  |  |  |  |  | ADAM33 |
|  |  |  |  |  |  |  |  | PDF |
|  |  |  |  |  |  |  |  | SMARCA2 |
|  |  |  |  |  |  |  |  | AKT2 |
|  |  |  |  |  |  |  |  | PTGDR |
|  |  |  |  |  |  |  |  | PTGFR |
|  |  |  |  |  |  |  |  | GPBAR1 |
|  |  |  |  |  |  |  |  | PTGDR2 |
|  |  |  |  |  |  |  |  | PDE2A |
|  |  |  |  |  |  |  |  | F11 |
|  |  |  |  |  |  |  |  | S1PR2 |
|  |  |  |  |  |  |  |  | OAT |
|  |  |  |  |  |  |  |  | SLC10A2 |
|  |  |  |  |  |  |  |  | ITGAV |
|  |  |  |  |  |  |  |  | ITGA2B |
|  |  |  |  |  |  |  |  | ITGB1 |
|  |  |  |  |  |  |  |  | CTSA |
|  |  |  |  |  |  |  |  | ITGB3 |
|  |  |  |  |  |  |  |  | ITGA4 |
|  |  |  |  |  |  |  |  | HTR1D |
|  |  |  |  |  |  |  |  | RBP4 |
|  |  |  |  |  |  |  |  | RARB |
|  |  |  |  |  |  |  |  | VLDLR |
|  |  |  |  |  |  |  |  | LRP8 |
|  |  |  |  |  |  |  |  | APLP2 |
|  |  |  |  |  |  |  |  | AKR1D1 |
|  |  |  |  |  |  |  |  | PTPRD |
|  |  |  |  |  |  |  |  | NOS1 |
|  |  |  |  |  |  |  |  | BRPF1 |
|  |  |  |  |  |  |  |  | METAP2 |
|  |  |  |  |  |  |  |  | SCN10A |
|  |  |  |  |  |  |  |  | FPR1 |
|  |  |  |  |  |  |  |  | FPR2 |
|  |  |  |  |  |  |  |  | ENPP2 |
|  |  |  |  |  |  |  |  | UTS2R |
|  |  |  |  |  |  |  |  | EIF2AK3 |
|  |  |  |  |  |  |  |  | TK2 |
|  |  |  |  |  |  |  |  | BRD1 |
|  |  |  |  |  |  |  |  | TRIM24 |
|  |  |  |  |  |  |  |  | CCR9 |
|  |  |  |  |  |  |  |  | ERBB4 |
|  |  |  |  |  |  |  |  | TYK2 |
|  |  |  |  |  |  |  |  | MKNK2 |
|  |  |  |  |  |  |  |  | PDE9A |
|  |  |  |  |  |  |  |  | LIPE |
|  |  |  |  |  |  |  |  | PDE1C |
|  |  |  |  |  |  |  |  | BRS3 |
|  |  |  |  |  |  |  |  | BRD2 |
|  |  |  |  |  |  |  |  | BRD3 |
|  |  |  |  |  |  |  |  | TTK |
|  |  |  |  |  |  |  |  | CAPN2 |
|  |  |  |  |  |  |  |  | CREBBP |
|  |  |  |  |  |  |  |  | MAPK9 |
|  |  |  |  |  |  |  |  | AGTR2 |
|  |  |  |  |  |  |  |  | STK3 |
|  |  |  |  |  |  |  |  | PDE8B |
|  |  |  |  |  |  |  |  | PPP5C |
|  |  |  |  |  |  |  |  | SIRT3 |
|  |  |  |  |  |  |  |  | ST6GAL1 |
|  |  |  |  |  |  |  |  | TLR4 |
|  |  |  |  |  |  |  |  | CCR1 |
|  |  |  |  |  |  |  |  | CCR2 |
|  |  |  |  |  |  |  |  | ITGB7 |
|  |  |  |  |  |  |  |  | HCAR2 |
|  |  |  |  |  |  |  |  | GYS1 |
|  |  |  |  |  |  |  |  | DNMT3A |
|  |  |  |  |  |  |  |  | AOC3 |
|  |  |  |  |  |  |  |  | HRH3 |
|  |  |  |  |  |  |  |  | HRH4 |
|  |  |  |  |  |  |  |  | PFKFB4 |
|  |  |  |  |  |  |  |  | NUDT1 |
|  |  |  |  |  |  |  |  | MCHR1 |
|  |  |  |  |  |  |  |  | TDP2 |
|  |  |  |  |  |  |  |  | ST3GAL3 |
|  |  |  |  |  |  |  |  | FUT7 |
|  |  |  |  |  |  |  |  | FUT4 |
|  |  |  |  |  |  |  |  | GRM2 |
|  |  |  |  |  |  |  |  | ATP4A |
|  |  |  |  |  |  |  |  | ATP4B |
|  |  |  |  |  |  |  |  | HRAS |
|  |  |  |  |  |  |  |  | ACE |
|  |  |  |  |  |  |  |  | LGALS7 |
|  |  |  |  |  |  |  |  | LGALS1 |
|  |  |  |  |  |  |  |  | PGGT1B |
|  |  |  |  |  |  |  |  | PPOX |
|  |  |  |  |  |  |  |  | CCR5 |
|  |  |  |  |  |  |  |  | ADRB3 |
|  |  |  |  |  |  |  |  | RBBP9 |
|  |  |  |  |  |  |  |  | KCNN1 |
|  |  |  |  |  |  |  |  | KCNN3 |
|  |  |  |  |  |  |  |  | KCNN2 |
|  |  |  |  |  |  |  |  | CXCR3 |
|  |  |  |  |  |  |  |  | HTR2B |
|  |  |  |  |  |  |  |  | XBP1 |
|  |  |  |  |  |  |  |  | SLC18A2 |
|  |  |  |  |  |  |  |  | ATR |
|  |  |  |  |  |  |  |  | ALDH3A1 |
|  |  |  |  |  |  |  |  | SLC27A1 |
|  |  |  |  |  |  |  |  | NTRK2 |
|  |  |  |  |  |  |  |  | ADA |
|  |  |  |  |  |  |  |  | GBA |
|  |  |  |  |  |  |  |  | PNP |
|  |  |  |  |  |  |  |  | LGALS3 |
|  |  |  |  |  |  |  |  | LGALS9 |
|  |  |  |  |  |  |  |  | OGA |

# Supplementary table3| Targets of Generalized Anxiety Disorder

GABRD

PEX10

SLC45A1

RERE

PEX14

DDOST

EPHB2

DHDDS

SVBP

SLC2A1

ALG6

PGM1

SARS1

WARS2

PEX11B

PRUNE1

ARHGEF2

PEX19

UFC1

NFASC

COG2

PPP1CB

FBXO11

PEX13

MOGS

GGCX

SMPD4

CCDC115

CACNB4

TBR1

SCN1A

SCN9A

METTL5

DYNC1I2

LNPK

HECW2

ZNF142

BRPF1

IQSEC1

NGLY1

STT3B

PLCD1

CTNNB1

DHX30

DOCK3

RFT1

ZBTB11

CASR

P2RY12

RSRC1

KLHL24

AP2M1

ALG3

CLCN2

DRD5

SRD5A3

TMEM165

SEC31A

SLC39A8

SLC6A19

HCN1

ZSWIM6

RAD50

PPP2CA

PDGFRB

GABRG2

VARS1

FKBP5

PEX6

SLC17A5

SLC35A1

WASF1

NUS1

ENPP1

PEX7

PEX3

CEP43

DLL1

INTS1

BRAT1

WIPI2

CDK13

PEX1

ACTL6B

PUS7

COG5

FOXP2

CAV1

PEX2

OTUD6B

INTS8

FZD6

PLAA

B4GALT1

PRKACG

RORB

GABBR2

ALG2

DPM2

DOLK

NTNG2

GFI1B

AGPAT2

GRIN1

CACNA1B

HK1

PLAU

KCNMA1

ZMIZ1

DRD4

DEAF1

FAR1

SLC35C1

PEX16

PHF21A

TMX2

BSCL2

RASGRP2

CABP4

PAK1

ALG8

MRE11

GRIA4

ALKBH8

ALG9

DDX6

DPAGT1

CBL

STT3A

FLI1

PEX5

KRAS

CNOT2

TPH2

CRY1

DHX37

CDK8

COG6

HTR2A

ALG11

FBXL3

TRAPPC6B

MGAT2

FUT8

ACTN1

IRF2BPL

BCL11B

CCNK

GNB5

RORA

MPI

SCAPER

MTHFS

CACNA1H

MAPK8IP3

ALG1

PMM2

GRIN2A

ABCC6

COG7

STX1B

GNAO1

COG8

FCSK

COG4

GEMIN4

POLR2A

MPDU1

KDM6B

VAMP2

TMEM199

SLC6A4

BDNF

COMT

IL6

DRD2

TNF

SLC6A3

INS

MAOA

MECP2

APOE

ALB

IGF1

NR3C1

CACNA1A

POMC

MAPT

SNCA

POLG

FMR1

PRODH

CRH

GABRA1

TH

LEP

GRIN2B

RYR1

DRD3

IL10

TP53

SOD1

IL1B

APP

CNTNAP2

NGF

SCN2A

GABRB3

ACE

MTHFR

AKT1

SLC6A2

SCN8A

NRXN1

C9orf72

PRKN

NTRK2

GAD1

CACNA1C

HCRT

IFNG

LMNA

CD40LG

GDNF

PCDH19

SCN1B

CDKL5

GNAS

HLA-DRB1

KCNQ2

F2

CCL2

GCH1

CHRNA7

ESR1

HTR1A

LOC110806262

PSEN1

CAT

PRNP

FGFR1

SLC6A1

STXBP1

ELN

PRRT2

TGFB1

GHRL

PRL

ERCC6

FOS

DMD

TARDBP

PON1

NF1

TOR1A

CREBBP

SGCE

VCP

WFS1

TSC2

PTEN

GNRH1

JAK2

MTOR

ATXN2

UBE3A

ANK3

CCR6

RET

CYP2C19

ATP13A2

ATP1A3

TLR4

ATXN3

HLA-DQB1

PDYN

PIK3CA

NOS1

MMP9

REN

SCN1A-AS1

GRN

CTLA4

CHRNA4

PPARG

IQSEC2

HTT

GBA

FLNA

FUS

ARX

AR

SCN4A

SLC1A1

PINK1

CRP

VWF

GFAP

DISC1

IGF2

PARK7

SYP

SDHB

EGF

EDN1

LRRK2

FBN1

BRCA2

HTR2C

SNAP25

GH1

SLC1A2

NPSR1

IL1RN

RELN

EPO

HFE

SQSTM1

NPY

SHH

GABRB2

FAS

PSAP

TBP

CHD7

IL2RA

VDR

MT-ND1

KCNA1

POGZ

KCNQ3

HRAS

GABRA5

GPHN

CFI

STAT3

FA2H

COL1A1

FGFR3

MEN1

HTR3A

PLA2G6

FGF8

TPH1

CHMP2B

EGFR

SCN5A

PTPN11

SDHD

USH2A

ADNP

TWNK

ICAM1

TCF20

SDHA

CFTR

MT-CO1

GAL

ARSA

NOTCH1

HLA-B

SLC18A2

PRKAR1A

PTH

BRAF

HSPG2

MT-TL1

NIPBL

APOB

KIT

CNR1

SLC12A5

CP

TGFBR2

EHMT1

EP300

PAH

MT-ATP6

COQ2

CHAT

KITLG

LGI1

SCN3A

CYP2D6

ATXN1

NTRK1

TTN

CAVIN1

BRCA1

MBD5

GLA

NOS3

TTR

SHANK3

RAI1

ALDH5A1

GRM1

GRIK2

GGT1

MPO

MLH1

SLC1A3

TSPO

TAF1

GABRA2

EPRS1

CRYAA

PLP1

ATRX

DLG3

MMP2

NLGN4X

PAX6

MT-ND6

MAPK1

TPO

TBX1

ATP1A2

STAT1

HLA-DQA1

DCTN1

ATM

DDC

TYR

SYNGAP1

XK

HADHA

ABAT

MIR132

NPC1

MT-ND4

TLR2

PANK2

MPZ

TF

APOA1

MSH2

NSD1

SPG11

THRB

TNFRSF1A

KCNT1

CYP17A1

FOXG1

TSC1

CDH23

G6PD

GRIA3

CXCL8

FN1

NAGLU

JRK

DAO

SETD2

MT-ND5

RBFOX1

OPRM1

PNKD

CCK

CYP19A1

NRAS

GNAL

DTNBP1

CHRNB2

MYC

FOXP3

ARID1B

KMT2A

MT-TK

SERPINE1

KAT6B

FXN

NOS2

PSEN2

CASK

TMEM106B

SLC25A4

DNMT1

HMBS

CEP290

OXT

EFHC1

SDHC

TREM2

TBC1D24

UCHL1

SLC25A13

SCN11A

IL13

TMEM67

B2M

CRHR1

ELANE

MAP2K1

GTF2I

ADGRV1

BMP4

NR3C2

CREB1

RUNX1

KIF1B

MOG

SERPINA1

PER2

CALR

KRT14

CLN3

ATP7A

ERBB4

TNFRSF1B

FASLG

NLGN3

SETD5

MAOB

TBK1

ALG13

APC

VPS13B

MVK

BTD

AUTS2

HPRT1

CD79A

ATXN7

THBD

FKRP

SLC9A6

MTR

HBB

CYP21A2

LRP5

ABCC8

VPS13A

DAOA

SMAD4

CTSD

VIM

AVP

LDLR

COL1A2

GJB2

THAP1

NR5A1

OTC

PDGFB

HTR1B

BCHE

MT-CO2

HLA-A

MT-CO3

GABRB1

SMPD1

SRPX2

NAGS

MYH7

KCNJ11

SPP1

ADIPOQ

OPTN

NKX2-1

HNRNPA1

MC4R

C19orf12

ADA

PQBP1

CHRNA2

THPO

AIRE

SLC9A7

PTPN22

PTPRC

WRN

GM2A

F5

NLRP3

LAMA2

PER3

TRPV4

DNMT3A

SPAST

NEFL

MED12

CYP27B1

FIG4

CAV3

IL2

ACADM

MT-CYB

MAG

SPG7

MSH6

ZMPSTE24

DMPK

TNFSF11

GHR

CST3

CD40

MIR21

SHANK2

JPH3

ATP7B

MME

TP63

H2AC18

IGF1R

NTF4

SPG21

ITGB3

CPT2

TERT

TYMP

POLR3A

PMP22

CD28

TFRC

ADAMTS2

FGF23

PNPO

SMC1A

WT1

PLG

NPC2

ADRB2

CCND1

EDNRB

MIR22

H19

SST

SMARCA2

ALDH18A1

SMC3

ABCA1

SOX2

RAB39B

DPP6

SRC

GLB1

HMOX1

GNB3

CPOX

ACTA1

POLG2

DEPDC5

VHL

MEF2C

ADSL

CACNA1S

KCNB1

NOTCH3

FOXP1

PPARGC1A

CHD8

ABCA4

DISC2

NPPA

XDH

SETX

IL4

TET2

PMS2

KDM5C

NDUFS4

RPGR

TPP1

VEGFA

CACNA1G

HEXA

CHCHD10

PPP2R2B

GABBR1

PDGFRA

GATA1

TG

SOX10

SOX9

EZH2

FTL

BMPR1A

NEFH

RYR2

C4A

NHLRC1

SYNE1

CLCN4

SLC6A8

CDKN2A

HDAC8

NOD2

ZFYVE26

CCR5

GLI3

DRD1

AGTR1

HSPD1

RUNX2

ATN1

MYH9

OCRL

COL3A1

LTA

ATXN10

SELENON

GAA

RRM2B

DYNC1H1

SNRPN

KMT2D

CSTB

OXTR

DBH

TCF4

INSR

KRT5

FH

SCN4B

CLCN1

AFF2

UBQLN2

CLN8

AGT

FAN1

HTRA2

F10

RAF1

LAMP2

MMP1

KCTD7

RHO

CXCR4

CYP3A4

CHKB

SPTAN1

CACNA1D

CASP8

LOX

CLN5

CTCF

KANSL1

SYN1

ACADS

PLCB1

GLUL

NR4A2

EPM2A

KISS1

SERPINC1

U2AF1

CYP1A2

CDK5

ALS2

DPYD

CLN6

NR1H4

MITF

KCNA2

MFSD8

GAD2

MAP1B

NAGA

MIR155

HDAC4

ADORA2A

GCK

TACR3

SMAD3

MT-TF

CDH1

SYNJ1

PRPH2

MATR3

ANXA5

CRYAB

FGF10

ANK2

MIR146A

BMP6

TLR3

DGUOK

MT-TS1

SLC25A22

TREX1

XBP1

SMARCB1

USP8

ATP2A2

GLRB

SEMA3A

NEK1

TNFRSF11B

COL5A1

ARHGEF9

HAMP

PTHLH

MAX

TGM1

GLE1

BTK

LIMK1

PPOX

NIPA1

PROC

WDR45

STS

ELP4

PAX3

NFKB1

DHCR7

VAPB

ESR2

RPE65

NDUFV2

FGA

AGRN

PITX2

CACNB2

DYRK1A

MIF

IQCB1

GNRHR

CD19

MCOLN1

GRM5

ITGAM

ACHE

WASHC5

CYP11A1

PDE10A

COX10

PNPLA6

SERPINA3

GARS1

NEXMIF

ASAH1

KISS1R

GSN

PRTN3

PRF1

IL2RB

CD27

PROKR2

C3

TAC1

MT-TH

NR0B1

MET

PTCHD1

ACADVL

COL5A2

NDUFAF2

OPHN1

CLIP2

CFH

CRB1

TSPAN7

TGFB2

MT-TW

MIR17

TGFBR1

P2RX7

RETN

JMJD1C

HADH

GTF2IRD1

RAD21

GATA4

SCN10A

CAPN3

CIZ1

PRKG1

BPTF

ANOS1

SLITRK1

ASS1

ADCYAP1

TMCO1

SDHAF2

HSD17B4

DNAJC5

PAFAH1B1

GP1BB

STX1A

GUSB

HADHB

MLXIPL

ACP5

MAP2K2

BCS1L

SPART

PC

FLG

PDE11A

HNRNPA2B1

ADRA2B

MYO7A

TTPA

CLCNKB

RB1

EIF4E

IL17A

NFIX

SHBG

ABCB1

IL7

PNKP

HSPB1

CDKN1C

MTRR

DNM1L

PPM1D

BBS1

TLR5

MBL2

HOXA1

PACS1

EDNRA

CLCN5

PPT1

CD4

ANKRD11

SLC39A14

DCAF17

GNA11

GLUD1

ADCY5

ACTA2

ITGA2

CSF1R

ARVCF

FGF2

NBN

S100B

ITGB2

TSHR

NFIB

AIP

RAB7A

PCNT

MT-TS2

F8

MDM2

STAT5B

PTH1R

PRKAG2

SMN1

SCN2B

LIG4

SLC35A3

IL1RAPL1

RFC2

STAG2

CYP11B1

ANO3

PCLO

HNRNPH2

CYP2C9

HBA2

FGFR2

DARS2

COASY

NTF3

CALCA

GJA8

FSHR

ABCB7

FGF17

PALB2

KDR

SLC16A2

PDCD1

STK11

PTK7

MIR125A

EPCAM

ADAR

MAGEL2

IGFBP3

REEP1

UROD

PDSS2

HNMT

DDHD2

TFAM

MT-ND2

IDH2

FLNC

DICER1

MIR223

NDP

CASP3

PHIP

ALPL

CNBP

RAG1

GSK3B

SORL1

ASH1L

SLC5A7

ATXN8OS

CHRNB1

PROK2

SLC12A3

DLST

PRKCD

RBFOX3

STAT4

KRT10

DNAH8

SLC40A1

DNAAF4

ALAS2

IDH1

CCL11

CYP1B1

HLA-DPB1

QDPR

LRP2

POLR3B

TXNRD2

TNFRSF13B

FLCN

UNC13A

NBAS

ALMS1

ERBB2

LCAT

AKT2

MIR126

MC2R

PIK3R1

ZEB2

MDH2

GABRA3

BAZ1B

MSX1

SLC26A4

ETFA

CAMK2A

PRKCG

ATP1A1

SLC12A1

MUSK

TK2

AMPD1

GAN

IFIH1

CDC42

CCKBR

GDI1

NSMF

TMEM127

HEXB

BGLAP

CACNG2

PLOD1

TFR2

SACS

ATL1

SYN2

DKC1

TBL2

DOCK8

WDR11

NKX2-5

LHCGR

HJV

ATP2B3

MT-ND3

ADAM10

TBX5

HBG2

TAC3

USP9X

LOC108684022

FANCI

KPTN

HS6ST1

ACTG1

SLC2A10

IFNA1

FLNB

MAPK10

DCN

PTGS2

STUB1

ALDH2

ASPM

STAR

KCTD17

ACTB

ENG

KIAA0319

SATB2

GPT

MYD88

RPL10

SIL1

HTR1D

CFAP410

MT-TQ

SLC4A1

RDH12

C4B

CHD2

CTSC

SIGMAR1

YWHAG

MIR144

GJB6

PRKRA

PON2

SCN3B

SMARCA4

PVALB

TULP1

CACNA1F

PTS

OPA1

ADAMTS13

AGRP

TPK1

FGF14

SERPINH1

FBN2

C1S

HIRA

NRG1

WWOX

PLIN1

DCLRE1C

EIF2B2

CHI3L1

MIR15A

TIMM8A

LBR

CRX

TCOF1

PDE6B

ALDH3A2

PICK1

TMEM70

TACR1

LOC102724058

LIPN

MLH3

LZTR1

PMS1

SH2B3

INPP5E

HERC2

ARSG

ALAD

LMOD3

MIR140

IL7R

NPAS2

PSMD12

SMN2

RGS2

SPRY4

MMP13

TNNI3

PDE4D

SLC33A1

HCN4

SLC12A6

OGDH

KMT2C

SOD2

SLC9A9

MIR15B

ECE1

PDX1

DYSF

SGCA

SLC34A3

GABRA6

DNA2

IL18

TRPS1

WHRN

SPRED1

IMPDH1

DNMT3B

CLOCK

ADAM17

KDM4C

MPL

FHL1

AP5Z1

TDO2

STX16

PSMB8

SOX5

GLRA1

FIP1L1

IRS1

TTC19

OPA3

SHOX

FAAH

SNCAIP

XIAP

NDUFA1

NOTCH2

FKBP10

EDN3

CNTN2

VPS13C

PRDM16

ALOX5

HDC

PFN1

TNFAIP3

SYT1

KDM5B

AVPR1B

HLA-C

AQP2

GRIA2

NOP56

PDSS1

KDM6A

GABRR3

RPS27A

CRHR2

NLRP1

PKD1

NDN

MEG3

C12orf4

HBA1

PPP3CA

PURA

GPR101

AIFM1

SCARB2

TLK2

F3

GLDC

AIPL1

AVPR2

INVS

SELP

LPL

TRPA1

UFD1

SPECC1L

XRCC1

DUSP6

ZNF804A

HNF1B

SZT2

CIITA

CDKN1B

UGT1A1

ANK1

CSF3

FLT3

MED13L

GRIN2D

HCFC1

PCDH15

BCR

TBXA2R

MIR185

TRAPPC11

IL17F

FLII

NEB

MYT1L

ANTXR2

CD8A

GALT

HIVEP2

DDX41

DCDC2

SLC1A4

TSEN54

CD36

NDUFB8

CTNND2

GRM2

DHFR

GIGYF2

THOC2

KAT6A

ANG

KCNN3

YARS2

HEPACAM

SNCB

IKZF1

OCA2

HNRNPK

MYLK

APOA2

IBA57

LMX1B

UMOD

PRPH

IRF1

OAT

SLC11A2

ARID2

TAF15

TRMU

IMPA1

SERPINA6

IFT43

MYPN

DNAJC6

TUSC3

CYFIP2

POU1F1

COQ9

SLC6A5

ASXL1

CCR1

EIF2AK3

SLC3A1

CD55

ACAD9

ELP1

PROM1

PGAP1

HARS1

SLC30A10

AHDC1

GRIA1

TIMP3

MIR210

OPRK1

LARS2

TRPV3

BCL11A

DUOX2

VIP

HSD11B2

SLC2A2

HTRA1

RBP4

MEFV

CD46

MIRLET7D

RAD51C

ADRB3

CCL5

IGHMBP2

IL12B

ITM2B

FCGR2A

SLC18A3

WDR81

CUX2

RETREG1

TCF7L2

RAD51

PCBD1

NDUFB3

MIR146B

BSND

ATCAY

CHEK2

IL12RB1

SAMD12

BMPR2

CR2

AMH

GK

DSC2

RTN4

RARA

PON3

MIR106B

SRY

PLA2G4A

IL23R

CDKN2B

CCNF

IARS2

KRT16

OPRL1

RAG2

FOXC1

PREPL

FGD1

CERKL

TPI1

ICOSLG

LRP1

HNF1A

ATPAF2

PROP1

IL1A

NDUFAF1

F7

CYP11B2

JUN

TENM4

DSG1

IL2RG

NSD2

KCNH2

HSP90AA1

SULT2B1

PKD2

CSF2

MIR483

TRIP4

FASTKD2

GRID2

IL1R1

CDK20

C1R

NPS

KCNJ5

HAVCR2

TMEM132D

HSPA4

CLRN1

SPINK5

MIR137

MSTO1

PSAT1

TRH

HSD11B1

CX3CR1

SIN3A

GHSR

AGTR2

IGF2R

HLA-DPA1

WNT7A

CUX1

CR1

CTSF

AVPR1A

BMP15

FLVCR1

OPRD1

NONO

TNXB

ADRA2A

MAPK14

CAMK2G

CYCS

ADH1C

ZBTB20

DNAJB6

LEPQTL1

SLC25A24

SRCAP

RBM8A

ANXA11

GSTM1

TOMM40

SPR

CPLANE1

WARS1

FSHB

ABL1

PRKD1

GCG

HIVEP1

COQ4

MOCS1

TRPC3

PNOC

GSR

TIMMDC1

RMRP

GCM2

SNAP29

RLIM

LCA5

PML

PAK3

GALK1

EXOSC3

CTNNA3

CTU2

SPTB

TMEM126B

HCRTR1

ARG1

PHOX2B

EIF2B5

TUBA4A

NALCN

MIR214

GNAS-AS1

TYROBP

NPHS1

TOP3A

NR2E3

PTCH1

DDX58

SLC25A1

LHX3

IL3

MIR148A

DCC

TBX21

RLBP1

IL5

PITX3

MT-ATP8

EPOR

GAPDH

GRIK1

GHRH

ADCYAP1R1

PIGQ

LRAT

SLC2A3

GRM7

EIF2B4

ITK

CUL3

KCNK4

HLA-G

ARNTL

ABCB6

ANKK1

IRF5

SLC25A11

ARSH

NTRK3

CD70

PDP1

PHF6

ARNT2

SEMA5A

TFAP2B

NEUROD2

L1CAM

WAC

MIR486-1

LEPR

CFB

EPHA4

MERTK

USH1C

EPHX1

STAG3

KMT2B

CDC73

HP

CNTF

FCGR3B

GLT8D1

RPS20

TNFRSF13C

GABRG3

CC2D1A

ISCA2

VPS11

BACE1

PIGM

MT-ND4L

DDX11

LGI4

GSTP1

RARB

APRT

VSX2

CAMK2B

PIGA

RASGRP1

PFKM

PDE6A

MIR195

GHRHR

GRIP1

MT-TE

HCCS

HOXB1

ATF6

TJP2

MAPK3

ADORA1

TRPV6

MIR93

MIR9-1

TM4SF20

TWIST2

VPS35

PIGW

NFU1

COQ6

COQ8A

WNT4

CXCL12

AIMP2

ABCA7

NRXN3

PAX8

SEC23B

HDAC9

CHGA

NEUROD1

DNAH5

CHD1

TRPM7

KCNA5

TBL1X

LCK

NCAM1

MUTYH

AMELX

ACSL4

SIX5

MNX1

TNFSF4

MEGF10

VCAM1

CHRND

CLDN16

KNG1

ATP8B1

PODXL

PLA2G7

SFTPC

MAN2B1

BCL2

HTR3B

FANCC

PIK3C2A

SMAD9

PSENEN

CHRNE

ROBO3

KCNA4

PRDM10

ADCY10

CARTPT

UBE2L3

CLU

KLHL40

LARP7

SELE

PDZD7

TUBA8

RIMS1

ABCA3

NPPB

DLG4

DGCR8

CCL3

RIT1

CYC1

ZFP57

NGFR

ITGA6

MT-TI

BUB1B

FTO

MIR320A

ADM

SFTPB

TRPM1

DNAJC3

TBX6

MCPH1

SCT

PPP1R1B

PGK1

GDF9

P4HB

ACTN4

ALDH6A1

OTX2

TRPM6

KLF1

CIT

KDM1A

PBX1

SIRT1

MAPK8

OTOF

TSHB

TCN2

CLPP

AQP4

ARMC9

LCT

ORAI1

CCN2

NAIP

MASP2

RNF135

KRT3

CRHBP

SERPINI1

MIR150

BTNL2

APOH

RPS23

C2

MAP2

ARMC5

CNR2

EFNB1

CDC45

PI4KA

CNGB1

PIK3CG

GPER1

GPC3

ASCL1

CHRNA1

DCAF8

TALDO1

PRLR

NF2

TRMT1

DOCK6

CRY2

PDE8B

TYMS

RBP3

PKHD1

MT-TV

CHCHD2

DVL1

CXCL10

ROM1

MYBPC3

TRPV1

PRPF31

GTPBP3

UCN

EYS

SLC2A4

SET

GNAT2

HYDIN

CORO1A

ZEB1

FOXE1

KRT4

FZD4

CSNK1E

TMPRSS6

CRKL

DCX

CYB5R3

UFSP2

P4HTM

IL15

PSMB9

MT-RNR1

NUP85

ARAF

CBS

PRDX1

AXIN2

NAA15

STAG1

DGCR2

FOXL2

TLR9

MIR148B

EPAS1

GRM3

GPX4

PLN

PCDH10

FUCA1

CSF2RA

ADRA1A

B3GAT3

MIR200B

BOLA3

MIRLET7I

TIMP1

CALB1

MIR204

APOL1

GFM1

TBX19

GATAD2B

ADH1B

HTR2B

C12orf57

ESCO2

SLC13A3

ASXL3

PICALM

MC1R

ENTPD1

PROS1

ATAD1

KCNK9

CIB2

SNX27

CCKAR

CBLIF

CGA

FRMPD4

MIR200A

MIR183

TRHR

VKORC1

IRAK1

CSF1

CLPB

NCSTN

ABHD12

MIR106A

MIR30D

ATG5

KMT2E

HSD17B10

DNASE1L3

M6PR

TBX20

CACNA1E

SLC52A3

COX5A

PSMC3IP

PLCG2

NLGN1

IGFBP1

POLE

FCGR2B

CDH15

GNPAT

NRXN2

PYY

MECOM

SERPINA7

AP2S1

DPP4

IFNA2

ABCC9

CRLF1

TBX22

SLC6A20

SEC24C

ALDH4A1

KCNQ5

MIR424

CDH2

ALK

CNGB3

CHRM2

CD34

VSX1

DCHS1

TRIM32

GUCA1A

CISD2

TYK2

ETS1

CLEC7A

PREP

DGCR6

PRKCE

MIR659

PLXNA2

FOXN1

CYP27A1

CPLX1

SV2A

MEIS2

IL12A

CD38

TNFSF12

ELAC2

IGHM

ACER3

ARL3

PES1

IRS2

PCARE

ZDHHC9

ALDOA

PCSK9

IMMP2L

OGT

LFNG

DSPP

ADRB1

TRMT5

CTNND1

LINGO1

HTR7

WNT10B

C1QA

PPARA

MIR99A

MIR197

ADAT3

ERAP1

MB

MIRLET7E

PRPF3

SEC63

MED13

PDE5A

PAX4

MIR34A

IGHE

GAST

AGER

C5

CEP78

ARHGAP31

POFUT1

MIR184

PHACTR1

HFM1

ABCC2

PRKCA

TBCD

POLD1

DNASE1

MIR24-1

FSCN2

TUBB1

PLCB4

IVL

RREB1

HBG1

LAMP1

IL6R

HRH3

INPPL1

GRIK4

KCNJ18

RFX6

NR1D1

HOMER1

RNASEL

TGM6

EFEMP1

SGO1

MMAA

RNASE3

OCLN

CACNA2D2

DMRT1

ICOS

IVD

INHBA

MT-TT

GNAQ

HPD

APPL1

GAP43

CNOT3

VPS53

MCTP2

NDUFA6

YY1

MTO1

MT-TL2

PTGS1

CHRM1

MIR193B

CNGA1

YWHAE

MIR142

MANBA

LMOD1

RNF168

PLCG1

PLAT

TNFSF13B

PAEP

MTNR1A

BLK

MALAT1

ESS2

RPS15

CCL4

CD80

CYP1A1

IDO1

CDKN3

SEPTIN9

SIM1

MIR532

FECH

CYP3A5

CYP2B6

APEX1

UNC13D

CRADD

ENO2

TPMT

SLC20A2

PLEKHM1

SEMA4A

KIAA0319L

CASP1

NPRL2

CA2

ISL1

CNC2

ELP2

PSMD9

FEV

PDE4B

PF4

CALB2

SCNN1A

SP1

GZMB

SEPSECS

CNNM2

MICALL2

SNRPE

NR2F2

LDHA

CYP2E1

GLO1

MRPL44

MIR432

MCIDAS

RP9

DLGAP3

CHIT1

TNFRSF8

PTPRD

STAT5A

MIR376A1

HIF1A

GRP

SNRPB

MAGI2

IYD

MIR324

LARS1

PRPF8

PRKACA

PPIG

LPP

GOT2

UCP1

MIR200C

LYN

SUGCT

ERF

STK32B

MIR198

AFP

ABCG5

RPL18

ITIH3

KCNN4

OPN4

STRADA

CASP9

SLC25A12

TOR3A

C1QB

OLIG2

MIR346

IAPP

CLIC2

TTF2

C1QC

UBQLN4

ABCD4

WASF2

PCCB

SELL

EOGT

RPL35

YWHAZ

TXNL4A

MAFD1

DLG1

ADRA2C

OTULIN

MYL1

IL17RD

IGFBP2

AMPH

PADI4

LIFR

CD274

HDAC1

KRT12

GNAI2

BCL2A1

UBB

CD44

KCNJ8

TNFRSF10A

NPTX2

XRCC2

LAMA1

CARD9

GSC

TUBA1A

MIR296

ACTN2

SOHLH1

SYK

CETP

CUL4B

ASPRV1

AUTS1

WDTC1

KARS1

TBX2

MIR199A1

RAD51D

CAPN1

KIAA1109

BACH2

RTN4R

PRKCSH

CSMD1

CXCR3

ASB10

HAND2

CNTNAP1

HMGCR

TBC1D7

SLC16A1

PDE4A

MIR134

THRA

ENO1

MAFD2

MAFD8

MAFD9

GOSR2

MDD2

REST

TBX3

DLGAP1

ZP2

IGFALS

MAFD3

MAFD4

MAFD5

MAFD6

HCRTR2

STAT2

NES

SMS

CXCL9

HINT1

ACTG2

EGLN1

MDD1

FUT2

CHRNA3

CLTCL1

CFAP47

GPT2

CXCL1

MT-TP

FOXJ1

ROBO4

RGR

MIR485

SCNN1G

FRZB

DLGAP2

PCK1

ASIC1

QRICH1

NCF1

SARS2

IL16

RNPC3

IMPA2

PDLIM1

MMD

TRDN

GRIK3

DNAJC12

PIP5K1C

SHANK1

HTR4

MIR192

ADAMTSL1

AMHR2

DUOXA2

VCAN

SERPING1

BUB1

CTSG

ABCG8

AANAT

NRGN

PRKAR1B

EML1

EGR1

POF1B

CHRM3

ITGAL

CD86

LTF

PSMD4

SCNN1B

MSMB

MMP7

HTR6

LPA

TLR1

SLC6A9

IL18R1

PKP1

UCN2

H4-16

NCOR1

MSH5

ACP1

TIMELESS

NPR2

UNG

FCN3

NT5C2

NOS1AP

CBSL

MIR30A

RHD

UROS

TGFA

GPX1

TLR7

GTS

FADS1

CTSH

JAZF1

LTBP2

HRH2

GABRR2

FBXO31

CDH13

ALPP

CYP7A1

LHB

AIF1

YWHAQ

DNAH1

NLGN2

PECAM1

PPBP

RGS4

BAX

CD69

DYT15

MCM8

MT-TN

TRIM21

MSX2

JAK1

AKAP9

RAB5A

COA3

ITCH

HSPA5

ECM1

TLR6

PDLIM5

DBN1

CHIC2

SLC17A7

STRC

SCARF2

DNAJC13

HRH1

CYFIP1

NR1H2

GRK3

PIR

CIDEC

TNIP1

SLC39A13

ITGA4

GCGR

BANK1

SNIP1

CD2

CNTN4

TOPORS

GEFSP8

HBD

VDAC1

RPS3A

MIR208A

HMGB1

ITGAX

MMAB

DLX1

PTPRQ

TFEB

ASPG1

IRF4

MIR196A1

MIR433

MIR34C

KHDC3L

RNF125

FBXO7

NAV1

SCN7A

TNFSF10

AURKA

ANXA2

CDKN2C

SOCS3

IFNB1

BCL6

TGM2

CHKA

DLK1

GEFSP4

BCKDHB

ASPG3

ATP12A

ZP3

CHRNG

FOLH1

ASPG2

PARP1

USH1G

TCHH

GRM8

CNTFR

CAMP

S100A9

PLA2G2A

ASPG4

PIKFYVE

LOC109504728

SLC12A2

SYCP3

ASTN2

APOD

H19-ICR

GABRE

SNHG14

LRP6

CAPN5

GPR50

EFHC2

NID1

SREBF1

VTN

ESPN

OGG1

MAPK8IP1

UBE3B

SLC2A9

GPD2

ME2

MUC5AC

UCP2

GPR55

PRSS1

ATP10A

ETM2

CCR7

UBAP1

ZNF462

SFTPD

NTS

GABRA4

SOCS1

FCGR3A

EIF4EBP1

AKR1A1

DPYSL2

UGCG

AHR

KRT8

INPP1

MARCHF6

ALDH9A1

MMP12

GEFSP6

EN2

CDH10

SSTR2

RCBTB1

NFIA

KLK3

GLS

DGKH

SHC1

PANK1

HSP90B1

ACO1

SRSF2

WNT7B

RPS6KB1

MICU1

KIF3A

ERVW-1

MAFA

HGF

SIGLEC5

CS

DSCAM

ATP4A

SLC6A14

IL6ST

MT-TA

H3-2

CREM

TRMT10C

KRT18

TNNC1

VIPR2

GRB2

PLCE1

GATA3

NABP1

KLKB1

ARRB2

DAOA-AS1

AVIL

NR1I3

F2R

SCGB1A1

MYO1E

MYRF

PHKG2

MRM2

GRM4

DPH1

ITIH4

PRDX5

RHOA

CHM

IL9

CA8

TLR8

SRD5A2

MIR423

CELF4

GRIK5

EPHX2

NRP1

S100A8

FABP7

LAT

RAB8A

TAF6

DPP10

CCR3

LCN2

STAT6

YWHAH

NIPA2

XRCC5

ALX4

SSTR5

PCSK1

CSMD2

GLYCTK

F2RL1

DISP1

CCL17

SOX2-OT

KRT7

TOP1

TACR2

PAPPA

STMN1

HTR5A

SLC1A7

TENT5A

MIR27A

CHRNA5

ASMT

IL33

IL11

MST1

TIMP2

VIPR1

MMP8

ARHGAP11B

PENK

IRF3

PTGDS

LRP8

CD5

NPAS3

HLA-DRA

FGF1

XRCC6

MIR330

CD68

COL25A1

SDK2

GDF15

MX1

CMA1

IFNAR1

AFF4

CFHR4

DBT

NOTCH4

NEAT1

PAND2

PTER

RINT1

DHODH

AKR1B1

TUBB8

VGF

HLA-DQA2

SNURF

MICA

FOXO3

FTCD

GLRA2

FCRL3

CDH17

ALOX5AP

PNMT

POU5F1

SP4

LGALS3

RHEB

FOXD4

LIPE

KLRK1

MIR23A

HDAC2

MGMT

SDC1

SMARCA1

RAN

CACNA1I

ATP5PD

SNCG

SLITRK5

DUP7Q11.23

CDC6

FNDC5

REL

MED12L

NTNG1

FHIT

MACROD2

BCKDHA

ITGA1

DACT1

A4GALT

IL1RAPL2

HGD

PER1

TLR10

HIP1

SLC22A3

BRD2

NOX4

MUC7

BAMBI

ABCC1

STK39

MBNL1

PAND3

BAIAP2

GRPR

CKM

SLC7A5

TNFRSF10C

PTPRN

MIR212

UTRN

GALNT17

IL12A-AS1

MLX

SRF

TUB

TEF

FIS1

APAF1

MIR657

ALOX15

AQP1

CXCR2

ALAS1

TRANK1

HTR1E

RBX1

CDK2

XPR1

HAPLN1

EXO1

IL10RA

GABRR1

WNT2

HCN2

PKD1L1

CXCL13

NDEL1

GLP1R

NRCAM

BUD23

EPM2AIP1

TP73

CENPB

KNL1

MAN2A1

MMEL1

CCNA2

MIR92B

CES1

NT5M

IL4R

SLC6A18

CHRFAM7A

CA4

SYN3

RPS6

TJP1

ST14

ARR3

EMP1

PCDH11X

CMIP

HTR3C

PRND

UBAC2

PSMD5

SLAMF1

IL21

SLC11A1

HAVCR1

DPYSL5

AIM2

DYRK1B

MTMR10

MIR509-1

DIO2

TAF1L

SULT1A3

RECK

SHMT1

SMARCA5

AOC3

CD1A

MAPK7

PTPRN2

GGT2

NCAN

GLRA3

AMBP

OTUD7A

CALCRL

FEZF1

LGALS1

ELOC

HLA-DRB5

CCL26

TRPM8

PLEK

AS3MT

FZD9

MCHR1

ELP3

COCH

ANPEP

VPS13D

OSM

NQO1

CRIPT

FKBP1A

CCL21

ISG15

BDNF-AS

ECA1

TRPM3

IL23A

CD14

GGTLC3

H2BC21

TRPC1

CADM1

PAWR

FLRT3

PXK

PPP1R15B

KCNJ13

PIP4K2A

KIRREL3

STIN2-VNTR

ULK4

SGK1

IRAK3

NPPC

SSTR1

ASIC2

SMCR8

SCARB1

PTPA

POSTN

CCR2

TSLP

GABRQ

PRSS3

ALS3

NOP2

ADCY1

YWHAB

CEBPD

GLIS3

CACNA2D1

FCER2

ACE2

CKAP5

NR1H3

ARC

AGAP6

XRCC3

CACNG3

KLRC4

SMAD7

CACNG5

FMR1-AS1

PTLS

FMO3

CDR1

HLA-E

HSD3B7

SSB

ZNF408

FXR1

FABP2

EIF4H

AGFG1

RAPGEF3

COX4I1

PTX3

IDE

ALS7

RAB7B

CCR4

SNRNP70

JAKMIP1

ADRA1B

LIF

SEM1

CD1D

PUS10

CPT1B

MIR381

ANO2

RAD23B

FGF9

MICB

SRD5A1

SULT2A1

FGGY

ADGRL3

FKBP4

SFTA3

LHFPL5

ESRRA

GPX3

HNRNPDL

ADGRA3

IRF7

B3GNT2

CADPS2

MLPH

CHGB

MTF1

PEX5L

DUOX1

TOR1B

HTR3E

SLPI

LDLRAP1

CSN1S1

GCLC

NSF

PTGDR

RCC1L

BECN1

CDR2

LRRTM1

RUNX1T1

GDF2

TMC1

KRIT1

MARCKS

RPS6KA1

PDPK1

TCF12

PDCD10

BTBD9

GFRA1

CYBRD1

H4C1

USP18

TIAM1

ANGPT2

GTF2IRD2

MMRN1

NLRP5

KAT2B

HHEX

PVT1

SNRPD1

OXA1L

GTF3C1

INPP5B

LMX1A

ZNF385D

MIR765

FXYD1

SLC26A1

CSRNP3

MGAT1

SLC25A17

TNFSF13

CCT3

ABCC3

IQCK

NIF3L1

GJD2

TXN

MSH3

DSG3

BAK1

MLST8

PIK3C3

CD7

SLEB3

TNFRSF4

GRM6

GREM1

SAT1

BST1

STH

SLEB4

SLEB15

SLEB5

SLEB7

SLEB8

SLEB12

SLEB13

SLEB14

APBB1

NPR3

PLEKHB1

LOC106029312

IPO11

INHA

RICTOR

CELF1

MIR151A

SUPT5H

GPI

CCM2

CYP2A6

CDH9

CAMK4

MYO15A

PLD1

DAGLA

SETDB1

SERPINE2

EPX

CD22

OAS1

GYPB

KNOP1

RNF43

MIR152

H3C14

GPR65

GPC4

SMARCD2

CELF2

CXCR1

MANEA

HMOX2

P2RX4

VEZT

CLEC16A

ATF4

GSTT1

PTGER2

DCLK1

FADS2

GRIN3B

CD247

AMY1A

TSN

PPIEL

NRG3

OGA

ID2

DYNLL1

NEDD9

HYAL1

VSNL1

TAOK2

HSPB2

CXADR

MDGA1

MAPRE3

IGLON5

EHD4

CCL20

PEG3

NR2E1

INSL3

SLC18A1

NEFM

SCNM1

SACM1L

UBQLN1

EIF2AK2

PRSS8

NCS1

PEMT

GNAT1

ALDH3A1

SLC5A5

CAPN10

SLAMF6

MT3

SYCE1

CLPS

CXCR5

C4B_2

FGF21

PTPRG

RPTOR

CD1C

HLA-DRB3

LAT2

EEA1

CCDC141

FGFR1OP

MDH1

LHX8

GPC6

CNP

NSUN5

UTS2

TSPAN12

TOP2B

SLC4A4

SYNJ2

DUP22Q11.2

USP6

PLVAP

C5AR1

EHMT2

PRG2

GGCT

ELOVL5

CALY

LIN7A

OMD

CDH8

PRDM9

HBS1L

DEL16P13.3

PNPLA3

LINC02694

DROSHA

DUPD1

GADL1

CD209

TPT1

ATP2C2

UBN2

LXN

LMO4

TRIB2

PHF1

GYPA

ITGAE

TMEM230

ADH1A

COMMD1

PPIA

GABARAP

MLN

BTBD16

FCGR1A

ADAM33

MEI1

DLG2

CDC25C

ZFHX3

DNAJC30

CA10

PTPN2

XIST

PPIP5K2

PPM1G

FDFT1

DVL3

SSTR4

TPPP

RIT2

GNB1L

MFSD2A

ADH4

DSC1

GC

MT-RNR2

GABARAPL2

GPSM2

LOC106029311

LOC106029313

H2AC20

SH2B1

HS6ST3

ZNF620

TNFRSF25

NCKAP1

CCL7

SGCZ

SPIB

AREG

TNFRSF17

TPSAB1

GNLY

CNTN1

SLC6A13

WAPL

ERC1

P2RX3

MIR128-1

ST7

AGO2

DDB1

VAMP7

CAMKMT

MEF2A

FABP4

GPD1

CRELD1

MTDH

MHRT

GNA15

MIR574

TNKS

HLA-DOA

LSAMP

IL21R

CGB3

FBXW7

GPNMB

H4C13

LNPEP

GTF2IRD2B

KAT2A

CARS1

CKB

DDIT4

PCSK1N

NEUROD6

NAALADL2

CCS

STK24

CX3CL1

RYR3

HLA-DMA

FRAXA

PCSK2

ORC4

DRC3

DIAPH2

STMN2

KCNJ12

FXR2

IER3

DGCR6L

GTF2IP1

CTTN

AFG1L

ZDHHC8

LIN7B

IL31

PPP3R1

CPE

KCTD3

PRDM1

CCL22

SETD1A

CLDN4

TPPP3

MYO3A

RO60

NPY5R

AKT1S1

CSH1

E2F1

SHOX2

IL3RA

GABARAPL1

NR1I2

IL12RB2

CLPX

LMO2

ASRT3

ASRT4

ASRT6

CD1E

ESRRG

GPR37

SLC25A6

LPXN

PTPN3

SELENOS

MIR130B

TMEM126A

ALYREF

MXD1

NEU4

CRYZL1

TRAPPC2L

IPPK

EPS15

CAV2

ERDA1

NAV2

SLC17A6

SLITRK2

SCGB3A2

CSK

FHL5

HPX

MIR92A1

S100A6

SMIM30

KCNK18

LAX1

CD1B

HKDC1

LAPTM4A

LY86

MAP4

UTS2R

DUSP1

CA5A

FKBP6

MELTF

GLRA4

LPO

MIR484

ALLC

ZNF365

ACKR1

LRRC7

FAHD2A

NAT2

MTRNR2L5

LRRTM3

SMPD2

LHPP

SLC3A2

ESPL1

ARG2

ERG

GZMM

NISCH

C3AR1

H4C11

RFX2

PRR12

MIR95

HBB-LCR

MRT25

VPS54

KAT5

GMDS

HSF1

PPIF

WNK3

VPS16

COPS3

HIP1R

MRRF

GCFC2

EXOSC10

YIF1A

PGF

COBL

CCR8

ELOVL6

H4C6

INS-IGF2

MNT

IST1

WNT3

SLAMF7

FAM20A

LOC102723833

ZNF74

MBD1

NUDT10

SULT1A1

ALDH1B1

POGLUT1

WDR83

SLC27A5

FCN2

NOBOX

FARP2

LOC106627981

PINK1-AS

SERPINB5

TIMM13

CENPC

SLC30A8

ITGAV

H4C9

H4C8

CCL24

GABRG1

APLNR

H4C2

RNF112

H4C3

PANX1

H4C4

H4C5

ATP1A4

MIR181D

LOC106020711

LOC106020712

CGGBP1

VDAC3

FIGLA

ADAM8

CTCFL

LINGO2

ANCR

AFAP1

SIK1B

PJVK

PSMA5

ADORA3

METTL27

DBI

KCNIP1

NSUN7

TMIE

CLDN3

ATOX1

TMX3

MCM9

KANTR

CHRD

CUL2

DGCR5

H4C14

UBR3

MDGA2

VAPA

H4C15

CH25H

ADORA2B

TSNAX

GTF2IP4

DRG2

IFI16

RSPO1

HOOK1

H4C12

SYNCRIP

RABAC1

CHRNB4

AKR7A2

DEPTOR

AGO1

DOCK4

ABHD11

HK2

LLGL1

ENSG00000202498

SLC12A4

MAPT-AS1

MAPK9

HLA-DRB4

NBEA

DLAT

SLC31A1

MIEF2

TIMM23

LOC106020709

LOC106020710

KIFAP3

IL1RL1

MPP5

ARHGAP1

MCM5

KCNQ4

SNRPD3

CHPF2

POLRMT

LOC108745275

LOC108745276

ACP2

LY96

RAPGEF4

LGR4

PSMC4

NOD1

SOGA3

DCANP1

CYSLTR1

POFUT2

ASRT8

KLRC1

DIP2A

CHRNA6

ESCO1

CLEC4C

MOV10

PSORS1C1

GPX2

FPR1

JARID2

RAB11FIP5

GMCL1

EGFLAM

OMP

KHDRBS3

ASIC3

SCFD1

LIMK2

RABEP1

CGAS

AGBL2

SNAP23

GPHA2

GIPR

DCDC1

LINC02153

PPP3CC

COL19A1

SCG2

OTOA

FMO5

NTSR1

RSU1

RPSA

NEUROG2

CLINT1

PTTG1

RMDN3

GAS6

PPP1R3C

MXD4

TTC3

WDR41

BCL7B

POM121C

RBMX

NUP188

DCTN2

PCDH17

PTGDR2

AKAP10

FCER1A

ODC1

NKX2-6

RASD1

LY9

SLC22A2

KANSL2

RNU6ATAC

PRR5

LOC109610631

CCL19

ARHGAP11A

PLA2G4E

SEZ6L

XPNPEP2

PPP1R3F

GPR89B

LINC01108

LINC02152

ADH6

MS4A2

HBE1

KCTD2

SPRN

AP3M2

GPR89A

MYO9B

CDC27

HS1BP3

RNF19A

TXNDC15

FNDC3A

CXCL5

NSUN5P2

STUM

IGFBP6

CCL13

SLC22A6

STX10

MAPT-IT1

PDXK

MIEF1

NSUN5P1

GTF2IRD2P1

SAMD11

SLC19A1

RB1CC1

LRRN1

ENPP3

STAG3L2

INSM1

IGES

TRIM50

KAT8

KAAG1

E2F2

PIP

AKR1C1

RRM1

WBSCR23

FABP3

CD83

SMCR5

TMEM270

NMB

RPLP1

B3GAT1

GALR1

USHBP1

TAOK3

RPLP0

MGRN1

RRAGC

INSM2

CD276

RHOD

TTLL1

ZNF526

MIR491

INA

MGR6

RIBC1

WDR20

HIRIP3

SERPINA4

GREM2

TIMM23B

ERCC6L2

HLA-DMB

TFB1M

SYNPO

TRAT1

DLEU2

ENSG00000277767

IGFBP5

TRIM74

AGAP1

NAA50

SDC2

LRRN3

ERFE

ATP5PO

KCNK10

STAG3L4

RAD21L1

MTMR7

MIR652

AADAC

MIR638

CYSLTR2

STAG3L3

GPR108

SPDYE1

CNTN6

ZNF778

UGT1A9

VPS37D

STAG3L1

ADRA1D

IGF2BP2

MYO10

KCNC4

TRIM73

SPDYE7P

TAP2

ANKRD50

SCGB1D1

PTPRD-AS2

ALKBH5

IMMP1L

SPDYE8

SPDYE14

MUC16

KHDRBS1

SPI1

LOC108663987

TNC

LOC108228208

LOC108228209

SNORD133

RAI14

STX17

ADPRH

PLIN3

GPR3

BAZ2B

PSMA7

ABHD11-AS1

GRIN3A

EFS

ACOT7

MIR1185-1

MTMR9

GOPC

MAP2K5

CHD6

PKP4

DYNC1I1

CNOT8

TNMD

FGR

NUCB2

ATG13

YPEL1

LINC01546

WBSCR2

PPID

ATG16L1

TBX10

SSRP1

SMTN

LOC109029536

PRKX-AS1

LRRC37A

EIF4HP1

SPDYE12P

SPDYE10P

SPDYE13

SPDYE15

SPDYE9

DOP1B

GLYAT

MIR494

HTR1F

WNK2

UTP6

NEGR1

ACKR2

REEP5

MGR2

PSPN

NME1

PDS5B

SP100

UBR5

DNAJC24

RXFP3

SCG5

ATG4C

INHBB

ICA1

ZNF470

MIR608

CHIA

RIPPLY3

ATE1

F2RL3

RCN1

POLR3H

DMRT3

ERICD

ENSG00000266919

SIGLEC7

GTF3A

LY6E

MMVP1

SKA2

LNX1

CLCA1

SUPT4H1

MIR345

C1orf210

RANBP1

KCNK12

CLEC4E

GEMIN8

CNTNAP5

ENSG00000179253

IFIT3

DEL10Q26

MMVP3

DUPXQ25

DUPXQ28

C6orf62

PDIA4

NEK11

MED7

GUCY1A1

RBBP5

CDIP1

TCF15

PGRMC1

CKAP4

EPHA6

PMCH

BDKRB2

ANKRD31

CDCA5

SYTL4

MAU2

SCLY

VDAC2

CAMKK2

LIN7C

PTCHD1-AS

NUP210

CHML

CPQ

MED31

PGLS

ADCY9

SLC1A5

ASZ1

COPE

TAGAP

RPL7

MRAP2

MTHFSD

GTSCR1

CXorf21

ALDH1A1

THADA

RPL7A

SNX13

BARD1

NIPSNAP1

ADCY8

RAB35

ADAD1

IL18RAP

PCDHB14

PDS5A

FBLN2

CCL1

TTN-AS1

WNT11

GALNT11

PITPNM2

EPSTI1

KEL

NPR1

CBLN1

FAM167A

BTC

GNA14

CAMK2N2

CCDC85C

SEPTIN7

FXYD7

NCOA2

ZDHHC24

AHSP

ABHD16A

CWC27

CCR9

MTOR-AS1

IL5RA

DPY19L1

SRR

REC8

OSR2

SPPL2C

CALHM1

TSPOAP1

SERTAD3

MIR325

MIR582

ATP13A4

GBX2

MTNR1B

WWP1

P3H3

HIPK3

MIR598

NUP42

SLC35E3

PCBP4

UBE2QL1

CAMSAP2

TMOD2

ELF3

PSMC6

PDE3B

DRAP1

SSTR3

KDM4A

CENPA

ADH5

SYBU

KLRD1

SF3B6

ZNRD1ASP

LOC109461479

CLEC6A

MIR431

GET1

PRNT

C10orf105

MIR18B

DHRS11

SMAD1

LTA4H

ANXA6

PCDHB1

PAICS

SOHLH2

MIR539

TMEM238

MTUS2

ARRB1

PLB1

ZNF569

UGT1A

CA9

MIR3187

CACNB1

RPL23

WDR5

PLS1

FBXW2

HLA-DOB

AREL1

MIR4492

MIR1268B

FAM149A

PHF11

ZCCHC12

DUSP11

SKAP2

DEGS2

NXPH1

CSAD

GIMAP5

CA1

GRK2

DAZL

CLDN2

ETNK1

LTK

LOC108449888

RRAGB

CSNK1A1

LOC108449897

IGFBP4

ULK1

LRRFIP2

RNASE2

RRAGA

GLG1

AHSA1

GRK5

FAU

RUFY1

MED9

TMEM132E

MIR488

FBXL5

MED10

CUL1

MOB2

MAN2B2

SLC15A2

CAPRIN1

LTC4S

B4GALNT2

TRIM68

IRAK1BP1

NFIL3

LYPD1

TIMD4

SGO2

SMC5

PACSIN3

CHRM5

MIR615

SULT4A1

EMC3

SUB1

RBMS3

SLC7A1

ASH2L

GEMIN7

SNAP91

RNH1

RASGRP3

ETS2

SLC6A11

MAN2C1

TADA2B

CBLL1

RBM45

LTB4R

SEC14L5

TSPAN6

DGCR10

WBP2

PHETA1

PTGER3

VWC2

RXFP1

ZNF750

SEMA3C

MIR511

COL26A1

ATF1

SLC5A11

NINL

BACE2

SLC36A1

CXCL16

PSMD14

ARRDC4

DGAT2L6

HMSD

GLYATL1

NBPF9

MIR500A

FAM183A

OSGEPL1

MIR503

MTERF1

DAND5

GUCY1A2

AGR2

MPPED2

ADAMTS19

ENSG00000264881

TEX28

KIAA1586

SLC12A7

UHRF1BP1

QRSL1

SNRPB2

SKP1

PGA4

MYH8

IL17C

NCOA1

MIR611

TCF4-AS1

SHROOM4

CD72

CELA3B

LGALS8

TAAR2

RPS19BP1

ELP6

RAB6A

ERAS

CLNK

PHRF1

MAPKAPK3

KDM4D

ULK2

C14orf178

CHTF18

MIR637

CORT

LRRC37A3

MIR663A

ZFYVE21

LOC108783645

CYTL1

CENPS

SLC15A4

TSPY1

WBP11

MIR518B

MIR596

PPP1R3B

NPY1R

ORMDL3

YRDC

JMJD8

TOM1L2

FCER1G

MIR302D

SLC15A1

NPY4R

DMRT2

NCKAP5

UCN3

MATN1

ARTN

CD180

SLCO1C1

RNR2

GCLM

TRMT61B

UBASH3A

HBQ1

RBFOX2

TAS2R42

HCP5

CYTH1

CAMK2D

INPP5J

SLC47A1

SPECC1L-ADORA2A

NATD1

MFAP4

LDLRAD2

KCNK2

DIAPH3

ORMDL1

PYCARD

ARHGAP27

EPN2

LINC02210

MIR662

MIR622

CHTF8

MRPL58

PBRM1

SLC1A6

RXRG

SULT1C3

GID4

RCAN1

SIGIRR

RASGRP4

DUSP13

OR1C1

NOVA1

DGCR9

SMCO1

ULBP3

RTL10

CER1

PRRG4

AGBL3

C9orf50

TCERG1

WIZ

RNASE13

NSD3

WSCD2

MIR583

SMC4

MAP6

GYPE

IL13RA2

LRRC41

DYT7

RASSF1

C5orf15

SMIM1

PITRM1

ACOT2

OXER1

LOC106014249

MIR769

MIR654

MIR642A

IMPACT

CDK5RAP1

PRSS3P2

SEPTIN5

PPY

MIR575

MPPED1

FCGBP

COMMD9

GABRP

SNORD97

TSC22D3

MIR601

MIR612

MIR629

MIR557

MIR658

MIR600

MIR602

DENND1B

ITGA9

LOC107982234

MIR135A1

RNASEH2B-AS1

LRRC37A2

GIT1

MGLL

CREB5

RAD51L3-RFFL

CALCB

SOCS2

LOC111258525

NOL7

CCDC144A

SMC6

SMC2

LILRA4

RXFP2

CCDC85B

BTAF1

PTPRH

CHMP7

GSDMB

SCAF4

GPR22

PEBP1

NPB

SLC39A1

CCDC136

NOP9

IL9R

KANSL1L

WDR70

PRTG

DEFB119

BPIFB6

CDX4

CELIAC5

ELOB

TBC1D25

SLC6A15

SPTBN5

SRP68P1

NMUR2

PDE4DIP

SLC26A7

CSAG1

INPP5A

PTPRU

SMCR2

SMCR6

SSR2

ERP29

CAB39L

LALBA

LOC109461475

TRIM9

CGB7

CA3

PLD2

PTPN5

FAM163A

FBXO33

MRGPRX2

FGF20

YBX2

SLEH1

SLEN1

SLEN2

SLEN3

LOC101929089

PCNX2

NOL10

F2RL2

SPATA13

ERBIN

MIR367

GULOP

GSM1

B3GALT5

ANXA10

CPA3

NBPF10

CEP250

DCAF7

MEF2D

ETV3

SEMA4C

PLPPR3

C16orf87

SPIRE1

LOC108660405

CNTN5

DDX4

ATF3

STPG3

TCERG1L

SMOX

PPM1H

TBC1D9

NPEPPS

GALR2

GFOD1

ICE1

DNAJC15

ACP3

CNTNAP4

CWC15

QTRT1

MROH7

SNTB1

AOX1

TOP3B

TSNARE1

INTS4

AMOTL1

CIB3

UMODL1

UGT2B15

SNORD35A

TRL-AAG2-3

GNAI1

SYVN1

TMC2

VAV3

PDE3A

GALR3

P2RX2

PLEKHG4B

NPY2R

RNF122

LINC01405

LOC105372310

SLC25A31

BMX

SHMT2

NBPF11

LGR6

MRXSL

TTC23

TDRD3

IL13RA1

CDHR3

MED15

RGS1

RAMP2

NIPBL-DT

GLCCI1

CHRNB3

ZNF428

CETN1

DSCC1

EGLN2

RAMP1

NSMCE4A

EGLN3

EPHB1

SMC1B

IL19

RPL29

UGT2B7

CDKAL1

RPL36A-HNRNPH2

ATP11AUN

FAM92A

CPNE9

FGFBP2

POU4F3

TNFRSF21

SFMBT1

TSPAN2

ARFGAP2

DENND4C

PLCL1

PDE2A

C2CD5

MIR3671

IKBKE

SLC7A11

ATF2

SRGAP2C

MEX3A

OGN

MIR4278

PTPRF

FPR2

FBF1

ZNF695

EPB41L2

KCNIP3

SLC22A14

SLC4A7

EIF4ENIF1

AKR1C3

DHRS9

ZNF665

DPH3

ESD

DYRK4

RANGAP1

RAB29

PREB

AKR1C4

TTC7B

URM1

CYB561D2

NPSR1-AS1

RABEP2

LINC00976

CCDC50

RAMP3

RPP38

SORBS1

HOMER2

FRAXE

NOVA2

SPO11

NLRP6

HMGN1

DOCK1

CEP19

LINC00051

WNT2B

TNR

MIR4539

TFIP11

ZNF589

IGF2BP3

ZNF544

MADD

MC3R

BSPRY

ZACN

HSPA2

ASGR1

ANXA3

CACNB3

LINC00570

FAM155A

CREB3L4

ST3GAL1

UBA7

MFAP3L

AZIN2

OR52B2

OR5K1

ABCC11

MBD6

PCP4

SCGN

DCTD

LOC108660404

LAP3

PDC

SCHIP1

GGA3

KANSL1-AS1

PRKAB2

CHAF1A

CENPQ

GRXCR1

FAM107B

OR8A1

HOXA3

MCU

IL20RB

CLTRN

DLEU1-AS1

CPED1

PAX8-AS1

ST8SIA4

OR6P1

MILR1

TPPP2

LINC00578

AGAP2

COL22A1

LOC107032825

PLPPR5

UNK

PTAFR

MEIG1

DHX58

KCNS1

MSH4

GGT3P

CA12

SMDT1

MRPL40

KCNG1

CA5B

TRPM2

LOC106736476

LOC106736477

DYRK2

RPS4X

MAGI1

TLE3

SIM2

XPO5

CENPN

NAT1

WNT5B

ZNF764

NT5C

GGH

SMG1

CPEB1

YLPM1

PDZK1

SDK1

TAS2R38

MIR449A

FZD1

TMPRSS5

HTR3D

FABP5

PALM

LETM2

NDUFA5

PFN2

RAP2A

SP3

BAIAP3

MIS18A

ABHD4

NMUR1

ACYP1

CELA1

SYCP1

MRPS5

MIR138-2

CDHR2

ADCY2

GOLM1

BDKRB1

STRA8

LOC106736468

LOC106736469

MPP3

RPH3A

KCNA6

NEUROG1

BRSK1

KLRC2

CCDC122

FZD7

DTD1

ATAD5

SLC6A12

ZNF827

WNT9A

DENND1A

TTLL5

ARL17A

NRG2

PPM1F

CA6

PSMD13

ITIH2

KPNA3

MYO7B

CDC123

RAD54L2

HSD17B1

INTS10

LOC102724770

SLTM

SIAH2

HIC2

TMEM150B

AGPAT4

DACH2

CDHR5

NANOS3

ANKS4B

VASH1

MZB1

PKD1L2

GCM1

BATF2

GNL3

AIFM3

CLRN1-AS1

LINC00461

ITIH1

ASB1

TSSK2

SLC17A8

KCNS2

EVA1C

MIR1306

MYO1H

MIR5087

FBXO45

ABI3BP

LINC01090

NUDT9

CHRNA9

CYB561

DLG1-AS1

NMU

LOC106728418

SESN1

SMURF1

PLEKHB2

SLC7A4

SPTLC3

NR2F6

LRRC74A

MIR502

LOC158435

RAB11FIP4

PGBD5

YDJC

FTSJ3

RGL1

LOC109951029

CLRN3

LINC00624

GNRHR2

ADO

MIR649

MIR3618

SLC25A45

CISD1

DGCR

TBRG1

PLCD4

LASP1

MYO1C

NTSR2

GNRH2

PTPRT

UGDH

DCDC2C

RPS4Y1

STIMATE

PTN

MSRA

CAPN9

FAM230B

NEK4

ENOX1

DVL1P1

OLAH

BFAR

STAB1

CCDC34

PPIAL4D

TMPRSS9

IFNA4

POGLUT2

YPEL2

PLCXD3

ABHD13

SNORD79

XXYLT1

NENF

DCP1A

MIR4717

NPFF

USP25

TNIP2

DYRK3

GPR85

NOLC1

LINGO4

MCPH1-AS1

SLC9B1

MYRFL

IGSF5

METRNL

NCAM2

SPATA8

FNBP4

ANGEL1

MIR579

ENSG00000228352

SLC25A16

ASTN1

EPS8

MAPK1IP1L

RIMBP3B

LINC01193

KBTBD3

PKD1L3

SETD4

P2RY14

GSX1

LOC105378311

MT1A

ZRANB2-AS2

LOC150051

RPL21P24

ANKRD44

TECTB

ARHGAP35

TRIOBP

FMOD

DUOXA1

PRRG2

FMNL1

NEPRO

GRK6

PFDN2

ZNF575

CACHD1

DHX36

PTPRR

GPR158

PTPN4

GFRA2

JPH4

DLGAP4

CISD3

FBXW11P1

FSTL4

ZNF329

EGID-105180392

BNIPL

RNY5

CCL28

CASC4

RPS20P10

HSPA14

UACA

MICU2

SLC4A10

LINC00364

MIS18A-AS1

ENSG00000238280

RNU1-138P

ENSG00000272243

RN7SKP114

ENSG00000273091

lnc-B3GLCT-2

ENSG00000285838

ENSG00000278305

RF00017-3684

lnc-ADO-3

LOC105370150

ENSG00000219736

ENSG00000286564

FUT5

SEMA3G

SEMA3F-AS1

BORCS7-ASMT

TPRA1

FAM126B

MAP1LC3B

TWF2

CALCOCO1

LMCD1

CYP3A7

GFRA4

OTP

SPRTN

KIAA2012

LOC100506321

C16orf46

TEDC1

DNAJC17

CAMK1

PPM1M

WDR82

BCAS1

AGMAT

GXYLT1

PRRG1

SEMA3B

SLC5A4

FLYWCH1

SEMA3F

SLC24A3

KIAA2012-AS1

RFTN2

WDR91

L3MBTL2

KCNA3

VWA5B1

ASGR2

SMIM21

LOC108167315

CNTN3

NT5DC2

IKZF4

CCDC27

PLEKHG1

MUSTN1

NDUFB4

FAM120A

GMFB

GOLGA6B

MAPKAPK5

BMT2

KLHDC4

NSUN4

PTPN23

NDST3

H3C12

CA13

GALNT12

RPS6KL1

RFNG

CDH22

CA14

CA7

CIB4

MRPS17P7

NEUROD4

NKAIN2

MIR4523

MIR6084

CYCSP6

MIR663AHG

NLGN4Y

TMEM219

SLC25A5P2

RYBP

KCTD10

CADM2

GCHFR

BRS3

CLRN2

B3GNT4

POGLUT3

SNX7

MACIR

ZC3H7B

MFNG

LOC101927967

CDNF

SETD6

PLXNC1

HSD17B2

ADGRB1

AMY1C

ST8SIA1

ST6GALNAC3

LOC108281110

EDIL3

MIR3065

MIR1193

H3-3B

LEO1

GPR151

NSMAF

RPS3AP1

MTCH2

BORCS7

GOLGA6A

RBM6

CPM

AMY1B

RTP3

ETV3L

TMEM178A

GPRC6A

TBC1D10A

ARL5C

GPR149

SNORD69

SNORD19

ORMDL2

HYAL3

LINC02210-CRHR1

OR4X2

FAM174A

RRP9

SNORD19B

ITGAD

PLXNA4

ADTRP

NOL4

SUV39H2

CYCSP52

ARHGEF26-AS1

NMT2

ZFYVE19

TAAR1

RPS15AP34

RBM27

TMEM18

RPL38P2

BCAS3

RSL24D1P11

DDX42

ST13P11

SERINC5

TMEM150C

SMIM4

LY75-CD302

DZANK1

GFRA3

RPS26P6

RPL31P55

CAPZA3

TMEM59L

ZNF331

PINX1

RLN3

B3GNTL1

STIMATE-MUSTN1

UTS2B

PLEKHA6

SAP30BP

IGSF21

C1orf131

ARL5A

SFXN2

CALHM2

RPEL1

SGIP1

WBP1L

ABHD14B

IGSF11

MYHAS

ZDHHC7

AATK

RPS9P4

CYCSP42

MGAM2

SLC38A3

ERLNC1

PTH2R

MIR5007

SOX7

LOC343052

PPIAP30

PROX2

MFSD13A

NPVF

FAAH2

RPL21P112

RPL31P4

CTAGE1

RPS27P21

C4orf51

ZC2HC1C

RBM5

OR1A2

MIR891A

CC2D1B

ZCCHC14

MIR3143

C15orf62

TMEM161B-AS1

C1QTNF4

LINC01876

TMEM115

MIR876

MIR8064

SNED1

LRRC37A4P

RHOBTB3

ZNF668

ETNK2

CIPC

C1orf198

SOX13

ACTL8

WDR18

RNF40

SULT1A2

GLYCTK-AS1

FBRS

HEMK1

GOLT1A

SPATA32

ACBD7

C8orf86

RPP38-DT

LINC00303

LOC286083

ZNF350

HCCAT5

LINC02085

LINC00507

LOC101927604

SMIM20

GPRASP1

VENTXP7

RBMS2P1

LINC02264

LINC02411

LOC105369911

RPL10P2

TRIM65

SYNDIG1L

LOC109611591

MAPK4

SGSM3

FBXO44

FCF1

NOXRED1

LRRC52-AS1

LSMEM2

RAB9BP1

SIGLEC10

C1orf53

DENND4B

LINGO3

# Supplementary table4| Common targets of Wendan Decoction and Generalized Anxiety Disorder

| Herb | Common Target |
| --- | --- |
| Pinellia ternata (Thunb.) Makino | ADH1C |
| Pinellia ternata (Thunb.) Makino | ADRA1A |
| Pinellia ternata (Thunb.) Makino | ADRA1B |
| Pinellia ternata (Thunb.) Makino | ADRA1D |
| Pinellia ternata (Thunb.) Makino | ADRA2A |
| Pinellia ternata (Thunb.) Makino | ADRA2C |
| Pinellia ternata (Thunb.) Makino | ADRB1 |
| Pinellia ternata (Thunb.) Makino | ADRB2 |
| Pinellia ternata (Thunb.) Makino | AHR |
| Pinellia ternata (Thunb.) Makino | AKR1B1 |
| Pinellia ternata (Thunb.) Makino | AKT1 |
| Pinellia ternata (Thunb.) Makino | ALOX15 |
| Pinellia ternata (Thunb.) Makino | APOD |
| Pinellia ternata (Thunb.) Makino | AR |
| Pinellia ternata (Thunb.) Makino | BAX |
| Pinellia ternata (Thunb.) Makino | BCL2 |
| Pinellia ternata (Thunb.) Makino | CASP3 |
| Pinellia ternata (Thunb.) Makino | CASP8 |
| Pinellia ternata (Thunb.) Makino | CASP9 |
| Pinellia ternata (Thunb.) Makino | CCNA2 |
| Pinellia ternata (Thunb.) Makino | CHRM1 |
| Pinellia ternata (Thunb.) Makino | CHRM2 |
| Pinellia ternata (Thunb.) Makino | CHRM3 |
| Pinellia ternata (Thunb.) Makino | CHRM5 |
| Pinellia ternata (Thunb.) Makino | CHRNA2 |
| Pinellia ternata (Thunb.) Makino | CYCS |
| Pinellia ternata (Thunb.) Makino | EGLN1 |
| Pinellia ternata (Thunb.) Makino | ESR1 |
| Pinellia ternata (Thunb.) Makino | F7 |
| Pinellia ternata (Thunb.) Makino | FOS |
| Pinellia ternata (Thunb.) Makino | GABRA1 |
| Pinellia ternata (Thunb.) Makino | GRK6 |
| Pinellia ternata (Thunb.) Makino | HIF1A |
| Pinellia ternata (Thunb.) Makino | HTR3A |
| Pinellia ternata (Thunb.) Makino | IGF2 |
| Pinellia ternata (Thunb.) Makino | JUN |
| Pinellia ternata (Thunb.) Makino | KCNH2 |
| Pinellia ternata (Thunb.) Makino | LTA4H |
| Pinellia ternata (Thunb.) Makino | MAOA |
| Pinellia ternata (Thunb.) Makino | MAOB |
| Pinellia ternata (Thunb.) Makino | MAP2 |
| Pinellia ternata (Thunb.) Makino | MMP9 |
| Pinellia ternata (Thunb.) Makino | MPO |
| Pinellia ternata (Thunb.) Makino | NCOA1 |
| Pinellia ternata (Thunb.) Makino | NCOA2 |
| Pinellia ternata (Thunb.) Makino | NR3C2 |
| Pinellia ternata (Thunb.) Makino | OPRD1 |
| Pinellia ternata (Thunb.) Makino | OPRM1 |
| Pinellia ternata (Thunb.) Makino | PDE10A |
| Pinellia ternata (Thunb.) Makino | PLAU |
| Pinellia ternata (Thunb.) Makino | PON1 |
| Pinellia ternata (Thunb.) Makino | PPARG |
| Pinellia ternata (Thunb.) Makino | PRKCA |
| Pinellia ternata (Thunb.) Makino | PRSS1 |
| Pinellia ternata (Thunb.) Makino | PTGS1 |
| Pinellia ternata (Thunb.) Makino | PTGS2 |
| Pinellia ternata (Thunb.) Makino | SCN5A |
| Pinellia ternata (Thunb.) Makino | SLC6A2 |
| Pinellia ternata (Thunb.) Makino | SLC6A3 |
| Pinellia ternata (Thunb.) Makino | SLC6A4 |
| Pinellia ternata (Thunb.) Makino | TP63 |
| Pinellia ternata (Thunb.) Makino | VEGFA |
| Pinellia ternata (Thunb.) Makino | XDH |
| Pinellia ternata (Thunb.) Makino | ABCB1 |
| Pinellia ternata (Thunb.) Makino | ABCC1 |
| Pinellia ternata (Thunb.) Makino | ABL1 |
| Pinellia ternata (Thunb.) Makino | ACHE |
| Pinellia ternata (Thunb.) Makino | ACP1 |
| Pinellia ternata (Thunb.) Makino | ADA |
| Pinellia ternata (Thunb.) Makino | ADORA1 |
| Pinellia ternata (Thunb.) Makino | ADORA2A |
| Pinellia ternata (Thunb.) Makino | ADORA2B |
| Pinellia ternata (Thunb.) Makino | ADORA3 |
| Pinellia ternata (Thunb.) Makino | ADRB3 |
| Pinellia ternata (Thunb.) Makino | ALDH3A1 |
| Pinellia ternata (Thunb.) Makino | ALK |
| Pinellia ternata (Thunb.) Makino | ALOX5 |
| Pinellia ternata (Thunb.) Makino | ALOX5AP |
| Pinellia ternata (Thunb.) Makino | AMY1A |
| Pinellia ternata (Thunb.) Makino | APEX1 |
| Pinellia ternata (Thunb.) Makino | APP |
| Pinellia ternata (Thunb.) Makino | ARG1 |
| Pinellia ternata (Thunb.) Makino | AURKA |
| Pinellia ternata (Thunb.) Makino | BACE1 |
| Pinellia ternata (Thunb.) Makino | BCHE |
| Pinellia ternata (Thunb.) Makino | CA1 |
| Pinellia ternata (Thunb.) Makino | CA12 |
| Pinellia ternata (Thunb.) Makino | CA2 |
| Pinellia ternata (Thunb.) Makino | CA4 |
| Pinellia ternata (Thunb.) Makino | CA6 |
| Pinellia ternata (Thunb.) Makino | CA7 |
| Pinellia ternata (Thunb.) Makino | CA9 |
| Pinellia ternata (Thunb.) Makino | CCND1 |
| Pinellia ternata (Thunb.) Makino | CCR5 |
| Pinellia ternata (Thunb.) Makino | CD38 |
| Pinellia ternata (Thunb.) Makino | CDK2 |
| Pinellia ternata (Thunb.) Makino | CDK5 |
| Pinellia ternata (Thunb.) Makino | CDK8 |
| Pinellia ternata (Thunb.) Makino | CES1 |
| Pinellia ternata (Thunb.) Makino | CFTR |
| Pinellia ternata (Thunb.) Makino | CHRNA3 |
| Pinellia ternata (Thunb.) Makino | CHRNA4 |
| Pinellia ternata (Thunb.) Makino | CHRNB2 |
| Pinellia ternata (Thunb.) Makino | CHRNB4 |
| Pinellia ternata (Thunb.) Makino | CNR1 |
| Pinellia ternata (Thunb.) Makino | CSF1R |
| Pinellia ternata (Thunb.) Makino | CTSD |
| Pinellia ternata (Thunb.) Makino | CXCR1 |
| Pinellia ternata (Thunb.) Makino | CXCR3 |
| Pinellia ternata (Thunb.) Makino | CYP11B1 |
| Pinellia ternata (Thunb.) Makino | CYP11B2 |
| Pinellia ternata (Thunb.) Makino | CYP17A1 |
| Pinellia ternata (Thunb.) Makino | CYP19A1 |
| Pinellia ternata (Thunb.) Makino | CYP1A1 |
| Pinellia ternata (Thunb.) Makino | CYP1B1 |
| Pinellia ternata (Thunb.) Makino | CYP2C19 |
| Pinellia ternata (Thunb.) Makino | DHCR7 |
| Pinellia ternata (Thunb.) Makino | DRD1 |
| Pinellia ternata (Thunb.) Makino | DRD2 |
| Pinellia ternata (Thunb.) Makino | DRD3 |
| Pinellia ternata (Thunb.) Makino | DRD4 |
| Pinellia ternata (Thunb.) Makino | DRD5 |
| Pinellia ternata (Thunb.) Makino | EGFR |
| Pinellia ternata (Thunb.) Makino | ESR2 |
| Pinellia ternata (Thunb.) Makino | ESRRA |
| Pinellia ternata (Thunb.) Makino | F2 |
| Pinellia ternata (Thunb.) Makino | F3 |
| Pinellia ternata (Thunb.) Makino | FAAH |
| Pinellia ternata (Thunb.) Makino | FABP3 |
| Pinellia ternata (Thunb.) Makino | FABP4 |
| Pinellia ternata (Thunb.) Makino | FABP5 |
| Pinellia ternata (Thunb.) Makino | FDFT1 |
| Pinellia ternata (Thunb.) Makino | FLT3 |
| Pinellia ternata (Thunb.) Makino | G6PD |
| Pinellia ternata (Thunb.) Makino | GBA |
| Pinellia ternata (Thunb.) Makino | GLO1 |
| Pinellia ternata (Thunb.) Makino | GLRA1 |
| Pinellia ternata (Thunb.) Makino | GRIA1 |
| Pinellia ternata (Thunb.) Makino | GRM1 |
| Pinellia ternata (Thunb.) Makino | GRM5 |
| Pinellia ternata (Thunb.) Makino | GSK3B |
| Pinellia ternata (Thunb.) Makino | HCRTR1 |
| Pinellia ternata (Thunb.) Makino | HCRTR2 |
| Pinellia ternata (Thunb.) Makino | HDAC2 |
| Pinellia ternata (Thunb.) Makino | HMGCR |
| Pinellia ternata (Thunb.) Makino | HRAS |
| Pinellia ternata (Thunb.) Makino | HSD11B1 |
| Pinellia ternata (Thunb.) Makino | HSD11B2 |
| Pinellia ternata (Thunb.) Makino | HSD17B1 |
| Pinellia ternata (Thunb.) Makino | HSD17B2 |
| Pinellia ternata (Thunb.) Makino | HTR1A |
| Pinellia ternata (Thunb.) Makino | HTR2A |
| Pinellia ternata (Thunb.) Makino | HTR2B |
| Pinellia ternata (Thunb.) Makino | HTR2C |
| Pinellia ternata (Thunb.) Makino | HTR7 |
| Pinellia ternata (Thunb.) Makino | IDO1 |
| Pinellia ternata (Thunb.) Makino | IGF1R |
| Pinellia ternata (Thunb.) Makino | IGFBP3 |
| Pinellia ternata (Thunb.) Makino | INSR |
| Pinellia ternata (Thunb.) Makino | ITK |
| Pinellia ternata (Thunb.) Makino | KCNN3 |
| Pinellia ternata (Thunb.) Makino | KDR |
| Pinellia ternata (Thunb.) Makino | KIT |
| Pinellia ternata (Thunb.) Makino | LCK |
| Pinellia ternata (Thunb.) Makino | LGALS3 |
| Pinellia ternata (Thunb.) Makino | LTB4R |
| Pinellia ternata (Thunb.) Makino | MAPK14 |
| Pinellia ternata (Thunb.) Makino | MAPK3 |
| Pinellia ternata (Thunb.) Makino | MAPK8 |
| Pinellia ternata (Thunb.) Makino | MAPT |
| Pinellia ternata (Thunb.) Makino | MET |
| Pinellia ternata (Thunb.) Makino | MMP1 |
| Pinellia ternata (Thunb.) Makino | MMP12 |
| Pinellia ternata (Thunb.) Makino | MMP2 |
| Pinellia ternata (Thunb.) Makino | MMP7 |
| Pinellia ternata (Thunb.) Makino | MMP8 |
| Pinellia ternata (Thunb.) Makino | MTNR1A |
| Pinellia ternata (Thunb.) Makino | MTNR1B |
| Pinellia ternata (Thunb.) Makino | MTOR |
| Pinellia ternata (Thunb.) Makino | MYLK |
| Pinellia ternata (Thunb.) Makino | NOS1 |
| Pinellia ternata (Thunb.) Makino | NOS2 |
| Pinellia ternata (Thunb.) Makino | NOX4 |
| Pinellia ternata (Thunb.) Makino | NR1H2 |
| Pinellia ternata (Thunb.) Makino | NR1H3 |
| Pinellia ternata (Thunb.) Makino | NR1H4 |
| Pinellia ternata (Thunb.) Makino | NR1I2 |
| Pinellia ternata (Thunb.) Makino | NR1I3 |
| Pinellia ternata (Thunb.) Makino | NR3C1 |
| Pinellia ternata (Thunb.) Makino | NTRK2 |
| Pinellia ternata (Thunb.) Makino | OGA |
| Pinellia ternata (Thunb.) Makino | PARP1 |
| Pinellia ternata (Thunb.) Makino | PDE4D |
| Pinellia ternata (Thunb.) Makino | PGK1 |
| Pinellia ternata (Thunb.) Makino | PIK3CA |
| Pinellia ternata (Thunb.) Makino | PIK3CG |
| Pinellia ternata (Thunb.) Makino | PLA2G2A |
| Pinellia ternata (Thunb.) Makino | PLA2G4A |
| Pinellia ternata (Thunb.) Makino | PPARA |
| Pinellia ternata (Thunb.) Makino | PREP |
| Pinellia ternata (Thunb.) Makino | PRF1 |
| Pinellia ternata (Thunb.) Makino | PRKCE |
| Pinellia ternata (Thunb.) Makino | PTGER2 |
| Pinellia ternata (Thunb.) Makino | PTPN11 |
| Pinellia ternata (Thunb.) Makino | PTPN2 |
| Pinellia ternata (Thunb.) Makino | PTPRF |
| Pinellia ternata (Thunb.) Makino | RORA |
| Pinellia ternata (Thunb.) Makino | RPS6KB1 |
| Pinellia ternata (Thunb.) Makino | SERPINA6 |
| Pinellia ternata (Thunb.) Makino | SHBG |
| Pinellia ternata (Thunb.) Makino | SIGMAR1 |
| Pinellia ternata (Thunb.) Makino | SIRT1 |
| Pinellia ternata (Thunb.) Makino | SLC18A2 |
| Pinellia ternata (Thunb.) Makino | SLC1A3 |
| Pinellia ternata (Thunb.) Makino | SLC22A6 |
| Pinellia ternata (Thunb.) Makino | SRC |
| Pinellia ternata (Thunb.) Makino | SRD5A1 |
| Pinellia ternata (Thunb.) Makino | SRD5A2 |
| Pinellia ternata (Thunb.) Makino | SYK |
| Pinellia ternata (Thunb.) Makino | TACR2 |
| Pinellia ternata (Thunb.) Makino | TBXA2R |
| Pinellia ternata (Thunb.) Makino | TERT |
| Pinellia ternata (Thunb.) Makino | TGFB1 |
| Pinellia ternata (Thunb.) Makino | TGFBR1 |
| Pinellia ternata (Thunb.) Makino | TNKS |
| Pinellia ternata (Thunb.) Makino | TOP1 |
| Pinellia ternata (Thunb.) Makino | TRPA1 |
| Pinellia ternata (Thunb.) Makino | TRPV1 |
| Pinellia ternata (Thunb.) Makino | TTR |
| Pinellia ternata (Thunb.) Makino | TYMP |
| Pinellia ternata (Thunb.) Makino | TYR |
| Pinellia ternata (Thunb.) Makino | UGT2B7 |
| Pinellia ternata (Thunb.) Makino | VDR |
| Pinellia ternata (Thunb.) Makino | XBP1 |
| Glycyrrhiza uralensis Fisch. ex DC. | ABAT |
| Glycyrrhiza uralensis Fisch. ex DC. | ABCB1 |
| Glycyrrhiza uralensis Fisch. ex DC. | ABCC1 |
| Glycyrrhiza uralensis Fisch. ex DC. | ACHE |
| Glycyrrhiza uralensis Fisch. ex DC. | ADIPOQ |
| Glycyrrhiza uralensis Fisch. ex DC. | ADRA1A |
| Glycyrrhiza uralensis Fisch. ex DC. | ADRA1B |
| Glycyrrhiza uralensis Fisch. ex DC. | ADRA1D |
| Glycyrrhiza uralensis Fisch. ex DC. | ADRB1 |
| Glycyrrhiza uralensis Fisch. ex DC. | ADRB2 |
| Glycyrrhiza uralensis Fisch. ex DC. | AHR |
| Glycyrrhiza uralensis Fisch. ex DC. | AHSA1 |
| Glycyrrhiza uralensis Fisch. ex DC. | AKR1B1 |
| Glycyrrhiza uralensis Fisch. ex DC. | AKR1C1 |
| Glycyrrhiza uralensis Fisch. ex DC. | AKR1C3 |
| Glycyrrhiza uralensis Fisch. ex DC. | AKT1 |
| Glycyrrhiza uralensis Fisch. ex DC. | ALOX5 |
| Glycyrrhiza uralensis Fisch. ex DC. | APOB |
| Glycyrrhiza uralensis Fisch. ex DC. | AR |
| Glycyrrhiza uralensis Fisch. ex DC. | BAX |
| Glycyrrhiza uralensis Fisch. ex DC. | BCL2 |
| Glycyrrhiza uralensis Fisch. ex DC. | CA12 |
| Glycyrrhiza uralensis Fisch. ex DC. | CA2 |
| Glycyrrhiza uralensis Fisch. ex DC. | CA4 |
| Glycyrrhiza uralensis Fisch. ex DC. | CA7 |
| Glycyrrhiza uralensis Fisch. ex DC. | CASP3 |
| Glycyrrhiza uralensis Fisch. ex DC. | CASP8 |
| Glycyrrhiza uralensis Fisch. ex DC. | CASP9 |
| Glycyrrhiza uralensis Fisch. ex DC. | CAT |
| Glycyrrhiza uralensis Fisch. ex DC. | CAV1 |
| Glycyrrhiza uralensis Fisch. ex DC. | CCL2 |
| Glycyrrhiza uralensis Fisch. ex DC. | CCNA2 |
| Glycyrrhiza uralensis Fisch. ex DC. | CCND1 |
| Glycyrrhiza uralensis Fisch. ex DC. | CD40LG |
| Glycyrrhiza uralensis Fisch. ex DC. | CES1 |
| Glycyrrhiza uralensis Fisch. ex DC. | CHEK2 |
| Glycyrrhiza uralensis Fisch. ex DC. | CHRM1 |
| Glycyrrhiza uralensis Fisch. ex DC. | CHRM2 |
| Glycyrrhiza uralensis Fisch. ex DC. | CHRM3 |
| Glycyrrhiza uralensis Fisch. ex DC. | CHRM5 |
| Glycyrrhiza uralensis Fisch. ex DC. | CLDN4 |
| Glycyrrhiza uralensis Fisch. ex DC. | COL1A1 |
| Glycyrrhiza uralensis Fisch. ex DC. | COL3A1 |
| Glycyrrhiza uralensis Fisch. ex DC. | CRP |
| Glycyrrhiza uralensis Fisch. ex DC. | CTSD |
| Glycyrrhiza uralensis Fisch. ex DC. | CXCL10 |
| Glycyrrhiza uralensis Fisch. ex DC. | CXCL8 |
| Glycyrrhiza uralensis Fisch. ex DC. | CYP19A1 |
| Glycyrrhiza uralensis Fisch. ex DC. | CYP1A1 |
| Glycyrrhiza uralensis Fisch. ex DC. | CYP1A2 |
| Glycyrrhiza uralensis Fisch. ex DC. | CYP1B1 |
| Glycyrrhiza uralensis Fisch. ex DC. | CYP3A4 |
| Glycyrrhiza uralensis Fisch. ex DC. | DUOX2 |
| Glycyrrhiza uralensis Fisch. ex DC. | E2F1 |
| Glycyrrhiza uralensis Fisch. ex DC. | E2F2 |
| Glycyrrhiza uralensis Fisch. ex DC. | EGF |
| Glycyrrhiza uralensis Fisch. ex DC. | EGFR |
| Glycyrrhiza uralensis Fisch. ex DC. | ERBB2 |
| Glycyrrhiza uralensis Fisch. ex DC. | ESR1 |
| Glycyrrhiza uralensis Fisch. ex DC. | ESR2 |
| Glycyrrhiza uralensis Fisch. ex DC. | ESRRA |
| Glycyrrhiza uralensis Fisch. ex DC. | F3 |
| Glycyrrhiza uralensis Fisch. ex DC. | F7 |
| Glycyrrhiza uralensis Fisch. ex DC. | FLT3 |
| Glycyrrhiza uralensis Fisch. ex DC. | FOS |
| Glycyrrhiza uralensis Fisch. ex DC. | GABRA1 |
| Glycyrrhiza uralensis Fisch. ex DC. | GRIA2 |
| Glycyrrhiza uralensis Fisch. ex DC. | GSK3B |
| Glycyrrhiza uralensis Fisch. ex DC. | GSR |
| Glycyrrhiza uralensis Fisch. ex DC. | GSTM1 |
| Glycyrrhiza uralensis Fisch. ex DC. | GSTP1 |
| Glycyrrhiza uralensis Fisch. ex DC. | HIF1A |
| Glycyrrhiza uralensis Fisch. ex DC. | HK2 |
| Glycyrrhiza uralensis Fisch. ex DC. | HMGCR |
| Glycyrrhiza uralensis Fisch. ex DC. | HMOX1 |
| Glycyrrhiza uralensis Fisch. ex DC. | HSD17B1 |
| Glycyrrhiza uralensis Fisch. ex DC. | HSD17B2 |
| Glycyrrhiza uralensis Fisch. ex DC. | HSF1 |
| Glycyrrhiza uralensis Fisch. ex DC. | HSPB1 |
| Glycyrrhiza uralensis Fisch. ex DC. | HTR3A |
| Glycyrrhiza uralensis Fisch. ex DC. | ICAM1 |
| Glycyrrhiza uralensis Fisch. ex DC. | IFNG |
| Glycyrrhiza uralensis Fisch. ex DC. | IGF2 |
| Glycyrrhiza uralensis Fisch. ex DC. | IGFBP3 |
| Glycyrrhiza uralensis Fisch. ex DC. | IL10 |
| Glycyrrhiza uralensis Fisch. ex DC. | IL1A |
| Glycyrrhiza uralensis Fisch. ex DC. | IL1B |
| Glycyrrhiza uralensis Fisch. ex DC. | IL2 |
| Glycyrrhiza uralensis Fisch. ex DC. | IL4 |
| Glycyrrhiza uralensis Fisch. ex DC. | IL6 |
| Glycyrrhiza uralensis Fisch. ex DC. | INSR |
| Glycyrrhiza uralensis Fisch. ex DC. | IRF1 |
| Glycyrrhiza uralensis Fisch. ex DC. | JUN |
| Glycyrrhiza uralensis Fisch. ex DC. | KCNH2 |
| Glycyrrhiza uralensis Fisch. ex DC. | KDR |
| Glycyrrhiza uralensis Fisch. ex DC. | LDLR |
| Glycyrrhiza uralensis Fisch. ex DC. | LTA4H |
| Glycyrrhiza uralensis Fisch. ex DC. | MAOB |
| Glycyrrhiza uralensis Fisch. ex DC. | MAPK1 |
| Glycyrrhiza uralensis Fisch. ex DC. | MAPK10 |
| Glycyrrhiza uralensis Fisch. ex DC. | MAPK14 |
| Glycyrrhiza uralensis Fisch. ex DC. | MAPK3 |
| Glycyrrhiza uralensis Fisch. ex DC. | MAPK8 |
| Glycyrrhiza uralensis Fisch. ex DC. | MMP1 |
| Glycyrrhiza uralensis Fisch. ex DC. | MMP2 |
| Glycyrrhiza uralensis Fisch. ex DC. | MMP9 |
| Glycyrrhiza uralensis Fisch. ex DC. | MPO |
| Glycyrrhiza uralensis Fisch. ex DC. | MYC |
| Glycyrrhiza uralensis Fisch. ex DC. | NCF1 |
| Glycyrrhiza uralensis Fisch. ex DC. | NCOA1 |
| Glycyrrhiza uralensis Fisch. ex DC. | NCOA2 |
| Glycyrrhiza uralensis Fisch. ex DC. | NOS2 |
| Glycyrrhiza uralensis Fisch. ex DC. | NOS3 |
| Glycyrrhiza uralensis Fisch. ex DC. | NOX4 |
| Glycyrrhiza uralensis Fisch. ex DC. | NPEPPS |
| Glycyrrhiza uralensis Fisch. ex DC. | NQO1 |
| Glycyrrhiza uralensis Fisch. ex DC. | NR1I2 |
| Glycyrrhiza uralensis Fisch. ex DC. | NR1I3 |
| Glycyrrhiza uralensis Fisch. ex DC. | NR3C2 |
| Glycyrrhiza uralensis Fisch. ex DC. | ODC1 |
| Glycyrrhiza uralensis Fisch. ex DC. | OPRD1 |
| Glycyrrhiza uralensis Fisch. ex DC. | OPRM1 |
| Glycyrrhiza uralensis Fisch. ex DC. | PARP1 |
| Glycyrrhiza uralensis Fisch. ex DC. | PLAT |
| Glycyrrhiza uralensis Fisch. ex DC. | PLAU |
| Glycyrrhiza uralensis Fisch. ex DC. | PLB1 |
| Glycyrrhiza uralensis Fisch. ex DC. | PON1 |
| Glycyrrhiza uralensis Fisch. ex DC. | PPARA |
| Glycyrrhiza uralensis Fisch. ex DC. | PPARG |
| Glycyrrhiza uralensis Fisch. ex DC. | PPP3CA |
| Glycyrrhiza uralensis Fisch. ex DC. | PRKCA |
| Glycyrrhiza uralensis Fisch. ex DC. | PRSS1 |
| Glycyrrhiza uralensis Fisch. ex DC. | PTGER3 |
| Glycyrrhiza uralensis Fisch. ex DC. | PTGS1 |
| Glycyrrhiza uralensis Fisch. ex DC. | PTGS2 |
| Glycyrrhiza uralensis Fisch. ex DC. | RAF1 |
| Glycyrrhiza uralensis Fisch. ex DC. | RASSF1 |
| Glycyrrhiza uralensis Fisch. ex DC. | RB1 |
| Glycyrrhiza uralensis Fisch. ex DC. | RUNX1T1 |
| Glycyrrhiza uralensis Fisch. ex DC. | RUNX2 |
| Glycyrrhiza uralensis Fisch. ex DC. | SCN5A |
| Glycyrrhiza uralensis Fisch. ex DC. | SELE |
| Glycyrrhiza uralensis Fisch. ex DC. | SERPINE1 |
| Glycyrrhiza uralensis Fisch. ex DC. | SHBG |
| Glycyrrhiza uralensis Fisch. ex DC. | SLC2A4 |
| Glycyrrhiza uralensis Fisch. ex DC. | SLC6A2 |
| Glycyrrhiza uralensis Fisch. ex DC. | SLC6A3 |
| Glycyrrhiza uralensis Fisch. ex DC. | SLC6A4 |
| Glycyrrhiza uralensis Fisch. ex DC. | SLPI |
| Glycyrrhiza uralensis Fisch. ex DC. | SOD1 |
| Glycyrrhiza uralensis Fisch. ex DC. | SPP1 |
| Glycyrrhiza uralensis Fisch. ex DC. | SREBF1 |
| Glycyrrhiza uralensis Fisch. ex DC. | STAT1 |
| Glycyrrhiza uralensis Fisch. ex DC. | STAT3 |
| Glycyrrhiza uralensis Fisch. ex DC. | THBD |
| Glycyrrhiza uralensis Fisch. ex DC. | TOP1 |
| Glycyrrhiza uralensis Fisch. ex DC. | TP63 |
| Glycyrrhiza uralensis Fisch. ex DC. | TYR |
| Glycyrrhiza uralensis Fisch. ex DC. | UGT1A1 |
| Glycyrrhiza uralensis Fisch. ex DC. | VCAM1 |
| Glycyrrhiza uralensis Fisch. ex DC. | VEGFA |
| Glycyrrhiza uralensis Fisch. ex DC. | XDH |
| Glycyrrhiza uralensis Fisch. ex DC. | ABL1 |
| Glycyrrhiza uralensis Fisch. ex DC. | ACP1 |
| Glycyrrhiza uralensis Fisch. ex DC. | ADAM10 |
| Glycyrrhiza uralensis Fisch. ex DC. | ADAM17 |
| Glycyrrhiza uralensis Fisch. ex DC. | ADAM33 |
| Glycyrrhiza uralensis Fisch. ex DC. | ADCY5 |
| Glycyrrhiza uralensis Fisch. ex DC. | ADORA1 |
| Glycyrrhiza uralensis Fisch. ex DC. | ADORA2A |
| Glycyrrhiza uralensis Fisch. ex DC. | ADORA2B |
| Glycyrrhiza uralensis Fisch. ex DC. | ADORA3 |
| Glycyrrhiza uralensis Fisch. ex DC. | ADRA2A |
| Glycyrrhiza uralensis Fisch. ex DC. | ADRA2B |
| Glycyrrhiza uralensis Fisch. ex DC. | ADRA2C |
| Glycyrrhiza uralensis Fisch. ex DC. | AGPAT2 |
| Glycyrrhiza uralensis Fisch. ex DC. | AGTR1 |
| Glycyrrhiza uralensis Fisch. ex DC. | AKR1A1 |
| Glycyrrhiza uralensis Fisch. ex DC. | AKR1C4 |
| Glycyrrhiza uralensis Fisch. ex DC. | AKT2 |
| Glycyrrhiza uralensis Fisch. ex DC. | ALDH2 |
| Glycyrrhiza uralensis Fisch. ex DC. | ALK |
| Glycyrrhiza uralensis Fisch. ex DC. | ALOX15 |
| Glycyrrhiza uralensis Fisch. ex DC. | ALOX5AP |
| Glycyrrhiza uralensis Fisch. ex DC. | ALPL |
| Glycyrrhiza uralensis Fisch. ex DC. | AMY1A |
| Glycyrrhiza uralensis Fisch. ex DC. | ANPEP |
| Glycyrrhiza uralensis Fisch. ex DC. | APEX1 |
| Glycyrrhiza uralensis Fisch. ex DC. | APP |
| Glycyrrhiza uralensis Fisch. ex DC. | ARG1 |
| Glycyrrhiza uralensis Fisch. ex DC. | ASAH1 |
| Glycyrrhiza uralensis Fisch. ex DC. | AURKA |
| Glycyrrhiza uralensis Fisch. ex DC. | AVPR1A |
| Glycyrrhiza uralensis Fisch. ex DC. | AVPR2 |
| Glycyrrhiza uralensis Fisch. ex DC. | BACE1 |
| Glycyrrhiza uralensis Fisch. ex DC. | BACE2 |
| Glycyrrhiza uralensis Fisch. ex DC. | BAZ2B |
| Glycyrrhiza uralensis Fisch. ex DC. | BCHE |
| Glycyrrhiza uralensis Fisch. ex DC. | BLK |
| Glycyrrhiza uralensis Fisch. ex DC. | BMP4 |
| Glycyrrhiza uralensis Fisch. ex DC. | BMX |
| Glycyrrhiza uralensis Fisch. ex DC. | BRAF |
| Glycyrrhiza uralensis Fisch. ex DC. | BTK |
| Glycyrrhiza uralensis Fisch. ex DC. | CA1 |
| Glycyrrhiza uralensis Fisch. ex DC. | CA13 |
| Glycyrrhiza uralensis Fisch. ex DC. | CA14 |
| Glycyrrhiza uralensis Fisch. ex DC. | CA3 |
| Glycyrrhiza uralensis Fisch. ex DC. | CA5A |
| Glycyrrhiza uralensis Fisch. ex DC. | CA5B |
| Glycyrrhiza uralensis Fisch. ex DC. | CA6 |
| Glycyrrhiza uralensis Fisch. ex DC. | CA9 |
| Glycyrrhiza uralensis Fisch. ex DC. | CALCA |
| Glycyrrhiza uralensis Fisch. ex DC. | CALCRL |
| Glycyrrhiza uralensis Fisch. ex DC. | CAMK2B |
| Glycyrrhiza uralensis Fisch. ex DC. | CAPN1 |
| Glycyrrhiza uralensis Fisch. ex DC. | CASK |
| Glycyrrhiza uralensis Fisch. ex DC. | CASR |
| Glycyrrhiza uralensis Fisch. ex DC. | CCKBR |
| Glycyrrhiza uralensis Fisch. ex DC. | CCR3 |
| Glycyrrhiza uralensis Fisch. ex DC. | CCR4 |
| Glycyrrhiza uralensis Fisch. ex DC. | CD38 |
| Glycyrrhiza uralensis Fisch. ex DC. | CDK2 |
| Glycyrrhiza uralensis Fisch. ex DC. | CDK5 |
| Glycyrrhiza uralensis Fisch. ex DC. | CDK8 |
| Glycyrrhiza uralensis Fisch. ex DC. | CFTR |
| Glycyrrhiza uralensis Fisch. ex DC. | CHRNA3 |
| Glycyrrhiza uralensis Fisch. ex DC. | CHRNA4 |
| Glycyrrhiza uralensis Fisch. ex DC. | CHRNA7 |
| Glycyrrhiza uralensis Fisch. ex DC. | CHRNB2 |
| Glycyrrhiza uralensis Fisch. ex DC. | CHRNB4 |
| Glycyrrhiza uralensis Fisch. ex DC. | CMA1 |
| Glycyrrhiza uralensis Fisch. ex DC. | CNR1 |
| Glycyrrhiza uralensis Fisch. ex DC. | CNR2 |
| Glycyrrhiza uralensis Fisch. ex DC. | COMT |
| Glycyrrhiza uralensis Fisch. ex DC. | CRHR1 |
| Glycyrrhiza uralensis Fisch. ex DC. | CSF1R |
| Glycyrrhiza uralensis Fisch. ex DC. | CSK |
| Glycyrrhiza uralensis Fisch. ex DC. | CSNK1A1 |
| Glycyrrhiza uralensis Fisch. ex DC. | CTSG |
| Glycyrrhiza uralensis Fisch. ex DC. | CXCR1 |
| Glycyrrhiza uralensis Fisch. ex DC. | CXCR2 |
| Glycyrrhiza uralensis Fisch. ex DC. | CXCR4 |
| Glycyrrhiza uralensis Fisch. ex DC. | CYP11B1 |
| Glycyrrhiza uralensis Fisch. ex DC. | CYP11B2 |
| Glycyrrhiza uralensis Fisch. ex DC. | CYP17A1 |
| Glycyrrhiza uralensis Fisch. ex DC. | CYP2C19 |
| Glycyrrhiza uralensis Fisch. ex DC. | CYP2C9 |
| Glycyrrhiza uralensis Fisch. ex DC. | DHCR7 |
| Glycyrrhiza uralensis Fisch. ex DC. | DHFR |
| Glycyrrhiza uralensis Fisch. ex DC. | DHODH |
| Glycyrrhiza uralensis Fisch. ex DC. | DMPK |
| Glycyrrhiza uralensis Fisch. ex DC. | DPP4 |
| Glycyrrhiza uralensis Fisch. ex DC. | DRD1 |
| Glycyrrhiza uralensis Fisch. ex DC. | DRD2 |
| Glycyrrhiza uralensis Fisch. ex DC. | DRD3 |
| Glycyrrhiza uralensis Fisch. ex DC. | DRD4 |
| Glycyrrhiza uralensis Fisch. ex DC. | DRD5 |
| Glycyrrhiza uralensis Fisch. ex DC. | DYRK1A |
| Glycyrrhiza uralensis Fisch. ex DC. | DYRK1B |
| Glycyrrhiza uralensis Fisch. ex DC. | DYRK2 |
| Glycyrrhiza uralensis Fisch. ex DC. | DYRK3 |
| Glycyrrhiza uralensis Fisch. ex DC. | ECE1 |
| Glycyrrhiza uralensis Fisch. ex DC. | EDNRA |
| Glycyrrhiza uralensis Fisch. ex DC. | EDNRB |
| Glycyrrhiza uralensis Fisch. ex DC. | EGLN1 |
| Glycyrrhiza uralensis Fisch. ex DC. | EIF2AK2 |
| Glycyrrhiza uralensis Fisch. ex DC. | ELANE |
| Glycyrrhiza uralensis Fisch. ex DC. | ENPP1 |
| Glycyrrhiza uralensis Fisch. ex DC. | EP300 |
| Glycyrrhiza uralensis Fisch. ex DC. | EPHA4 |
| Glycyrrhiza uralensis Fisch. ex DC. | EPHA6 |
| Glycyrrhiza uralensis Fisch. ex DC. | EPHB1 |
| Glycyrrhiza uralensis Fisch. ex DC. | EPHB2 |
| Glycyrrhiza uralensis Fisch. ex DC. | EPHX1 |
| Glycyrrhiza uralensis Fisch. ex DC. | EPHX2 |
| Glycyrrhiza uralensis Fisch. ex DC. | ESRRG |
| Glycyrrhiza uralensis Fisch. ex DC. | F10 |
| Glycyrrhiza uralensis Fisch. ex DC. | F2 |
| Glycyrrhiza uralensis Fisch. ex DC. | FAAH |
| Glycyrrhiza uralensis Fisch. ex DC. | FABP3 |
| Glycyrrhiza uralensis Fisch. ex DC. | FABP4 |
| Glycyrrhiza uralensis Fisch. ex DC. | FABP5 |
| Glycyrrhiza uralensis Fisch. ex DC. | FCER2 |
| Glycyrrhiza uralensis Fisch. ex DC. | FDFT1 |
| Glycyrrhiza uralensis Fisch. ex DC. | FGFR1 |
| Glycyrrhiza uralensis Fisch. ex DC. | FGFR2 |
| Glycyrrhiza uralensis Fisch. ex DC. | FGFR3 |
| Glycyrrhiza uralensis Fisch. ex DC. | FGR |
| Glycyrrhiza uralensis Fisch. ex DC. | FKBP1A |
| Glycyrrhiza uralensis Fisch. ex DC. | FOLH1 |
| Glycyrrhiza uralensis Fisch. ex DC. | G6PD |
| Glycyrrhiza uralensis Fisch. ex DC. | GABRA2 |
| Glycyrrhiza uralensis Fisch. ex DC. | GABRA3 |
| Glycyrrhiza uralensis Fisch. ex DC. | GABRA5 |
| Glycyrrhiza uralensis Fisch. ex DC. | GABRA6 |
| Glycyrrhiza uralensis Fisch. ex DC. | GABRB2 |
| Glycyrrhiza uralensis Fisch. ex DC. | GABRB3 |
| Glycyrrhiza uralensis Fisch. ex DC. | GABRG2 |
| Glycyrrhiza uralensis Fisch. ex DC. | GCGR |
| Glycyrrhiza uralensis Fisch. ex DC. | GCK |
| Glycyrrhiza uralensis Fisch. ex DC. | GLO1 |
| Glycyrrhiza uralensis Fisch. ex DC. | GLRA1 |
| Glycyrrhiza uralensis Fisch. ex DC. | GNRHR |
| Glycyrrhiza uralensis Fisch. ex DC. | GRIA1 |
| Glycyrrhiza uralensis Fisch. ex DC. | GRIN1 |
| Glycyrrhiza uralensis Fisch. ex DC. | GRIN2A |
| Glycyrrhiza uralensis Fisch. ex DC. | GRK2 |
| Glycyrrhiza uralensis Fisch. ex DC. | GRK6 |
| Glycyrrhiza uralensis Fisch. ex DC. | GRM1 |
| Glycyrrhiza uralensis Fisch. ex DC. | GRM4 |
| Glycyrrhiza uralensis Fisch. ex DC. | GRM5 |
| Glycyrrhiza uralensis Fisch. ex DC. | GUSB |
| Glycyrrhiza uralensis Fisch. ex DC. | HCRTR1 |
| Glycyrrhiza uralensis Fisch. ex DC. | HCRTR2 |
| Glycyrrhiza uralensis Fisch. ex DC. | HDAC1 |
| Glycyrrhiza uralensis Fisch. ex DC. | HDAC2 |
| Glycyrrhiza uralensis Fisch. ex DC. | HDAC4 |
| Glycyrrhiza uralensis Fisch. ex DC. | HDAC8 |
| Glycyrrhiza uralensis Fisch. ex DC. | HDAC9 |
| Glycyrrhiza uralensis Fisch. ex DC. | HK1 |
| Glycyrrhiza uralensis Fisch. ex DC. | HSD11B1 |
| Glycyrrhiza uralensis Fisch. ex DC. | HSD11B2 |
| Glycyrrhiza uralensis Fisch. ex DC. | HSP90AA1 |
| Glycyrrhiza uralensis Fisch. ex DC. | HSP90B1 |
| Glycyrrhiza uralensis Fisch. ex DC. | HTR1A |
| Glycyrrhiza uralensis Fisch. ex DC. | HTR1B |
| Glycyrrhiza uralensis Fisch. ex DC. | HTR2A |
| Glycyrrhiza uralensis Fisch. ex DC. | HTR2C |
| Glycyrrhiza uralensis Fisch. ex DC. | HTR6 |
| Glycyrrhiza uralensis Fisch. ex DC. | HTR7 |
| Glycyrrhiza uralensis Fisch. ex DC. | HTT |
| Glycyrrhiza uralensis Fisch. ex DC. | IDH1 |
| Glycyrrhiza uralensis Fisch. ex DC. | IDO1 |
| Glycyrrhiza uralensis Fisch. ex DC. | IGF1R |
| Glycyrrhiza uralensis Fisch. ex DC. | IGFBP1 |
| Glycyrrhiza uralensis Fisch. ex DC. | IGFBP2 |
| Glycyrrhiza uralensis Fisch. ex DC. | IGFBP4 |
| Glycyrrhiza uralensis Fisch. ex DC. | IGFBP5 |
| Glycyrrhiza uralensis Fisch. ex DC. | IGFBP6 |
| Glycyrrhiza uralensis Fisch. ex DC. | IKBKE |
| Glycyrrhiza uralensis Fisch. ex DC. | IMPDH1 |
| Glycyrrhiza uralensis Fisch. ex DC. | ITGA4 |
| Glycyrrhiza uralensis Fisch. ex DC. | ITGAL |
| Glycyrrhiza uralensis Fisch. ex DC. | ITGAV |
| Glycyrrhiza uralensis Fisch. ex DC. | ITGB2 |
| Glycyrrhiza uralensis Fisch. ex DC. | ITGB3 |
| Glycyrrhiza uralensis Fisch. ex DC. | ITK |
| Glycyrrhiza uralensis Fisch. ex DC. | JAK1 |
| Glycyrrhiza uralensis Fisch. ex DC. | JAK2 |
| Glycyrrhiza uralensis Fisch. ex DC. | KAT2B |
| Glycyrrhiza uralensis Fisch. ex DC. | KCNA3 |
| Glycyrrhiza uralensis Fisch. ex DC. | KCNA5 |
| Glycyrrhiza uralensis Fisch. ex DC. | KCNK9 |
| Glycyrrhiza uralensis Fisch. ex DC. | KDM1A |
| Glycyrrhiza uralensis Fisch. ex DC. | KDM4A |
| Glycyrrhiza uralensis Fisch. ex DC. | KDM4C |
| Glycyrrhiza uralensis Fisch. ex DC. | KDM4D |
| Glycyrrhiza uralensis Fisch. ex DC. | KDM5C |
| Glycyrrhiza uralensis Fisch. ex DC. | KISS1R |
| Glycyrrhiza uralensis Fisch. ex DC. | KIT |
| Glycyrrhiza uralensis Fisch. ex DC. | LCK |
| Glycyrrhiza uralensis Fisch. ex DC. | LDHA |
| Glycyrrhiza uralensis Fisch. ex DC. | LIMK1 |
| Glycyrrhiza uralensis Fisch. ex DC. | LIMK2 |
| Glycyrrhiza uralensis Fisch. ex DC. | LNPEP |
| Glycyrrhiza uralensis Fisch. ex DC. | LPA |
| Glycyrrhiza uralensis Fisch. ex DC. | LRRK2 |
| Glycyrrhiza uralensis Fisch. ex DC. | LTB4R |
| Glycyrrhiza uralensis Fisch. ex DC. | LYN |
| Glycyrrhiza uralensis Fisch. ex DC. | MAOA |
| Glycyrrhiza uralensis Fisch. ex DC. | MAP2K1 |
| Glycyrrhiza uralensis Fisch. ex DC. | MAP2K2 |
| Glycyrrhiza uralensis Fisch. ex DC. | MAPKAPK5 |
| Glycyrrhiza uralensis Fisch. ex DC. | MAPT |
| Glycyrrhiza uralensis Fisch. ex DC. | MBNL1 |
| Glycyrrhiza uralensis Fisch. ex DC. | MDM2 |
| Glycyrrhiza uralensis Fisch. ex DC. | MERTK |
| Glycyrrhiza uralensis Fisch. ex DC. | MET |
| Glycyrrhiza uralensis Fisch. ex DC. | MGLL |
| Glycyrrhiza uralensis Fisch. ex DC. | MGMT |
| Glycyrrhiza uralensis Fisch. ex DC. | MIF |
| Glycyrrhiza uralensis Fisch. ex DC. | MME |
| Glycyrrhiza uralensis Fisch. ex DC. | MMP12 |
| Glycyrrhiza uralensis Fisch. ex DC. | MMP13 |
| Glycyrrhiza uralensis Fisch. ex DC. | MMP7 |
| Glycyrrhiza uralensis Fisch. ex DC. | MMP8 |
| Glycyrrhiza uralensis Fisch. ex DC. | MPI |
| Glycyrrhiza uralensis Fisch. ex DC. | MTNR1A |
| Glycyrrhiza uralensis Fisch. ex DC. | MTNR1B |
| Glycyrrhiza uralensis Fisch. ex DC. | MTOR |
| Glycyrrhiza uralensis Fisch. ex DC. | MYLK |
| Glycyrrhiza uralensis Fisch. ex DC. | NCOR1 |
| Glycyrrhiza uralensis Fisch. ex DC. | NCSTN |
| Glycyrrhiza uralensis Fisch. ex DC. | NEK1 |
| Glycyrrhiza uralensis Fisch. ex DC. | NFKB1 |
| Glycyrrhiza uralensis Fisch. ex DC. | NPY5R |
| Glycyrrhiza uralensis Fisch. ex DC. | NR1D1 |
| Glycyrrhiza uralensis Fisch. ex DC. | NR1H2 |
| Glycyrrhiza uralensis Fisch. ex DC. | NR1H3 |
| Glycyrrhiza uralensis Fisch. ex DC. | NR1H4 |
| Glycyrrhiza uralensis Fisch. ex DC. | NR3C1 |
| Glycyrrhiza uralensis Fisch. ex DC. | NTRK1 |
| Glycyrrhiza uralensis Fisch. ex DC. | OAT |
| Glycyrrhiza uralensis Fisch. ex DC. | OPRK1 |
| Glycyrrhiza uralensis Fisch. ex DC. | OXTR |
| Glycyrrhiza uralensis Fisch. ex DC. | P2RX3 |
| Glycyrrhiza uralensis Fisch. ex DC. | P2RX7 |
| Glycyrrhiza uralensis Fisch. ex DC. | PDE10A |
| Glycyrrhiza uralensis Fisch. ex DC. | PDE2A |
| Glycyrrhiza uralensis Fisch. ex DC. | PDE4A |
| Glycyrrhiza uralensis Fisch. ex DC. | PDE4B |
| Glycyrrhiza uralensis Fisch. ex DC. | PDE4D |
| Glycyrrhiza uralensis Fisch. ex DC. | PDE5A |
| Glycyrrhiza uralensis Fisch. ex DC. | PDGFRA |
| Glycyrrhiza uralensis Fisch. ex DC. | PDGFRB |
| Glycyrrhiza uralensis Fisch. ex DC. | PDPK1 |
| Glycyrrhiza uralensis Fisch. ex DC. | PGF |
| Glycyrrhiza uralensis Fisch. ex DC. | PGK1 |
| Glycyrrhiza uralensis Fisch. ex DC. | PHKG2 |
| Glycyrrhiza uralensis Fisch. ex DC. | PIK3CA |
| Glycyrrhiza uralensis Fisch. ex DC. | PIK3CG |
| Glycyrrhiza uralensis Fisch. ex DC. | PIK3R1 |
| Glycyrrhiza uralensis Fisch. ex DC. | PIP5K1C |
| Glycyrrhiza uralensis Fisch. ex DC. | PITRM1 |
| Glycyrrhiza uralensis Fisch. ex DC. | PLA2G2A |
| Glycyrrhiza uralensis Fisch. ex DC. | PLA2G7 |
| Glycyrrhiza uralensis Fisch. ex DC. | PLAA |
| Glycyrrhiza uralensis Fisch. ex DC. | PLG |
| Glycyrrhiza uralensis Fisch. ex DC. | PNMT |
| Glycyrrhiza uralensis Fisch. ex DC. | PREP |
| Glycyrrhiza uralensis Fisch. ex DC. | PRF1 |
| Glycyrrhiza uralensis Fisch. ex DC. | PRKACA |
| Glycyrrhiza uralensis Fisch. ex DC. | PRKCD |
| Glycyrrhiza uralensis Fisch. ex DC. | PRKCE |
| Glycyrrhiza uralensis Fisch. ex DC. | PRKCG |
| Glycyrrhiza uralensis Fisch. ex DC. | PSEN1 |
| Glycyrrhiza uralensis Fisch. ex DC. | PSEN2 |
| Glycyrrhiza uralensis Fisch. ex DC. | PSENEN |
| Glycyrrhiza uralensis Fisch. ex DC. | PTAFR |
| Glycyrrhiza uralensis Fisch. ex DC. | PTGDR |
| Glycyrrhiza uralensis Fisch. ex DC. | PTGDR2 |
| Glycyrrhiza uralensis Fisch. ex DC. | PTGER2 |
| Glycyrrhiza uralensis Fisch. ex DC. | PTPN11 |
| Glycyrrhiza uralensis Fisch. ex DC. | PTPN2 |
| Glycyrrhiza uralensis Fisch. ex DC. | PTPRF |
| Glycyrrhiza uralensis Fisch. ex DC. | RARA |
| Glycyrrhiza uralensis Fisch. ex DC. | RASGRP3 |
| Glycyrrhiza uralensis Fisch. ex DC. | RET |
| Glycyrrhiza uralensis Fisch. ex DC. | RORA |
| Glycyrrhiza uralensis Fisch. ex DC. | RPS6KA1 |
| Glycyrrhiza uralensis Fisch. ex DC. | RPS6KB1 |
| Glycyrrhiza uralensis Fisch. ex DC. | SCARB1 |
| Glycyrrhiza uralensis Fisch. ex DC. | SCN2A |
| Glycyrrhiza uralensis Fisch. ex DC. | SCN9A |
| Glycyrrhiza uralensis Fisch. ex DC. | SERPINA6 |
| Glycyrrhiza uralensis Fisch. ex DC. | SGK1 |
| Glycyrrhiza uralensis Fisch. ex DC. | SHH |
| Glycyrrhiza uralensis Fisch. ex DC. | SIGMAR1 |
| Glycyrrhiza uralensis Fisch. ex DC. | SIRT1 |
| Glycyrrhiza uralensis Fisch. ex DC. | SLC1A3 |
| Glycyrrhiza uralensis Fisch. ex DC. | SLC22A6 |
| Glycyrrhiza uralensis Fisch. ex DC. | SLC2A1 |
| Glycyrrhiza uralensis Fisch. ex DC. | SLC2A2 |
| Glycyrrhiza uralensis Fisch. ex DC. | SLC2A3 |
| Glycyrrhiza uralensis Fisch. ex DC. | SLC5A4 |
| Glycyrrhiza uralensis Fisch. ex DC. | SMARCA2 |
| Glycyrrhiza uralensis Fisch. ex DC. | SNCA |
| Glycyrrhiza uralensis Fisch. ex DC. | SRC |
| Glycyrrhiza uralensis Fisch. ex DC. | SRD5A1 |
| Glycyrrhiza uralensis Fisch. ex DC. | SRD5A2 |
| Glycyrrhiza uralensis Fisch. ex DC. | SSTR2 |
| Glycyrrhiza uralensis Fisch. ex DC. | STAT6 |
| Glycyrrhiza uralensis Fisch. ex DC. | STS |
| Glycyrrhiza uralensis Fisch. ex DC. | SYK |
| Glycyrrhiza uralensis Fisch. ex DC. | TAAR1 |
| Glycyrrhiza uralensis Fisch. ex DC. | TACR2 |
| Glycyrrhiza uralensis Fisch. ex DC. | TACR3 |
| Glycyrrhiza uralensis Fisch. ex DC. | TAOK2 |
| Glycyrrhiza uralensis Fisch. ex DC. | TAOK3 |
| Glycyrrhiza uralensis Fisch. ex DC. | TBK1 |
| Glycyrrhiza uralensis Fisch. ex DC. | TBXA2R |
| Glycyrrhiza uralensis Fisch. ex DC. | TERT |
| Glycyrrhiza uralensis Fisch. ex DC. | TGFB1 |
| Glycyrrhiza uralensis Fisch. ex DC. | TGFBR1 |
| Glycyrrhiza uralensis Fisch. ex DC. | TGM2 |
| Glycyrrhiza uralensis Fisch. ex DC. | THRA |
| Glycyrrhiza uralensis Fisch. ex DC. | THRB |
| Glycyrrhiza uralensis Fisch. ex DC. | TLR9 |
| Glycyrrhiza uralensis Fisch. ex DC. | TNF |
| Glycyrrhiza uralensis Fisch. ex DC. | TNKS |
| Glycyrrhiza uralensis Fisch. ex DC. | TNNC1 |
| Glycyrrhiza uralensis Fisch. ex DC. | TNNI3 |
| Glycyrrhiza uralensis Fisch. ex DC. | TOP2B |
| Glycyrrhiza uralensis Fisch. ex DC. | TRPA1 |
| Glycyrrhiza uralensis Fisch. ex DC. | TRPM8 |
| Glycyrrhiza uralensis Fisch. ex DC. | TRPV1 |
| Glycyrrhiza uralensis Fisch. ex DC. | TSPO |
| Glycyrrhiza uralensis Fisch. ex DC. | TTR |
| Glycyrrhiza uralensis Fisch. ex DC. | TUBB1 |
| Glycyrrhiza uralensis Fisch. ex DC. | TYMP |
| Glycyrrhiza uralensis Fisch. ex DC. | TYMS |
| Glycyrrhiza uralensis Fisch. ex DC. | UGT2B7 |
| Glycyrrhiza uralensis Fisch. ex DC. | VCP |
| Glycyrrhiza uralensis Fisch. ex DC. | VDR |
| Glycyrrhiza uralensis Fisch. ex DC. | WDR5 |
| Glycyrrhiza uralensis Fisch. ex DC. | XIAP |
| Glycyrrhiza uralensis Fisch. ex DC. | YWHAG |
| Poria cocos（Schw.）Wolf | ADH1B |
| Poria cocos（Schw.）Wolf | ADH1C |
| Poria cocos（Schw.）Wolf | ADRA1B |
| Poria cocos（Schw.）Wolf | CHRM1 |
| Poria cocos（Schw.）Wolf | CHRM2 |
| Poria cocos（Schw.）Wolf | CHRM3 |
| Poria cocos（Schw.）Wolf | GABRA1 |
| Poria cocos（Schw.）Wolf | GRIA2 |
| Poria cocos（Schw.）Wolf | NCOA2 |
| Poria cocos（Schw.）Wolf | NR3C2 |
| Poria cocos（Schw.）Wolf | PTGS1 |
| Poria cocos（Schw.）Wolf | PTGS2 |
| Poria cocos（Schw.）Wolf | SCN5A |
| Poria cocos（Schw.）Wolf | SLC6A2 |
| Poria cocos（Schw.）Wolf | ACP1 |
| Poria cocos（Schw.）Wolf | AKR1A1 |
| Poria cocos（Schw.）Wolf | AKR1B1 |
| Poria cocos（Schw.）Wolf | AR |
| Poria cocos（Schw.）Wolf | CHRM5 |
| Poria cocos（Schw.）Wolf | CYP17A1 |
| Poria cocos（Schw.）Wolf | CYP19A1 |
| Poria cocos（Schw.）Wolf | ESR1 |
| Poria cocos（Schw.）Wolf | ESR2 |
| Poria cocos（Schw.）Wolf | HMGCR |
| Poria cocos（Schw.）Wolf | HSD11B1 |
| Poria cocos（Schw.）Wolf | MAPT |
| Poria cocos（Schw.）Wolf | NOS1 |
| Poria cocos（Schw.）Wolf | NOS2 |
| Poria cocos（Schw.）Wolf | NOS3 |
| Poria cocos（Schw.）Wolf | NR1H2 |
| Poria cocos（Schw.）Wolf | NR1H3 |
| Poria cocos（Schw.）Wolf | PTPN2 |
| Poria cocos（Schw.）Wolf | PTPRD |
| Poria cocos（Schw.）Wolf | PTPRF |
| Poria cocos（Schw.）Wolf | SLC6A3 |
| Poria cocos（Schw.）Wolf | SLC6A4 |
| Poria cocos（Schw.）Wolf | TBXA2R |
| Poria cocos（Schw.）Wolf | VDR |
| Bambusa tuldoides Munro | ADRA1B |
| Bambusa tuldoides Munro | ADRA1D |
| Bambusa tuldoides Munro | ADRA2A |
| Bambusa tuldoides Munro | ADRA2C |
| Bambusa tuldoides Munro | ADRB2 |
| Bambusa tuldoides Munro | GABRA1 |
| Bambusa tuldoides Munro | GRIA2 |
| Bambusa tuldoides Munro | LTA4H |
| Bambusa tuldoides Munro | MAOA |
| Bambusa tuldoides Munro | MAOB |
| Bambusa tuldoides Munro | PTGS1 |
| Bambusa tuldoides Munro | PTGS2 |
| Bambusa tuldoides Munro | SLC6A2 |
| Bambusa tuldoides Munro | SLC6A3 |
| Bambusa tuldoides Munro | AKR1C3 |
| Bambusa tuldoides Munro | AKR1C4 |
| Bambusa tuldoides Munro | APP |
| Bambusa tuldoides Munro | CA1 |
| Bambusa tuldoides Munro | CA12 |
| Bambusa tuldoides Munro | CA13 |
| Bambusa tuldoides Munro | CA14 |
| Bambusa tuldoides Munro | CA2 |
| Bambusa tuldoides Munro | CA3 |
| Bambusa tuldoides Munro | CA4 |
| Bambusa tuldoides Munro | CA5A |
| Bambusa tuldoides Munro | CA5B |
| Bambusa tuldoides Munro | CA6 |
| Bambusa tuldoides Munro | CA7 |
| Bambusa tuldoides Munro | CA9 |
| Bambusa tuldoides Munro | COMT |
| Bambusa tuldoides Munro | MAPT |
| Ziziphus jujuba Mill. | ACHE |
| Ziziphus jujuba Mill. | ADRA1A |
| Ziziphus jujuba Mill. | ADRA1B |
| Ziziphus jujuba Mill. | ADRA1D |
| Ziziphus jujuba Mill. | ADRA2B |
| Ziziphus jujuba Mill. | ADRA2C |
| Ziziphus jujuba Mill. | ADRB2 |
| Ziziphus jujuba Mill. | AHR |
| Ziziphus jujuba Mill. | AHSA1 |
| Ziziphus jujuba Mill. | AKR1B1 |
| Ziziphus jujuba Mill. | ALB |
| Ziziphus jujuba Mill. | ALOX5 |
| Ziziphus jujuba Mill. | AR |
| Ziziphus jujuba Mill. | BAX |
| Ziziphus jujuba Mill. | BCL2 |
| Ziziphus jujuba Mill. | CACNA1S |
| Ziziphus jujuba Mill. | CASP3 |
| Ziziphus jujuba Mill. | CASP8 |
| Ziziphus jujuba Mill. | CASP9 |
| Ziziphus jujuba Mill. | CAT |
| Ziziphus jujuba Mill. | CAV1 |
| Ziziphus jujuba Mill. | CCL2 |
| Ziziphus jujuba Mill. | CD40LG |
| Ziziphus jujuba Mill. | CHRM1 |
| Ziziphus jujuba Mill. | CHRM2 |
| Ziziphus jujuba Mill. | CHRM3 |
| Ziziphus jujuba Mill. | CHRM5 |
| Ziziphus jujuba Mill. | CHRNA2 |
| Ziziphus jujuba Mill. | CLDN4 |
| Ziziphus jujuba Mill. | COL1A1 |
| Ziziphus jujuba Mill. | COL3A1 |
| Ziziphus jujuba Mill. | CRP |
| Ziziphus jujuba Mill. | CTNNB1 |
| Ziziphus jujuba Mill. | CTSD |
| Ziziphus jujuba Mill. | CXCL10 |
| Ziziphus jujuba Mill. | CXCL8 |
| Ziziphus jujuba Mill. | CYP1A1 |
| Ziziphus jujuba Mill. | CYP1A2 |
| Ziziphus jujuba Mill. | CYP1B1 |
| Ziziphus jujuba Mill. | CYP3A4 |
| Ziziphus jujuba Mill. | DRD1 |
| Ziziphus jujuba Mill. | DRD2 |
| Ziziphus jujuba Mill. | DRD3 |
| Ziziphus jujuba Mill. | DRD4 |
| Ziziphus jujuba Mill. | DRD5 |
| Ziziphus jujuba Mill. | DUOX2 |
| Ziziphus jujuba Mill. | E2F1 |
| Ziziphus jujuba Mill. | E2F2 |
| Ziziphus jujuba Mill. | EGF |
| Ziziphus jujuba Mill. | EGFR |
| Ziziphus jujuba Mill. | ERBB2 |
| Ziziphus jujuba Mill. | ESR1 |
| Ziziphus jujuba Mill. | F3 |
| Ziziphus jujuba Mill. | F7 |
| Ziziphus jujuba Mill. | FOS |
| Ziziphus jujuba Mill. | GABRA1 |
| Ziziphus jujuba Mill. | GSTM1 |
| Ziziphus jujuba Mill. | GSTP1 |
| Ziziphus jujuba Mill. | HIF1A |
| Ziziphus jujuba Mill. | HK2 |
| Ziziphus jujuba Mill. | HMOX1 |
| Ziziphus jujuba Mill. | HSF1 |
| Ziziphus jujuba Mill. | HSPB1 |
| Ziziphus jujuba Mill. | HTR3A |
| Ziziphus jujuba Mill. | ICAM1 |
| Ziziphus jujuba Mill. | IFNG |
| Ziziphus jujuba Mill. | IGF2 |
| Ziziphus jujuba Mill. | IGFBP3 |
| Ziziphus jujuba Mill. | IL10 |
| Ziziphus jujuba Mill. | IL1A |
| Ziziphus jujuba Mill. | IL1B |
| Ziziphus jujuba Mill. | IL2 |
| Ziziphus jujuba Mill. | IL6 |
| Ziziphus jujuba Mill. | INSR |
| Ziziphus jujuba Mill. | IRF1 |
| Ziziphus jujuba Mill. | JUN |
| Ziziphus jujuba Mill. | KCNH2 |
| Ziziphus jujuba Mill. | KDR |
| Ziziphus jujuba Mill. | MAOB |
| Ziziphus jujuba Mill. | MAP2 |
| Ziziphus jujuba Mill. | MAPK1 |
| Ziziphus jujuba Mill. | MMP1 |
| Ziziphus jujuba Mill. | MMP2 |
| Ziziphus jujuba Mill. | MMP9 |
| Ziziphus jujuba Mill. | MPO |
| Ziziphus jujuba Mill. | MYC |
| Ziziphus jujuba Mill. | NCF1 |
| Ziziphus jujuba Mill. | NCOA1 |
| Ziziphus jujuba Mill. | NCOA2 |
| Ziziphus jujuba Mill. | NOS3 |
| Ziziphus jujuba Mill. | NPEPPS |
| Ziziphus jujuba Mill. | NQO1 |
| Ziziphus jujuba Mill. | NR1I2 |
| Ziziphus jujuba Mill. | NR1I3 |
| Ziziphus jujuba Mill. | NR3C2 |
| Ziziphus jujuba Mill. | ODC1 |
| Ziziphus jujuba Mill. | OPRD1 |
| Ziziphus jujuba Mill. | OPRM1 |
| Ziziphus jujuba Mill. | PARP1 |
| Ziziphus jujuba Mill. | PLAT |
| Ziziphus jujuba Mill. | PLAU |
| Ziziphus jujuba Mill. | PPARA |
| Ziziphus jujuba Mill. | PPARG |
| Ziziphus jujuba Mill. | PRKCA |
| Ziziphus jujuba Mill. | PRSS1 |
| Ziziphus jujuba Mill. | PTGER3 |
| Ziziphus jujuba Mill. | RASSF1 |
| Ziziphus jujuba Mill. | RB1 |
| Ziziphus jujuba Mill. | RUNX1T1 |
| Ziziphus jujuba Mill. | RUNX2 |
| Ziziphus jujuba Mill. | SCN5A |
| Ziziphus jujuba Mill. | SELE |
| Ziziphus jujuba Mill. | SERPINE1 |
| Ziziphus jujuba Mill. | SLC2A4 |
| Ziziphus jujuba Mill. | SLC6A2 |
| Ziziphus jujuba Mill. | SLC6A3 |
| Ziziphus jujuba Mill. | SLC6A4 |
| Ziziphus jujuba Mill. | SOD1 |
| Ziziphus jujuba Mill. | SPP1 |
| Ziziphus jujuba Mill. | THBD |
| Ziziphus jujuba Mill. | TOP1 |
| Ziziphus jujuba Mill. | TP63 |
| Ziziphus jujuba Mill. | VCAM1 |
| Ziziphus jujuba Mill. | VEGFA |
| Ziziphus jujuba Mill. | BACE1 |
| Ziziphus jujuba Mill. | BACE2 |
| Ziziphus jujuba Mill. | BCHE |
| Ziziphus jujuba Mill. | CA1 |
| Ziziphus jujuba Mill. | CA12 |
| Ziziphus jujuba Mill. | CA13 |
| Ziziphus jujuba Mill. | CA14 |
| Ziziphus jujuba Mill. | CA2 |
| Ziziphus jujuba Mill. | CA3 |
| Ziziphus jujuba Mill. | CA4 |
| Ziziphus jujuba Mill. | CA5A |
| Ziziphus jujuba Mill. | CA5B |
| Ziziphus jujuba Mill. | CA6 |
| Ziziphus jujuba Mill. | CA7 |
| Ziziphus jujuba Mill. | CA9 |
| Ziziphus jujuba Mill. | CHRNA4 |
| Ziziphus jujuba Mill. | CHRNB2 |
| Ziziphus jujuba Mill. | CYP17A1 |
| Ziziphus jujuba Mill. | CYP19A1 |
| Ziziphus jujuba Mill. | CYP2C19 |
| Ziziphus jujuba Mill. | DHCR7 |
| Ziziphus jujuba Mill. | DYRK1A |
| Ziziphus jujuba Mill. | ESR2 |
| Ziziphus jujuba Mill. | FDFT1 |
| Ziziphus jujuba Mill. | G6PD |
| Ziziphus jujuba Mill. | GLRA1 |
| Ziziphus jujuba Mill. | HMGCR |
| Ziziphus jujuba Mill. | HSD11B1 |
| Ziziphus jujuba Mill. | HSD11B2 |
| Ziziphus jujuba Mill. | HTR1A |
| Ziziphus jujuba Mill. | HTR1B |
| Ziziphus jujuba Mill. | HTR1D |
| Ziziphus jujuba Mill. | HTR2A |
| Ziziphus jujuba Mill. | HTR7 |
| Ziziphus jujuba Mill. | MAOA |
| Ziziphus jujuba Mill. | MAPK3 |
| Ziziphus jujuba Mill. | MAPT |
| Ziziphus jujuba Mill. | MBNL1 |
| Ziziphus jujuba Mill. | NOS2 |
| Ziziphus jujuba Mill. | NR1H2 |
| Ziziphus jujuba Mill. | NR1H3 |
| Ziziphus jujuba Mill. | NR3C1 |
| Ziziphus jujuba Mill. | PTGER2 |
| Ziziphus jujuba Mill. | PTPN2 |
| Ziziphus jujuba Mill. | RARA |
| Ziziphus jujuba Mill. | RARB |
| Ziziphus jujuba Mill. | RBP4 |
| Ziziphus jujuba Mill. | RORA |
| Ziziphus jujuba Mill. | SERPINA6 |
| Ziziphus jujuba Mill. | SHBG |
| Ziziphus jujuba Mill. | SIGMAR1 |
| Ziziphus jujuba Mill. | UGT2B7 |
| Ziziphus jujuba Mill. | VDR |
| Zingiber officinale Roscoe | ADH1C |
| Zingiber officinale Roscoe | ADRA1A |
| Zingiber officinale Roscoe | ADRA1B |
| Zingiber officinale Roscoe | ADRA2A |
| Zingiber officinale Roscoe | ADRB1 |
| Zingiber officinale Roscoe | ADRB2 |
| Zingiber officinale Roscoe | AKR1B1 |
| Zingiber officinale Roscoe | BAX |
| Zingiber officinale Roscoe | BCL2 |
| Zingiber officinale Roscoe | CASP3 |
| Zingiber officinale Roscoe | CASP8 |
| Zingiber officinale Roscoe | CASP9 |
| Zingiber officinale Roscoe | CHRM1 |
| Zingiber officinale Roscoe | CHRM2 |
| Zingiber officinale Roscoe | CHRM3 |
| Zingiber officinale Roscoe | CHRNA2 |
| Zingiber officinale Roscoe | ESR1 |
| Zingiber officinale Roscoe | GABRA1 |
| Zingiber officinale Roscoe | JUN |
| Zingiber officinale Roscoe | KCNH2 |
| Zingiber officinale Roscoe | LTA4H |
| Zingiber officinale Roscoe | MAOA |
| Zingiber officinale Roscoe | MAOB |
| Zingiber officinale Roscoe | MAP2 |
| Zingiber officinale Roscoe | NCOA1 |
| Zingiber officinale Roscoe | NCOA2 |
| Zingiber officinale Roscoe | NR3C2 |
| Zingiber officinale Roscoe | OPRM1 |
| Zingiber officinale Roscoe | PLAU |
| Zingiber officinale Roscoe | PON1 |
| Zingiber officinale Roscoe | PRKCA |
| Zingiber officinale Roscoe | PTGS1 |
| Zingiber officinale Roscoe | PTGS2 |
| Zingiber officinale Roscoe | SCN5A |
| Zingiber officinale Roscoe | SLC6A2 |
| Zingiber officinale Roscoe | SLC6A3 |
| Zingiber officinale Roscoe | SLC6A4 |
| Zingiber officinale Roscoe | ACHE |
| Zingiber officinale Roscoe | AR |
| Zingiber officinale Roscoe | BCHE |
| Zingiber officinale Roscoe | CYP17A1 |
| Zingiber officinale Roscoe | CYP19A1 |
| Zingiber officinale Roscoe | CYP2C19 |
| Zingiber officinale Roscoe | DHCR7 |
| Zingiber officinale Roscoe | ESR2 |
| Zingiber officinale Roscoe | FDFT1 |
| Zingiber officinale Roscoe | G6PD |
| Zingiber officinale Roscoe | GLRA1 |
| Zingiber officinale Roscoe | HMGCR |
| Zingiber officinale Roscoe | HSD11B1 |
| Zingiber officinale Roscoe | HSD11B2 |
| Zingiber officinale Roscoe | LDLR |
| Zingiber officinale Roscoe | LRP8 |
| Zingiber officinale Roscoe | NOS2 |
| Zingiber officinale Roscoe | NR1H2 |
| Zingiber officinale Roscoe | NR1H3 |
| Zingiber officinale Roscoe | NR1I3 |
| Zingiber officinale Roscoe | NR3C1 |
| Zingiber officinale Roscoe | PPARA |
| Zingiber officinale Roscoe | PPARG |
| Zingiber officinale Roscoe | PTGER2 |
| Zingiber officinale Roscoe | RORA |
| Zingiber officinale Roscoe | SERPINA6 |
| Zingiber officinale Roscoe | SHBG |
| Zingiber officinale Roscoe | SIGMAR1 |
| Zingiber officinale Roscoe | UGT2B7 |
| Zingiber officinale Roscoe | VDR |
| Citrus reticulata Blanco | ABAT |
| Citrus reticulata Blanco | ABCC1 |
| Citrus reticulata Blanco | ADIPOQ |
| Citrus reticulata Blanco | AKR1C1 |
| Citrus reticulata Blanco | AKT1 |
| Citrus reticulata Blanco | APOB |
| Citrus reticulata Blanco | AR |
| Citrus reticulata Blanco | BAX |
| Citrus reticulata Blanco | BCL2 |
| Citrus reticulata Blanco | CA12 |
| Citrus reticulata Blanco | CA4 |
| Citrus reticulata Blanco | CA7 |
| Citrus reticulata Blanco | CASP3 |
| Citrus reticulata Blanco | CASP9 |
| Citrus reticulata Blanco | CAT |
| Citrus reticulata Blanco | CES1 |
| Citrus reticulata Blanco | CREB1 |
| Citrus reticulata Blanco | CYP19A1 |
| Citrus reticulata Blanco | CYP1B1 |
| Citrus reticulata Blanco | EPHB2 |
| Citrus reticulata Blanco | ESR1 |
| Citrus reticulata Blanco | ESR2 |
| Citrus reticulata Blanco | F7 |
| Citrus reticulata Blanco | GSK3B |
| Citrus reticulata Blanco | GSR |
| Citrus reticulata Blanco | GSTP1 |
| Citrus reticulata Blanco | HMGCR |
| Citrus reticulata Blanco | HSD17B1 |
| Citrus reticulata Blanco | JUN |
| Citrus reticulata Blanco | KCNH2 |
| Citrus reticulata Blanco | LDLR |
| Citrus reticulata Blanco | MAPK1 |
| Citrus reticulata Blanco | MAPK3 |
| Citrus reticulata Blanco | MAPK8 |
| Citrus reticulata Blanco | MMP9 |
| Citrus reticulata Blanco | NCOA1 |
| Citrus reticulata Blanco | NCOA2 |
| Citrus reticulata Blanco | NOS2 |
| Citrus reticulata Blanco | NR3C2 |
| Citrus reticulata Blanco | PLA2G4A |
| Citrus reticulata Blanco | PLB1 |
| Citrus reticulata Blanco | PPARA |
| Citrus reticulata Blanco | PPARG |
| Citrus reticulata Blanco | PRSS1 |
| Citrus reticulata Blanco | PTGS1 |
| Citrus reticulata Blanco | PTGS2 |
| Citrus reticulata Blanco | SCN5A |
| Citrus reticulata Blanco | SHBG |
| Citrus reticulata Blanco | SOD1 |
| Citrus reticulata Blanco | SREBF1 |
| Citrus reticulata Blanco | TIMP1 |
| Citrus reticulata Blanco | TP63 |
| Citrus reticulata Blanco | UGT1A1 |
| Citrus reticulata Blanco | ABCB1 |
| Citrus reticulata Blanco | ACHE |
| Citrus reticulata Blanco | ADCY5 |
| Citrus reticulata Blanco | ADORA1 |
| Citrus reticulata Blanco | ADORA2A |
| Citrus reticulata Blanco | ADORA3 |
| Citrus reticulata Blanco | AKR1B1 |
| Citrus reticulata Blanco | AKR1C3 |
| Citrus reticulata Blanco | ALOX5 |
| Citrus reticulata Blanco | APP |
| Citrus reticulata Blanco | BACE1 |
| Citrus reticulata Blanco | BCHE |
| Citrus reticulata Blanco | CA1 |
| Citrus reticulata Blanco | CA13 |
| Citrus reticulata Blanco | CA2 |
| Citrus reticulata Blanco | CA3 |
| Citrus reticulata Blanco | CA5A |
| Citrus reticulata Blanco | CA5B |
| Citrus reticulata Blanco | CA6 |
| Citrus reticulata Blanco | CA9 |
| Citrus reticulata Blanco | CDK5 |
| Citrus reticulata Blanco | CHRM2 |
| Citrus reticulata Blanco | CHRNA7 |
| Citrus reticulata Blanco | CYP17A1 |
| Citrus reticulata Blanco | CYP2C19 |
| Citrus reticulata Blanco | CYP2C9 |
| Citrus reticulata Blanco | CYP3A4 |
| Citrus reticulata Blanco | DHCR7 |
| Citrus reticulata Blanco | DYRK1A |
| Citrus reticulata Blanco | DYRK1B |
| Citrus reticulata Blanco | EDNRA |
| Citrus reticulata Blanco | ESRRA |
| Citrus reticulata Blanco | F3 |
| Citrus reticulata Blanco | FDFT1 |
| Citrus reticulata Blanco | FGFR1 |
| Citrus reticulata Blanco | G6PD |
| Citrus reticulata Blanco | GLRA1 |
| Citrus reticulata Blanco | GRM5 |
| Citrus reticulata Blanco | HSD11B1 |
| Citrus reticulata Blanco | HSD11B2 |
| Citrus reticulata Blanco | HSD17B2 |
| Citrus reticulata Blanco | IGF1R |
| Citrus reticulata Blanco | IGFBP3 |
| Citrus reticulata Blanco | INSR |
| Citrus reticulata Blanco | KDR |
| Citrus reticulata Blanco | KIT |
| Citrus reticulata Blanco | LCK |
| Citrus reticulata Blanco | MAOB |
| Citrus reticulata Blanco | MET |
| Citrus reticulata Blanco | MMP12 |
| Citrus reticulata Blanco | MMP13 |
| Citrus reticulata Blanco | MMP2 |
| Citrus reticulata Blanco | NOX4 |
| Citrus reticulata Blanco | NR1H2 |
| Citrus reticulata Blanco | NR1H3 |
| Citrus reticulata Blanco | NR1I3 |
| Citrus reticulata Blanco | NR3C1 |
| Citrus reticulata Blanco | OPRD1 |
| Citrus reticulata Blanco | OPRM1 |
| Citrus reticulata Blanco | PGF |
| Citrus reticulata Blanco | PIK3CA |
| Citrus reticulata Blanco | PLA2G2A |
| Citrus reticulata Blanco | PTGER2 |
| Citrus reticulata Blanco | PTGER3 |
| Citrus reticulata Blanco | RORA |
| Citrus reticulata Blanco | SERPINA6 |
| Citrus reticulata Blanco | SERPINE1 |
| Citrus reticulata Blanco | SIGMAR1 |
| Citrus reticulata Blanco | SLC6A2 |
| Citrus reticulata Blanco | SLC6A4 |
| Citrus reticulata Blanco | SRC |
| Citrus reticulata Blanco | SYK |
| Citrus reticulata Blanco | UGT2B7 |
| Citrus reticulata Blanco | VCP |
| Citrus reticulata Blanco | VDR |
| Citrus reticulata Blanco | VEGFA |
| Citrus reticulata Blanco | YWHAG |
| Citrus aurantium L. | ABAT |
| Citrus aurantium L. | ABCC1 |
| Citrus aurantium L. | ACHE |
| Citrus aurantium L. | ADCY2 |
| Citrus aurantium L. | ADIPOQ |
| Citrus aurantium L. | ADORA1 |
| Citrus aurantium L. | ADRA1B |
| Citrus aurantium L. | ADRA1D |
| Citrus aurantium L. | ADRA2C |
| Citrus aurantium L. | ADRB2 |
| Citrus aurantium L. | AKR1B1 |
| Citrus aurantium L. | AKR1C1 |
| Citrus aurantium L. | AKT1 |
| Citrus aurantium L. | ALOX5 |
| Citrus aurantium L. | APOB |
| Citrus aurantium L. | APP |
| Citrus aurantium L. | AR |
| Citrus aurantium L. | ARG1 |
| Citrus aurantium L. | BAX |
| Citrus aurantium L. | BCL2 |
| Citrus aurantium L. | CA12 |
| Citrus aurantium L. | CA2 |
| Citrus aurantium L. | CA4 |
| Citrus aurantium L. | CA7 |
| Citrus aurantium L. | CASP3 |
| Citrus aurantium L. | CASP9 |
| Citrus aurantium L. | CAT |
| Citrus aurantium L. | CCND1 |
| Citrus aurantium L. | CD38 |
| Citrus aurantium L. | CD40LG |
| Citrus aurantium L. | CDK5 |
| Citrus aurantium L. | CES1 |
| Citrus aurantium L. | CHRM1 |
| Citrus aurantium L. | CHRM3 |
| Citrus aurantium L. | CREB1 |
| Citrus aurantium L. | CYP19A1 |
| Citrus aurantium L. | CYP1B1 |
| Citrus aurantium L. | EGFR |
| Citrus aurantium L. | EPHB2 |
| Citrus aurantium L. | ERBB2 |
| Citrus aurantium L. | ESR1 |
| Citrus aurantium L. | ESR2 |
| Citrus aurantium L. | F7 |
| Citrus aurantium L. | FLT3 |
| Citrus aurantium L. | GABRA1 |
| Citrus aurantium L. | GLO1 |
| Citrus aurantium L. | GSK3B |
| Citrus aurantium L. | GSTP1 |
| Citrus aurantium L. | HMGCR |
| Citrus aurantium L. | HMOX1 |
| Citrus aurantium L. | HSD17B1 |
| Citrus aurantium L. | ICAM1 |
| Citrus aurantium L. | IFNG |
| Citrus aurantium L. | IL10 |
| Citrus aurantium L. | IL2 |
| Citrus aurantium L. | IL4 |
| Citrus aurantium L. | IL6 |
| Citrus aurantium L. | INSR |
| Citrus aurantium L. | JUN |
| Citrus aurantium L. | KCNH2 |
| Citrus aurantium L. | LDLR |
| Citrus aurantium L. | MAOA |
| Citrus aurantium L. | MAOB |
| Citrus aurantium L. | MAPK1 |
| Citrus aurantium L. | MAPK14 |
| Citrus aurantium L. | MAPK3 |
| Citrus aurantium L. | MAPK8 |
| Citrus aurantium L. | MDM2 |
| Citrus aurantium L. | MET |
| Citrus aurantium L. | MMP1 |
| Citrus aurantium L. | MMP12 |
| Citrus aurantium L. | MMP2 |
| Citrus aurantium L. | MMP9 |
| Citrus aurantium L. | NCOA1 |
| Citrus aurantium L. | NCOA2 |
| Citrus aurantium L. | NOS2 |
| Citrus aurantium L. | NOX4 |
| Citrus aurantium L. | PARP1 |
| Citrus aurantium L. | PLA2G4A |
| Citrus aurantium L. | PLB1 |
| Citrus aurantium L. | PPARA |
| Citrus aurantium L. | PPARG |
| Citrus aurantium L. | PRSS1 |
| Citrus aurantium L. | PTGS1 |
| Citrus aurantium L. | PTGS2 |
| Citrus aurantium L. | RB1 |
| Citrus aurantium L. | SCN5A |
| Citrus aurantium L. | SHBG |
| Citrus aurantium L. | SLC2A4 |
| Citrus aurantium L. | SOD1 |
| Citrus aurantium L. | SREBF1 |
| Citrus aurantium L. | SYK |
| Citrus aurantium L. | TIMP1 |
| Citrus aurantium L. | TNKS |
| Citrus aurantium L. | TOP1 |
| Citrus aurantium L. | TP63 |
| Citrus aurantium L. | TTR |
| Citrus aurantium L. | TYR |
| Citrus aurantium L. | UGT1A1 |
| Citrus aurantium L. | VEGFA |
| Citrus aurantium L. | XDH |
| Citrus aurantium L. | ABCB1 |
| Citrus aurantium L. | ABL1 |
| Citrus aurantium L. | ACE |
| Citrus aurantium L. | ADCY5 |
| Citrus aurantium L. | ADORA2A |
| Citrus aurantium L. | ADORA2B |
| Citrus aurantium L. | ADORA3 |
| Citrus aurantium L. | ADRA1A |
| Citrus aurantium L. | ADRA2A |
| Citrus aurantium L. | ADRA2B |
| Citrus aurantium L. | AGTR2 |
| Citrus aurantium L. | AHR |
| Citrus aurantium L. | AKR1A1 |
| Citrus aurantium L. | AKR1C3 |
| Citrus aurantium L. | AKR1C4 |
| Citrus aurantium L. | ALK |
| Citrus aurantium L. | ALOX15 |
| Citrus aurantium L. | ALPL |
| Citrus aurantium L. | AMY1A |
| Citrus aurantium L. | AOC3 |
| Citrus aurantium L. | APEX1 |
| Citrus aurantium L. | ATP4A |
| Citrus aurantium L. | AURKA |
| Citrus aurantium L. | AVPR1A |
| Citrus aurantium L. | AVPR2 |
| Citrus aurantium L. | BACE1 |
| Citrus aurantium L. | BACE2 |
| Citrus aurantium L. | BCHE |
| Citrus aurantium L. | BMP4 |
| Citrus aurantium L. | BRD2 |
| Citrus aurantium L. | BRPF1 |
| Citrus aurantium L. | BRS3 |
| Citrus aurantium L. | CA1 |
| Citrus aurantium L. | CA13 |
| Citrus aurantium L. | CA14 |
| Citrus aurantium L. | CA3 |
| Citrus aurantium L. | CA5A |
| Citrus aurantium L. | CA5B |
| Citrus aurantium L. | CA6 |
| Citrus aurantium L. | CA9 |
| Citrus aurantium L. | CAMK2B |
| Citrus aurantium L. | CAPN1 |
| Citrus aurantium L. | CCKBR |
| Citrus aurantium L. | CCNA2 |
| Citrus aurantium L. | CCR1 |
| Citrus aurantium L. | CCR2 |
| Citrus aurantium L. | CCR4 |
| Citrus aurantium L. | CCR9 |
| Citrus aurantium L. | CDK2 |
| Citrus aurantium L. | CFTR |
| Citrus aurantium L. | CHRNA7 |
| Citrus aurantium L. | CMA1 |
| Citrus aurantium L. | CNR1 |
| Citrus aurantium L. | CNR2 |
| Citrus aurantium L. | CREBBP |
| Citrus aurantium L. | CTSD |
| Citrus aurantium L. | CXCL8 |
| Citrus aurantium L. | CXCR1 |
| Citrus aurantium L. | CYP17A1 |
| Citrus aurantium L. | CYP1A1 |
| Citrus aurantium L. | CYP1A2 |
| Citrus aurantium L. | CYP2C9 |
| Citrus aurantium L. | CYP3A4 |
| Citrus aurantium L. | DNMT3A |
| Citrus aurantium L. | DRD4 |
| Citrus aurantium L. | DYRK1A |
| Citrus aurantium L. | DYRK1B |
| Citrus aurantium L. | DYRK2 |
| Citrus aurantium L. | EDNRA |
| Citrus aurantium L. | EDNRB |
| Citrus aurantium L. | EIF2AK3 |
| Citrus aurantium L. | ELANE |
| Citrus aurantium L. | EPHX2 |
| Citrus aurantium L. | ERBB4 |
| Citrus aurantium L. | ESRRA |
| Citrus aurantium L. | F10 |
| Citrus aurantium L. | F2 |
| Citrus aurantium L. | F3 |
| Citrus aurantium L. | FAAH |
| Citrus aurantium L. | FGFR1 |
| Citrus aurantium L. | FPR1 |
| Citrus aurantium L. | FPR2 |
| Citrus aurantium L. | GABRA2 |
| Citrus aurantium L. | GABRA3 |
| Citrus aurantium L. | GABRA5 |
| Citrus aurantium L. | GABRA6 |
| Citrus aurantium L. | GABRB3 |
| Citrus aurantium L. | GABRG2 |
| Citrus aurantium L. | GRK6 |
| Citrus aurantium L. | GRM2 |
| Citrus aurantium L. | GRM5 |
| Citrus aurantium L. | HCRTR1 |
| Citrus aurantium L. | HCRTR2 |
| Citrus aurantium L. | HDAC1 |
| Citrus aurantium L. | HDAC2 |
| Citrus aurantium L. | HIF1A |
| Citrus aurantium L. | HRAS |
| Citrus aurantium L. | HRH3 |
| Citrus aurantium L. | HSD11B1 |
| Citrus aurantium L. | HSD17B2 |
| Citrus aurantium L. | HSF1 |
| Citrus aurantium L. | HSP90AA1 |
| Citrus aurantium L. | HTR1B |
| Citrus aurantium L. | HTR2C |
| Citrus aurantium L. | IDO1 |
| Citrus aurantium L. | IGF1R |
| Citrus aurantium L. | IGFBP3 |
| Citrus aurantium L. | ITGA4 |
| Citrus aurantium L. | ITK |
| Citrus aurantium L. | JAK1 |
| Citrus aurantium L. | JAK2 |
| Citrus aurantium L. | KCNA3 |
| Citrus aurantium L. | KDR |
| Citrus aurantium L. | KIT |
| Citrus aurantium L. | LCK |
| Citrus aurantium L. | LGALS1 |
| Citrus aurantium L. | LIPE |
| Citrus aurantium L. | LRRK2 |
| Citrus aurantium L. | MAP2K1 |
| Citrus aurantium L. | MAPK10 |
| Citrus aurantium L. | MAPK9 |
| Citrus aurantium L. | MAPT |
| Citrus aurantium L. | MCHR1 |
| Citrus aurantium L. | MGMT |
| Citrus aurantium L. | MMP13 |
| Citrus aurantium L. | MMP7 |
| Citrus aurantium L. | MMP8 |
| Citrus aurantium L. | MPO |
| Citrus aurantium L. | MTNR1A |
| Citrus aurantium L. | MTNR1B |
| Citrus aurantium L. | MTOR |
| Citrus aurantium L. | NCSTN |
| Citrus aurantium L. | NOS1 |
| Citrus aurantium L. | NPY5R |
| Citrus aurantium L. | NQO1 |
| Citrus aurantium L. | NTRK1 |
| Citrus aurantium L. | ODC1 |
| Citrus aurantium L. | OPRD1 |
| Citrus aurantium L. | OPRM1 |
| Citrus aurantium L. | OXTR |
| Citrus aurantium L. | P2RX3 |
| Citrus aurantium L. | PDE10A |
| Citrus aurantium L. | PDE4B |
| Citrus aurantium L. | PDE4D |
| Citrus aurantium L. | PDE5A |
| Citrus aurantium L. | PDE8B |
| Citrus aurantium L. | PDPK1 |
| Citrus aurantium L. | PGF |
| Citrus aurantium L. | PIK3CA |
| Citrus aurantium L. | PIK3CG |
| Citrus aurantium L. | PIK3R1 |
| Citrus aurantium L. | PLA2G2A |
| Citrus aurantium L. | PLA2G7 |
| Citrus aurantium L. | PLG |
| Citrus aurantium L. | PPOX |
| Citrus aurantium L. | PRKCA |
| Citrus aurantium L. | PRKCD |
| Citrus aurantium L. | PRKCG |
| Citrus aurantium L. | PSEN1 |
| Citrus aurantium L. | PSEN2 |
| Citrus aurantium L. | PSENEN |
| Citrus aurantium L. | PTAFR |
| Citrus aurantium L. | PTGER2 |
| Citrus aurantium L. | PTGER3 |
| Citrus aurantium L. | RPS6KB1 |
| Citrus aurantium L. | SCN10A |
| Citrus aurantium L. | SCN9A |
| Citrus aurantium L. | SERPINE1 |
| Citrus aurantium L. | SIGMAR1 |
| Citrus aurantium L. | SLC5A4 |
| Citrus aurantium L. | SLC6A4 |
| Citrus aurantium L. | SNCA |
| Citrus aurantium L. | SRC |
| Citrus aurantium L. | SRD5A1 |
| Citrus aurantium L. | TAAR1 |
| Citrus aurantium L. | TERT |
| Citrus aurantium L. | TGFBR1 |
| Citrus aurantium L. | TK2 |
| Citrus aurantium L. | TLR4 |
| Citrus aurantium L. | TRPV1 |
| Citrus aurantium L. | TYK2 |
| Citrus aurantium L. | TYMP |
| Citrus aurantium L. | UTS2R |
| Citrus aurantium L. | VCP |
| Citrus aurantium L. | YWHAG |

# Supplementary table5| KEGG pathways of Wendan Decoction treating Generalized Anxiety Disorder

| term ID | term description | observed gene count | background gene count | strength | false discovery rate | matching proteins in your network (labels) |
| --- | --- | --- | --- | --- | --- | --- |
| hsa04080 | Neuroactive ligand-receptor interaction | 101 | 330 | 1.02 | 2.62E-61 | DRD4,CTSG,GNRHR,NR3C1,KISS1R,OPRD1,PTGER2,MCHR1,CHRM3,MTNR1B,HTR2B,CHRNB4,P2RX3,THRA,OPRK1,GABRA6,GABRB2,TAAR1,HTR2C,ADRA2A,HTR6,GRIA2,AVPR1A,MTNR1A,TACR3,PTGDR,ADORA2B,ADRB2,DRD5,GRM5,CHRM1,ADRA1B,F2,PRSS1,GABRB3,PLG,EDNRA,CHRNA3,HTR1A,UTS2R,OXTR,P2RX7,CALCA,CCKBR,GABRA5,ADORA2A,HTR7,HRH3,ADRB3,PTGER3,SSTR2,AVPR2,DRD2,GRM1,ADORA1,CHRNB2,ADRB1,CNR1,HTR1B,CHRNA4,GABRA3,BRS3,GRIN1,AGTR2,TACR2,PTAFR,CNR2,HTR1D,EDNRB,ADRA1D,ADRA1A,CHRM5,DRD3,DRD1,GRM2,TSPO,GRIN2A,THRB,LTB4R,CRHR1,GCGR,HCRTR1,CHRNA2,ADRA2C,CALCRL,GABRA1,TBXA2R,OPRM1,CHRM2,GLRA1,AGTR1,GABRA2,NPY5R,GRIA1,HTR2A,GRM4,TRPV1,FPR2,FPR1,HCRTR2,ADRA2B |
| hsa05200 | Pathways in cancer | 113 | 517 | 0.88 | 2.68E-56 | MAPK1,HMOX1,MMP2,TGFB1,RPS6KB1,NFKB1,IL2,CCND1,IFNG,IL4,FLT3,BMP4,PTGER2,RAF1,RARA,PDGFRA,MDM2,ITGAV,PDGFRB,CREBBP,MAP2K2,MAPK3,EP300,PRKCG,PIK3CA,STAT3,EGF,CDK2,RB1,IGF1R,ERBB2,CCNA2,EGFR,CSF1R,PPARG,KIT,BRAF,BAX,SHH,HSP90B1,STAT6,MAP2K1,FOS,CXCL8,CYCS,F2,TERT,PRKACA,CASP3,GSTM1,EDNRA,MET,NQO1,MMP1,GSK3B,NOS2,CASP9,RARB,HSP90AA1,FGFR3,ADCY2,JAK1,ESR2,CTNNB1,E2F1,RET,PTGER3,RASSF1,CASP8,MAPK10,STAT1,MTOR,E2F2,EGLN1,PTGS2,XIAP,JUN,MMP9,ABL1,HDAC1,AR,TGFBR1,EDNRB,JAK2,ALK,AKT2,MAPK8,CAMK2B,BCL2,GSTP1,RASGRP3,NCOA1,IL6,CXCR4,IGF2,FGFR1,MAPK9,RUNX1T1,ESR1,HRAS,PRKCA,FGFR2,SLC2A1,ADCY5,AGTR1,PIK3R1,HDAC2,NTRK1,HIF1A,PGF,AKT1,VEGFA,MYC |
| hsa04020 | Calcium signaling pathway | 57 | 193 | 1.01 | 3.98E-33 | CD38,TNNC1,CHRM3,PDGFRA,HTR2B,PDGFRB,P2RX3,PRKCG,EGF,ERBB2,EGFR,HTR2C,HTR6,NOS3,AVPR1A,TACR3,ADORA2B,ADRB2,DRD5,GRM5,CHRM1,ADRA1B,PRKACA,EDNRA,OXTR,NOS2,P2RX7,CCKBR,ADORA2A,HTR7,ERBB4,ADCY2,ADRB3,PTGER3,MYLK,GRM1,CACNA1S,ADRB1,GRIN1,TACR2,PTAFR,EDNRB,ADRA1D,ADRA1A,CHRM5,DRD1,PPP3CA,CAMK2B,GRIN2A,CXCR4,TBXA2R,CHRM2,PRKCA,AGTR1,HTR2A,PHKG2,NOS1 |
| hsa05167 | Kaposi sarcoma-associated herpesvirus infection | 56 | 187 | 1.01 | 6.57E-33 | MAPK1,NFKB1,CCND1,MAPK14,EIF2AK2,RAF1,CREBBP,MAP2K2,MAPK3,EP300,PIK3CA,STAT3,ICAM1,RB1,CCR5,BAX,CCR1,MAP2K1,FOS,CXCL8,CYCS,CASP3,GSK3B,TBK1,CASP9,CCR4,JAK1,CTNNB1,E2F1,CASP8,PIK3CG,MAPK10,STAT1,MTOR,E2F2,PTGS2,JUN,SRC,SYK,JAK2,AKT2,PPP3CA,MAPK8,IL6,CREB1,MAPK9,HRAS,PIK3R1,LYN,TYK2,HIF1A,CCR3,AKT1,IKBKE,VEGFA,MYC |
| hsa04933 | AGE-RAGE signaling pathway in diabetic complications | 44 | 98 | 1.19 | 1.04E-31 | MAPK1,MMP2,TGFB1,SERPINE1,CCL2,COL1A1,NFKB1,CCND1,MAPK14,MAPK3,NOX4,IL1A,IL1B,PIK3CA,STAT3,ICAM1,BAX,VCAM1,NOS3,COL3A1,PRKCE,CXCL8,CASP3,SELE,F3,MAPK10,STAT1,JUN,TGFBR1,THBD,JAK2,AKT2,PRKCD,MAPK8,BCL2,IL6,MAPK9,TNF,HRAS,PRKCA,AGTR1,PIK3R1,AKT1,VEGFA |
| hsa05161 | Hepatitis B | 51 | 159 | 1.04 | 3.18E-31 | MAPK1,TGFB1,NFKB1,MAPK14,RAF1,CREBBP,MAP2K2,MAPK3,EP300,PRKCG,PIK3CA,STAT3,CDK2,RB1,CCNA2,BRAF,BAX,STAT6,MAP2K1,FOS,CXCL8,CYCS,CASP3,TBK1,CASP9,JAK1,E2F1,CASP8,MAPK10,STAT1,E2F2,JUN,MMP9,SRC,TLR4,TGFBR1,JAK2,AKT2,MAPK8,BCL2,IL6,CREB1,MAPK9,TNF,HRAS,PRKCA,PIK3R1,TYK2,AKT1,IKBKE,MYC |
| hsa05215 | Prostate cancer | 43 | 96 | 1.19 | 4.44E-31 | MAPK1,PLAT,NFKB1,CCND1,RAF1,PDGFRA,MDM2,PDGFRB,CREBBP,MAP2K2,MAPK3,EP300,PIK3CA,EGF,CDK2,RB1,IGF1R,ERBB2,EGFR,BRAF,HSP90B1,MAP2K1,GSK3B,CASP9,HSP90AA1,PDPK1,CTNNB1,E2F1,MTOR,E2F2,MMP9,PLAU,AR,AKT2,BCL2,GSTP1,CREB1,FGFR1,HRAS,FGFR2,PIK3R1,AKT1,SRD5A2 |
| hsa05163 | Human cytomegalovirus infection | 56 | 218 | 0.95 | 2.86E-30 | MAPK1,RPS6KB1,CCL2,NFKB1,CCND1,MAPK14,PTGER2,RAF1,PDGFRA,MDM2,ITGAV,MAP2K2,MAPK3,IL1B,PRKCG,PIK3CA,STAT3,RB1,EGFR,CCR5,BAX,CCR1,MAP2K1,CXCL8,CYCS,PRKACA,CASP3,CXCR2,GSK3B,TBK1,CASP9,ADCY2,JAK1,CTNNB1,E2F1,PTGER3,CASP8,MTOR,E2F2,PTGS2,SRC,AKT2,PPP3CA,IL6,CXCR4,CREB1,TNF,HRAS,PRKCA,ADCY5,PIK3R1,CCR3,AKT1,ITGB3,VEGFA,MYC |
| hsa04024 | cAMP signaling pathway | 54 | 208 | 0.95 | 2.13E-29 | CFTR,MAPK1,NFKB1,LIPE,PTGER2,RAF1,CREBBP,MAP2K2,MAPK3,EP300,PIK3CA,BRAF,HTR6,GRIA2,MAP2K1,ADRB2,DRD5,FOS,CHRM1,PRKACA,EDNRA,HTR1A,OXTR,PDE4B,ADORA2A,TNNI3,ADCY2,PDE4D,PTGER3,SSTR2,MAPK10,DRD2,CACNA1S,ADORA1,ADRB1,HTR1B,JUN,GRIN1,HTR1D,PDE4A,AKT2,DRD1,MAPK8,CAMK2B,GRIN2A,PPARA,CREB1,MAPK9,CHRM2,ADCY5,PIK3R1,GRIA1,PDE10A,AKT1 |
| hsa04151 | PI3K-Akt signaling pathway | 64 | 350 | 0.8 | 1.93E-27 | MAPK1,RPS6KB1,COL1A1,NFKB1,IL2,CCND1,IL4,FLT3,RAF1,PDGFRA,MDM2,ITGAV,PDGFRB,MAP2K2,MAPK3,KDR,PIK3CA,EGF,CDK2,IGF1R,ERBB2,EGFR,NTRK2,CSF1R,KIT,NOS3,HSP90B1,MAP2K1,INSR,YWHAG,CHRM1,MET,GSK3B,CASP9,HSP90AA1,FGFR3,ERBB4,JAK1,PDPK1,PIK3CG,MTOR,SGK1,TLR4,SYK,JAK2,AKT2,SPP1,ITGA4,BCL2,IL6,CREB1,IGF2,FGFR1,CHRM2,HRAS,PRKCA,FGFR2,PIK3R1,NTRK1,PGF,AKT1,ITGB3,VEGFA,MYC |
| hsa05206 | MicroRNAs in cancer | 46 | 160 | 1 | 1.30E-26 | SIRT1,MAPK1,HMOX1,NFKB1,CCND1,RAF1,PDGFRA,MDM2,PDGFRB,CREBBP,MAP2K2,MAPK3,EP300,PRKCG,PIK3CA,HDAC4,STAT3,DNMT3A,TP63,ERBB2,EGFR,MAP2K1,PRKCE,CASP3,MET,FGFR3,E2F1,RASSF1,MTOR,E2F2,PTGS2,MMP9,ABL1,PLAU,HDAC1,BCL2,ABCC1,HRAS,PRKCA,PIK3R1,HDAC2,ITGB3,ABCB1,CYP1B1,VEGFA,MYC |
| hsa01522 | Endocrine resistance | 38 | 95 | 1.14 | 3.55E-26 | MAPK1,MMP2,RPS6KB1,CCND1,MAPK14,RAF1,MDM2,MAP2K2,MAPK3,PIK3CA,RB1,IGF1R,NCOR1,ERBB2,EGFR,BRAF,BAX,MAP2K1,FOS,PRKACA,ADCY2,ESR2,E2F1,MAPK10,MTOR,E2F2,JUN,MMP9,SRC,AKT2,MAPK8,BCL2,MAPK9,ESR1,HRAS,ADCY5,PIK3R1,AKT1 |
| hsa05205 | Proteoglycans in cancer | 49 | 196 | 0.93 | 4.01E-26 | MAPK1,MMP2,TGFB1,RPS6KB1,COL1A1,CCND1,MAPK14,RAF1,MDM2,ITGAV,MAP2K2,MAPK3,PRKCG,KDR,PIK3CA,STAT3,IGF1R,ERBB2,EGFR,BRAF,SHH,MAP2K1,PRKACA,CASP3,MET,CAV1,PTPN11,ERBB4,PDPK1,CTNNB1,MTOR,MMP9,PLAU,SRC,TLR4,AKT2,CAMK2B,IGF2,FGFR1,TNF,ESR1,HRAS,PRKCA,PIK3R1,HIF1A,AKT1,ITGB3,VEGFA,MYC |
| hsa04010 | MAPK signaling pathway | 57 | 288 | 0.83 | 5.33E-26 | MAPK1,TGFB1,NFKB1,MAPK14,FLT3,HSPB1,RAF1,PDGFRA,PDGFRB,MAP2K2,MAPK3,IL1A,IL1B,PRKCG,KDR,EGF,IGF1R,ERBB2,EGFR,NTRK2,CSF1R,KIT,BRAF,MAP2K1,INSR,FOS,PRKACA,TAOK2,CASP3,MET,FGFR3,MAPT,ERBB4,MAPK10,CACNA1S,PLA2G4A,JUN,TGFBR1,AKT2,TAOK3,PPP3CA,MAPK8,RASGRP3,IGF2,FGFR1,MAPK9,TNF,HRAS,PRKCA,FGFR2,NTRK1,RPS6KA1,MAPKAPK5,PGF,AKT1,VEGFA,MYC |
| hsa04066 | HIF-1 signaling pathway | 39 | 106 | 1.1 | 7.06E-26 | MAPK1,HMOX1,TIMP1,SERPINE1,RPS6KB1,NFKB1,IFNG,CREBBP,MAP2K2,MAPK3,EP300,PRKCG,PIK3CA,STAT3,EGF,IGF1R,ERBB2,EGFR,HK2,NOS3,MAP2K1,INSR,NOS2,MTOR,EGLN1,PGK1,TLR4,AKT2,CAMK2B,BCL2,IL6,HK1,PRKCA,SLC2A1,PIK3R1,HIF1A,LDHA,AKT1,VEGFA |
| hsa05160 | Hepatitis C | 44 | 156 | 0.99 | 2.65E-25 | MAPK1,NFKB1,CCND1,IFNG,EIF2AK2,RAF1,SCARB1,MAP2K2,MAPK3,PIK3CA,STAT3,EGF,CDK2,RB1,EGFR,BRAF,BAX,MAP2K1,CXCL10,YWHAG,EIF2AK3,CYCS,CASP3,GSK3B,TBK1,CASP9,JAK1,CTNNB1,E2F1,CASP8,STAT1,E2F2,AKT2,PPARA,TNF,HRAS,CLDN4,PIK3R1,TYK2,AKT1,LDLR,IKBKE,NR1H3,MYC |
| hsa05230 | Central carbon metabolism in cancer | 33 | 69 | 1.22 | 8.71E-25 | MAPK1,GCK,FLT3,RAF1,PDGFRA,PDGFRB,MAP2K2,MAPK3,PIK3CA,ERBB2,EGFR,KIT,HK2,MAP2K1,MET,SLC2A2,FGFR3,RET,MTOR,AKT2,G6PD,IDH1,FGFR1,HK1,HRAS,FGFR2,SLC2A1,PIK3R1,NTRK1,HIF1A,LDHA,AKT1,MYC |
| hsa01521 | EGFR tyrosine kinase inhibitor resistance | 34 | 78 | 1.18 | 1.58E-24 | MAPK1,RPS6KB1,RAF1,PDGFRA,PDGFRB,MAP2K2,MAPK3,PRKCG,KDR,PIK3CA,STAT3,EGF,IGF1R,ERBB2,EGFR,BRAF,BAX,MAP2K1,MET,GSK3B,FGFR3,JAK1,MTOR,SRC,JAK2,AKT2,BCL2,IL6,HRAS,PRKCA,FGFR2,PIK3R1,AKT1,VEGFA |
| hsa04919 | Thyroid hormone signaling pathway | 39 | 119 | 1.05 | 1.88E-24 | MAPK1,CCND1,BMP4,RAF1,MDM2,ITGAV,CREBBP,MAP2K2,MAPK3,EP300,PRKCG,KAT2B,PIK3CA,THRA,NCOR1,MAP2K1,PRKACA,GSK3B,CASP9,PDPK1,CTNNB1,STAT1,MTOR,HDAC1,SRC,AKT2,THRB,NCOA1,NCOA2,ESR1,HRAS,PRKCA,SLC2A1,PIK3R1,HDAC2,HIF1A,AKT1,ITGB3,MYC |
| hsa05418 | Fluid shear stress and atherosclerosis | 40 | 130 | 1.02 | 2.99E-24 | HMOX1,MMP2,PLAT,CCL2,NFKB1,IFNG,MAPK14,BMP4,ITGAV,IL1A,IL1B,KDR,PIK3CA,ICAM1,NCF1,VCAM1,NOS3,HSP90B1,FOS,GSTM1,NQO1,SELE,HSP90AA1,CAV1,CTNNB1,MAPK10,JUN,MMP9,SRC,THBD,AKT2,MAPK8,BCL2,GSTP1,MAPK9,TNF,PIK3R1,AKT1,ITGB3,VEGFA |
| hsa05166 | Human T-cell leukemia virus 1 infection | 46 | 211 | 0.87 | 1.51E-22 | MAPK1,TGFB1,NFKB1,IL2,CCND1,MMP7,CREBBP,MAP2K2,MAPK3,EP300,KAT2B,PIK3CA,ICAM1,CDK2,RB1,CCNA2,BAX,MAP2K1,FOS,TERT,PRKACA,LCK,ADCY2,JAK1,E2F1,ITGAL,MAPK10,E2F2,XIAP,JUN,TGFBR1,AKT2,PPP3CA,MAPK8,TSPO,ITGB2,IL6,CREB1,MAPK9,TNF,HRAS,SLC2A1,ADCY5,PIK3R1,AKT1,MYC |
| hsa05010 | Alzheimer disease | 57 | 355 | 0.74 | 3.46E-22 | MAPK1,XBP1,TUBB1,NFKB1,EIF2AK2,RAF1,CHRM3,ADAM10,MAP2K2,MAPK3,NOX4,IL1A,IL1B,PIK3CA,APP,BRAF,NCSTN,MAP2K1,INSR,GRM5,CHRM1,EIF2AK3,CYCS,ADAM17,CASP3,BACE1,GSK3B,PSEN1,NOS2,CASP9,BACE2,SNCA,MAPT,CTNNB1,CASP8,MAPK10,MTOR,CACNA1S,PSEN2,PTGS2,GRIN1,CHRM5,AKT2,PPP3CA,MAPK8,GRIN2A,IL6,MAPK9,TNF,HRAS,MME,CDK5,PIK3R1,CAPN1,AKT1,PSENEN,NOS1 |
| hsa04926 | Relaxin signaling pathway | 37 | 128 | 1 | 1.09E-21 | MAPK1,MMP2,TGFB1,COL1A1,NFKB1,MAPK14,RAF1,MMP13,MAP2K2,MAPK3,PIK3CA,EGFR,NOS3,MAP2K1,COL3A1,FOS,PRKACA,MMP1,NOS2,ADCY2,MAPK10,JUN,MMP9,SRC,TGFBR1,EDNRB,AKT2,MAPK8,CREB1,MAPK9,HRAS,PRKCA,ADCY5,PIK3R1,AKT1,NOS1,VEGFA |
| hsa04015 | Rap1 signaling pathway | 44 | 202 | 0.87 | 1.34E-21 | MAPK1,MAPK14,RAF1,PDGFRA,PDGFRB,MAP2K2,MAPK3,PRKCG,KDR,PIK3CA,EGF,IGF1R,EGFR,CSF1R,KIT,BRAF,MAP2K1,INSR,ADORA2B,MET,ADORA2A,FGFR3,ADCY2,CTNNB1,ITGAL,DRD2,CNR1,GRIN1,SRC,AKT2,GRIN2A,ITGB2,RASGRP3,FGFR1,HRAS,PRKCA,FGFR2,ADCY5,PIK3R1,PGF,AKT1,ITGB3,FPR1,VEGFA |
| hsa04014 | Ras signaling pathway | 46 | 226 | 0.85 | 1.50E-21 | MAPK1,NFKB1,FLT3,RAF1,PDGFRA,PDGFRB,MAP2K2,MAPK3,PRKCG,KDR,PIK3CA,EGF,IGF1R,EGFR,NTRK2,CSF1R,KIT,MAP2K1,INSR,PRKACA,MET,TBK1,HTR7,FGFR3,PTPN11,RASSF1,MAPK10,PLA2G4A,GRIN1,ABL1,AKT2,MAPK8,GRIN2A,PLA2G2A,RASGRP3,IGF2,FGFR1,MAPK9,HRAS,PRKCA,FGFR2,PIK3R1,NTRK1,PGF,AKT1,VEGFA |
| hsa05212 | Pancreatic cancer | 30 | 73 | 1.15 | 3.44E-21 | MAPK1,TGFB1,RPS6KB1,NFKB1,CCND1,RAF1,MAPK3,PIK3CA,STAT3,EGF,RB1,ERBB2,EGFR,BRAF,BAX,MAP2K1,CASP9,JAK1,E2F1,MAPK10,STAT1,MTOR,E2F2,TGFBR1,AKT2,MAPK8,MAPK9,PIK3R1,AKT1,VEGFA |
| hsa05210 | Colorectal cancer | 31 | 82 | 1.11 | 4.79E-21 | MAPK1,TGFB1,RPS6KB1,CCND1,RAF1,MAP2K2,MAPK3,PIK3CA,EGF,EGFR,BRAF,BAX,MAP2K1,FOS,CYCS,CASP3,GSK3B,CASP9,CTNNB1,MAPK10,MTOR,JUN,TGFBR1,AKT2,MAPK8,BCL2,MAPK9,HRAS,PIK3R1,AKT1,MYC |
| hsa04726 | Serotonergic synapse | 34 | 108 | 1.03 | 5.40E-21 | MAPK1,RAF1,HTR2B,CYP2C9,SLC6A4,MAPK3,PRKCG,GABRB2,HTR2C,APP,BRAF,HTR6,SLC18A2,MAP2K1,GABRB3,PRKACA,CASP3,HTR1A,HTR7,MAOA,PTGS1,CACNA1S,PLA2G4A,PTGS2,HTR1B,CYP2C19,ALOX5,HTR1D,MAOB,HRAS,PRKCA,ADCY5,HTR2A,ALOX15 |
| hsa05219 | Bladder cancer | 25 | 41 | 1.32 | 6.30E-21 | MAPK1,MMP2,CCND1,RAF1,MDM2,MAP2K2,MAPK3,EGF,RB1,ERBB2,EGFR,BRAF,MAP2K1,CXCL8,MMP1,FGFR3,E2F1,RASSF1,E2F2,MMP9,SRC,TYMP,HRAS,VEGFA,MYC |
| hsa05169 | Epstein-Barr virus infection | 42 | 193 | 0.87 | 1.08E-20 | NFKB1,CCND1,MAPK14,EIF2AK2,MDM2,PIK3CA,FCER2,STAT3,ICAM1,CDK2,RB1,CCNA2,BAX,CXCL10,CYCS,CASP3,TBK1,CASP9,JAK1,E2F1,ITGAL,CASP8,MAPK10,STAT1,E2F2,JUN,HDAC1,SYK,AKT2,MAPK8,BCL2,IL6,MAPK9,TNF,PIK3R1,LYN,HDAC2,TYK2,AKT1,IKBKE,MYC,BTK |
| hsa04068 | FoxO signaling pathway | 35 | 127 | 0.98 | 4.41E-20 | SIRT1,MAPK1,TGFB1,CCND1,MAPK14,CAT,RAF1,MDM2,CREBBP,MAP2K2,MAPK3,EP300,PIK3CA,STAT3,EGF,CDK2,IGF1R,EGFR,BRAF,MAP2K1,INSR,SLC2A4,PDPK1,MAPK10,GRM1,SGK1,TGFBR1,AKT2,MAPK8,IL6,MAPK9,HRAS,IL10,PIK3R1,AKT1 |
| hsa04072 | Phospholipase D signaling pathway | 37 | 147 | 0.94 | 4.41E-20 | MAPK1,RAF1,PDGFRA,PDGFRB,MAP2K2,MAPK3,PIK3CA,EGF,EGFR,KIT,CXCR1,AVPR1A,MAP2K1,INSR,GRM5,CXCL8,F2,CXCR2,PTPN11,ADCY2,AVPR2,PIK3CG,MTOR,GRM1,PLA2G4A,AGPAT2,SYK,AKT2,GRM2,HRAS,PRKCA,ADCY5,AGTR1,PIK3R1,GRM4,AKT1,PIP5K1C |
| hsa05152 | Tuberculosis | 39 | 168 | 0.9 | 4.41E-20 | MAPK1,TGFB1,NFKB1,IFNG,MAPK14,CTSD,RAF1,CREBBP,MAPK3,EP300,IL1A,IL1B,BAX,CYCS,CASP3,NOS2,CASP9,JAK1,CASP8,MAPK10,TLR9,STAT1,SRC,TLR4,SYK,JAK2,AKT2,PPP3CA,MAPK8,CAMK2B,ITGB2,BCL2,IL6,CREB1,MAPK9,TNF,IL10,VDR,AKT1 |
| hsa05223 | Non-small cell lung cancer | 28 | 68 | 1.15 | 6.50E-20 | MAPK1,CCND1,RAF1,MAP2K2,MAPK3,PRKCG,PIK3CA,STAT3,EGF,RB1,ERBB2,EGFR,BRAF,BAX,MAP2K1,MET,CASP9,RARB,PDPK1,E2F1,RASSF1,E2F2,ALK,AKT2,HRAS,PRKCA,PIK3R1,AKT1 |
| hsa04917 | Prolactin signaling pathway | 28 | 69 | 1.14 | 8.65E-20 | MAPK1,GCK,NFKB1,CCND1,MAPK14,IRF1,RAF1,MAP2K2,MAPK3,PIK3CA,STAT3,MAP2K1,FOS,SLC2A2,GSK3B,ESR2,MAPK10,STAT1,CYP17A1,SRC,JAK2,AKT2,MAPK8,MAPK9,ESR1,HRAS,PIK3R1,AKT1 |
| hsa04062 | Chemokine signaling pathway | 40 | 186 | 0.87 | 1.27E-19 | MAPK1,CCL2,NFKB1,RAF1,MAPK3,PIK3CA,STAT3,BRAF,NCF1,CCR2,CCR5,CXCR1,CCR1,MAP2K1,CXCL10,CXCL8,PRKACA,ADRBK1,CXCR2,GSK3B,CCR4,ADCY2,CCR9,PIK3CG,STAT1,SRC,CXCR3,FGR,JAK2,AKT2,PRKCD,CXCR4,ITK,HRAS,ADCY5,PIK3R1,LYN,GRK6,CCR3,AKT1 |
| hsa04510 | Focal adhesion | 41 | 198 | 0.85 | 1.35E-19 | MAPK1,COL1A1,CCND1,RAF1,PDGFRA,ITGAV,PDGFRB,MAPK3,PRKCG,KDR,PIK3CA,EGF,IGF1R,ERBB2,EGFR,BRAF,MAP2K1,MET,GSK3B,CAV1,PDPK1,CTNNB1,MAPK10,MYLK,XIAP,JUN,SRC,AKT2,SPP1,MAPK8,ITGA4,BCL2,MAPK9,HRAS,PRKCA,PIK3R1,PGF,AKT1,ITGB3,PIP5K1C,VEGFA |
| hsa05145 | Toxoplasmosis | 32 | 105 | 1.02 | 1.54E-19 | MAPK1,TGFB1,NFKB1,IFNG,MAPK14,MAPK3,STAT3,CCR5,CYCS,CASP3,NOS2,CASP9,JAK1,PDPK1,CASP8,PIK3CG,MAPK10,STAT1,CD40LG,XIAP,TLR4,ALOX5,JAK2,AKT2,MAPK8,BCL2,MAPK9,TNF,IL10,TYK2,AKT1,LDLR |
| hsa05235 | PD-L1 expression and PD-1 checkpoint pathway in cancer | 30 | 88 | 1.07 | 1.76E-19 | MAPK1,RPS6KB1,NFKB1,IFNG,MAPK14,RAF1,MAP2K2,MAPK3,PIK3CA,STAT3,EGF,EGFR,MAP2K1,FOS,LCK,PTPN11,JAK1,TLR9,STAT1,MTOR,JUN,TLR4,JAK2,ALK,AKT2,PPP3CA,HRAS,PIK3R1,HIF1A,AKT1 |
| hsa01100 | Metabolic pathways | 112 | 1447 | 0.43 | 1.82E-19 | CA12,HSD17B2,SIRT1,MIF,HMOX1,DHODH,GSR,GCK,CD38,LTA4H,ODC1,CAT,FOLH1,CYP2C9,ALDH2,ATP4A,TYR,PIK3CA,DNMT3A,PDE8B,MGLL,PNMT,PLA2G7,CA2,CA3,AKR1B1,HMGCR,HK2,CYP11B1,NOS3,TK2,ANPEP,CA4,GUSB,UGT2B7,ADH1B,CA5A,GSTM1,AOC3,CA5B,GBA,TYMS,HSD11B2,MPI,CA13,NQO1,CYP11B2,NOS2,PLB1,PDE4B,PDE2A,CYP3A4,MAOA,CYP1A2,ADCY2,IMPDH1,PDE4D,CA7,PDE5A,DHCR7,ARG1,PIK3CG,ENPP1,COMT,PTGS1,HSD11B1,PLA2G4A,PTGS2,PPOX,OAT,CA14,CYP17A1,CYP2C19,AGPAT2,AKR1A1,ADA,PGK1,GLO1,UGT1A1,ALOX5,ALPL,CA6,MAOB,CA9,XDH,CYP1A1,AKR1C4,AKR1C3,PDE4A,ASAH1,G6PD,TYMP,CYP19A1,ABAT,GSTP1,PLA2G2A,IDH1,DHFR,HK1,ALDH3A1,ADCY5,ADH1C,EPHX2,CA1,IDO1,PDE10A,LDHA,ALOX15,PIP5K1C,HSD17B1,NOS1,FDFT1 |
| hsa05165 | Human papillomavirus infection | 50 | 325 | 0.72 | 5.68E-19 | MAPK1,RPS6KB1,COL1A1,NFKB1,CCND1,EIF2AK2,IRF1,RAF1,MDM2,ITGAV,PDGFRB,CREBBP,MAP2K2,MAPK3,EP300,PIK3CA,EGF,CDK2,RB1,CCNA2,EGFR,BAX,MAP2K1,TERT,PRKACA,CASP3,GSK3B,PSEN1,TBK1,JAK1,CTNNB1,E2F1,CASP8,STAT1,MTOR,PTGS2,HDAC1,AKT2,SPP1,ITGA4,CREB1,TNF,HRAS,PIK3R1,HDAC2,TYK2,AKT1,ITGB3,IKBKE,VEGFA |
| hsa05164 | Influenza A | 37 | 165 | 0.89 | 9.51E-19 | MAPK1,CCL2,NFKB1,IFNG,EIF2AK2,RAF1,CREBBP,MAP2K2,MAPK3,EP300,IL1A,IL1B,PIK3CA,ICAM1,BAX,MAP2K1,CXCL10,CXCL8,CYCS,PRSS1,PLG,CASP3,TBK1,CASP9,JAK1,CASP8,STAT1,TLR4,JAK2,AKT2,IL6,TNF,PRKCA,PIK3R1,TYK2,AKT1,IKBKE |
| hsa04931 | Insulin resistance | 31 | 107 | 1 | 1.87E-18 | RPS6KB1,NFKB1,NR1H2,PIK3CA,STAT3,NOS3,INSR,PRKCE,SLC2A4,SLC2A2,GSK3B,PTPN11,PDPK1,SREBF1,MAPK10,PTPRF,MTOR,MGEA5,AKT2,PRKCD,MAPK8,PPARA,IL6,CREB1,MAPK9,TNF,SLC2A1,PIK3R1,RPS6KA1,AKT1,NR1H3 |
| hsa04012 | ErbB signaling pathway | 28 | 83 | 1.06 | 3.78E-18 | MAPK1,RPS6KB1,RAF1,MAP2K2,MAPK3,PRKCG,PIK3CA,EGF,ERBB2,EGFR,BRAF,MAP2K1,GSK3B,ERBB4,MAPK10,MTOR,JUN,ABL1,SRC,AKT2,MAPK8,CAMK2B,MAPK9,HRAS,PRKCA,PIK3R1,AKT1,MYC |
| hsa04659 | Th17 cell differentiation | 30 | 101 | 1.01 | 3.85E-18 | MAPK1,TGFB1,NFKB1,IL2,IFNG,MAPK14,IL4,AHR,RARA,RORA,MAPK3,IL1B,STAT3,STAT6,FOS,HSP90AA1,LCK,JAK1,MAPK10,STAT1,MTOR,JUN,TGFBR1,JAK2,PPP3CA,MAPK8,IL6,MAPK9,TYK2,HIF1A |
| hsa04625 | C-type lectin receptor signaling pathway | 30 | 102 | 1 | 4.75E-18 | MAPK1,NFKB1,IL2,MAPK14,IRF1,RAF1,MDM2,MAPK3,IL1B,PIK3CA,PTPN11,CASP8,MAPK10,STAT1,PTGS2,JUN,SRC,SYK,AKT2,PRKCD,PPP3CA,MAPK8,IL6,MAPK9,TNF,HRAS,IL10,PIK3R1,AKT1,IKBKE |
| hsa04380 | Osteoclast differentiation | 32 | 122 | 0.96 | 5.37E-18 | MAPK1,TGFB1,NFKB1,IFNG,MAPK14,MAPK3,IL1A,IL1B,PIK3CA,CSF1R,PPARG,NCF1,MAP2K1,FOS,LCK,JAK1,MAPK10,STAT1,JUN,TGFBR1,SYK,AKT2,PPP3CA,MAPK8,CREB1,MAPK9,TNF,PIK3R1,TYK2,AKT1,ITGB3,BTK |
| hsa04915 | Estrogen signaling pathway | 33 | 133 | 0.93 | 6.18E-18 | MAPK1,MMP2,CTSD,RAF1,RARA,MAP2K2,MAPK3,PIK3CA,EGFR,NOS3,HSP90B1,MAP2K1,FOS,PRKACA,HSP90AA1,ADCY2,ESR2,GRM1,JUN,MMP9,SRC,AKT2,PRKCD,BCL2,NCOA1,CREB1,OPRM1,NCOA2,ESR1,HRAS,ADCY5,PIK3R1,AKT1 |
| hsa05226 | Gastric cancer | 34 | 144 | 0.91 | 6.62E-18 | MAPK1,TGFB1,RPS6KB1,CCND1,RAF1,MAP2K2,MAPK3,PIK3CA,EGF,CDK2,RB1,ERBB2,EGFR,BRAF,BAX,SHH,MAP2K1,TERT,MET,GSK3B,RARB,CTNNB1,E2F1,MTOR,E2F2,TGFBR1,AKT2,BCL2,HRAS,FGFR2,PIK3R1,AKT1,ABCB1,MYC |
| hsa05162 | Measles | 33 | 138 | 0.92 | 1.54E-17 | NFKB1,IL2,CCND1,EIF2AK2,IL1A,IL1B,PIK3CA,STAT3,CDK2,BAX,FOS,EIF2AK3,CYCS,CASP3,GSK3B,TBK1,CASP9,JAK1,CASP8,MAPK10,TLR9,STAT1,JUN,TLR4,AKT2,MAPK8,BCL2,IL6,MAPK9,PIK3R1,TYK2,AKT1,IKBKE |
| hsa05214 | Glioma | 26 | 72 | 1.09 | 1.56E-17 | MAPK1,CCND1,RAF1,PDGFRA,MDM2,PDGFRB,MAP2K2,MAPK3,PRKCG,PIK3CA,EGF,RB1,IGF1R,EGFR,BRAF,BAX,MAP2K1,E2F1,MTOR,E2F2,AKT2,CAMK2B,HRAS,PRKCA,PIK3R1,AKT1 |
| hsa05225 | Hepatocellular carcinoma | 35 | 160 | 0.88 | 1.56E-17 | MAPK1,HMOX1,TGFB1,RPS6KB1,CCND1,RAF1,MAP2K2,MAPK3,PRKCG,PIK3CA,SMARCA2,RB1,IGF1R,EGFR,BRAF,BAX,MAP2K1,TERT,GSTM1,MET,NQO1,GSK3B,CTNNB1,E2F1,MTOR,E2F2,TGFBR1,AKT2,GSTP1,IGF2,HRAS,PRKCA,PIK3R1,AKT1,MYC |
| hsa04935 | Growth hormone synthesis, secretion and action | 31 | 118 | 0.96 | 1.64E-17 | MAPK1,MAPK14,RAF1,CREBBP,MAP2K2,MAPK3,EP300,PRKCG,PIK3CA,STAT3,MAP2K1,FOS,PRKACA,GSK3B,ADCY2,SSTR2,MAPK10,STAT1,MTOR,CACNA1S,IGFBP3,JAK2,AKT2,MAPK8,CREB1,MAPK9,HRAS,PRKCA,ADCY5,PIK3R1,AKT1 |
| hsa05142 | Chagas disease | 29 | 99 | 1 | 1.74E-17 | MAPK1,TGFB1,SERPINE1,CCL2,NFKB1,IL2,IFNG,MAPK14,MAPK3,IL1B,PIK3CA,ACE,FOS,CXCL8,NOS2,CASP8,MAPK10,TLR9,JUN,TLR4,TGFBR1,AKT2,MAPK8,IL6,MAPK9,TNF,IL10,PIK3R1,AKT1 |
| hsa04657 | IL-17 signaling pathway | 28 | 92 | 1.02 | 2.87E-17 | MAPK1,CCL2,NFKB1,IFNG,MAPK14,IL4,MMP13,MAPK3,IL1B,HSP90B1,CXCL10,FOS,CXCL8,CASP3,MMP1,GSK3B,TBK1,HSP90AA1,CASP8,MAPK10,PTGS2,JUN,MMP9,MAPK8,IL6,MAPK9,TNF,IKBKE |
| hsa04722 | Neurotrophin signaling pathway | 30 | 114 | 0.96 | 5.34E-17 | MAPK1,NFKB1,MAPK14,RAF1,MAP2K2,MAPK3,PIK3CA,NTRK2,BRAF,BAX,MAP2K1,GSK3B,PSEN1,PTPN11,PDPK1,MAPK10,PSEN2,JUN,ABL1,AKT2,PRKCD,MAPK8,CAMK2B,BCL2,MAPK9,HRAS,PIK3R1,NTRK1,RPS6KA1,AKT1 |
| hsa05135 | Yersinia infection | 31 | 125 | 0.93 | 6.19E-17 | MAPK1,CCL2,NFKB1,IL2,MAPK14,MAP2K2,MAPK3,IL1B,PIK3CA,MAP2K1,FOS,CXCL8,GSK3B,TBK1,LIMK1,LCK,MAPK10,JUN,SRC,TLR4,AKT2,MAPK8,ITGA4,IL6,MAPK9,TNF,IL10,PIK3R1,RPS6KA1,AKT1,PIP5K1C |
| hsa04725 | Cholinergic synapse | 29 | 110 | 0.96 | 1.77E-16 | MAPK1,CHRM3,CHRNB4,MAPK3,PRKCG,PIK3CA,MAP2K1,ACHE,FOS,CHRM1,PRKACA,CHRNA3,ADCY2,PIK3CG,CACNA1S,CHRNB2,CHRNA4,JAK2,CHRM5,AKT2,CAMK2B,BCL2,CREB1,CHRM2,HRAS,PRKCA,ADCY5,PIK3R1,AKT1 |
| hsa04660 | T cell receptor signaling pathway | 28 | 101 | 0.98 | 2.07E-16 | MAPK1,NFKB1,IL2,IFNG,MAPK14,IL4,RAF1,MAP2K2,MAPK3,PIK3CA,MAP2K1,FOS,GSK3B,LCK,PDPK1,MAPK10,CD40LG,JUN,AKT2,PPP3CA,MAPK8,MAPK9,ITK,TNF,HRAS,IL10,PIK3R1,AKT1 |
| hsa04210 | Apoptosis | 31 | 132 | 0.91 | 2.21E-16 | MAPK1,NFKB1,CTSD,RAF1,MAP2K2,MAPK3,PIK3CA,BAX,MAP2K1,FOS,EIF2AK3,CYCS,CASP3,CASP9,PDPK1,CASP8,MAPK10,PARP1,XIAP,JUN,AKT2,MAPK8,BCL2,MAPK9,PRF1,TNF,HRAS,PIK3R1,NTRK1,CAPN1,AKT1 |
| hsa04664 | Fc epsilon RI signaling pathway | 24 | 66 | 1.1 | 2.40E-16 | MAPK1,MAPK14,IL4,RAF1,MAP2K2,MAPK3,PIK3CA,MAP2K1,PDPK1,MAPK10,PLA2G4A,ALOX5,SYK,AKT2,MAPK8,MAPK9,TNF,HRAS,PRKCA,PIK3R1,LYN,AKT1,ALOX5AP,BTK |
| hsa05221 | Acute myeloid leukemia | 24 | 66 | 1.1 | 2.40E-16 | MAPK1,MPO,RPS6KB1,NFKB1,CCND1,FLT3,RAF1,RARA,MAP2K2,MAPK3,PIK3CA,STAT3,CCNA2,CSF1R,KIT,BRAF,MAP2K1,MTOR,AKT2,RUNX1T1,HRAS,PIK3R1,AKT1,MYC |
| hsa05220 | Chronic myeloid leukemia | 25 | 75 | 1.06 | 2.74E-16 | MAPK1,TGFB1,NFKB1,CCND1,RAF1,MDM2,MAP2K2,MAPK3,PIK3CA,RB1,BRAF,BAX,MAP2K1,PTPN11,E2F1,E2F2,ABL1,HDAC1,TGFBR1,AKT2,HRAS,PIK3R1,HDAC2,AKT1,MYC |
| hsa05224 | Breast cancer | 32 | 145 | 0.88 | 2.99E-16 | MAPK1,RPS6KB1,CCND1,RAF1,MAP2K2,MAPK3,PIK3CA,EGF,RB1,IGF1R,ERBB2,EGFR,KIT,BRAF,BAX,MAP2K1,FOS,GSK3B,ESR2,CTNNB1,E2F1,MTOR,E2F2,JUN,AKT2,NCOA1,FGFR1,ESR1,HRAS,PIK3R1,AKT1,MYC |
| hsa05203 | Viral carcinogenesis | 35 | 182 | 0.82 | 4.10E-16 | MAPK1,NFKB1,CCND1,EIF2AK2,MDM2,CREBBP,MAPK3,EP300,KAT2B,PIK3CA,HDAC4,STAT3,CDK2,RB1,CCNA2,CCR5,BAX,YWHAG,PRKACA,CASP3,CCR4,JAK1,CASP8,JUN,HDAC1,HDAC8,SRC,SYK,CREB1,HRAS,HDAC9,PIK3R1,LYN,HDAC2,CCR3 |
| hsa05231 | Choline metabolism in cancer | 27 | 96 | 0.99 | 5.09E-16 | MAPK1,RPS6KB1,RAF1,PDGFRA,PDGFRB,MAP2K2,MAPK3,PRKCG,PIK3CA,EGF,EGFR,MAP2K1,FOS,PDPK1,MAPK10,MTOR,PLA2G4A,JUN,AKT2,MAPK8,MAPK9,HRAS,PRKCA,PIK3R1,HIF1A,AKT1,PIP5K1C |
| hsa04022 | cGMP-PKG signaling pathway | 33 | 162 | 0.85 | 7.19E-16 | MAPK1,OPRD1,RAF1,MAP2K2,MAPK3,ADRA2A,NOS3,MAP2K1,INSR,ADRB2,PRKCE,ADRA1B,EDNRA,PDE2A,ADCY2,ADRB3,PDE5A,PIK3CG,MYLK,CACNA1S,ADORA1,ADRB1,EDNRB,ADRA1D,ADRA1A,AKT2,PPP3CA,ADRA2C,CREB1,ADCY5,AGTR1,AKT1,ADRA2B |
| hsa05218 | Melanoma | 24 | 72 | 1.06 | 1.09E-15 | MAPK1,CCND1,RAF1,PDGFRA,MDM2,PDGFRB,MAP2K2,MAPK3,PIK3CA,EGF,RB1,IGF1R,EGFR,BRAF,BAX,MAP2K1,MET,E2F1,E2F2,AKT2,FGFR1,HRAS,PIK3R1,AKT1 |
| hsa04620 | Toll-like receptor signaling pathway | 27 | 101 | 0.96 | 1.43E-15 | MAPK1,NFKB1,MAPK14,MAP2K2,MAPK3,IL1B,PIK3CA,MAP2K1,CXCL10,FOS,CXCL8,TBK1,CASP8,MAPK10,TLR9,STAT1,JUN,TLR4,AKT2,SPP1,MAPK8,IL6,MAPK9,TNF,PIK3R1,AKT1,IKBKE |
| hsa04370 | VEGF signaling pathway | 22 | 57 | 1.12 | 1.60E-15 | MAPK1,MAPK14,HSPB1,RAF1,MAP2K2,MAPK3,PRKCG,KDR,PIK3CA,NOS3,MAP2K1,CASP9,PLA2G4A,PTGS2,SRC,AKT2,PPP3CA,HRAS,PRKCA,PIK3R1,AKT1,VEGFA |
| hsa04668 | TNF signaling pathway | 28 | 112 | 0.93 | 1.66E-15 | MAPK1,CCL2,NFKB1,MAPK14,IRF1,MAPK3,IL1B,PIK3CA,ICAM1,VCAM1,MAP2K1,CXCL10,FOS,CASP3,SELE,CASP8,MAPK10,PTGS2,JUN,MMP9,AKT2,MAPK8,IL6,CREB1,MAPK9,TNF,PIK3R1,AKT1 |
| hsa04071 | Sphingolipid signaling pathway | 28 | 116 | 0.92 | 3.54E-15 | MAPK1,NFKB1,MAPK14,OPRD1,CTSD,RAF1,MAP2K2,MAPK3,PRKCG,PIK3CA,BAX,NOS3,MAP2K1,PRKCE,PDPK1,MAPK10,ADORA1,ASAH1,AKT2,MAPK8,BCL2,ABCC1,MAPK9,TNF,HRAS,PRKCA,PIK3R1,AKT1 |
| hsa04218 | Cellular senescence | 31 | 150 | 0.85 | 4.01E-15 | SIRT1,MAPK1,TGFB1,SERPINE1,NFKB1,CCND1,MAPK14,RAF1,MDM2,MAP2K2,MAPK3,IL1A,PIK3CA,CDK2,RB1,CCNA2,MAP2K1,CXCL8,E2F1,MTOR,E2F2,TGFBR1,IGFBP3,AKT2,PPP3CA,IL6,HRAS,PIK3R1,CAPN1,AKT1,MYC |
| hsa04540 | Gap junction | 25 | 87 | 0.99 | 4.23E-15 | MAPK1,TUBB1,RAF1,PDGFRA,HTR2B,PDGFRB,MAP2K2,MAPK3,PRKCG,EGF,EGFR,HTR2C,MAP2K1,GRM5,PRKACA,ADCY2,DRD2,GRM1,ADRB1,SRC,DRD1,HRAS,PRKCA,ADCY5,HTR2A |
| hsa05170 | Human immunodeficiency virus 1 infection | 35 | 204 | 0.77 | 7.76E-15 | MAPK1,RPS6KB1,NFKB1,MAPK14,RAF1,MAP2K2,MAPK3,PRKCG,PIK3CA,CCR5,BAX,MAP2K1,FOS,CYCS,CASP3,TBK1,CASP9,LIMK1,LIMK2,CASP8,MAPK10,MTOR,JUN,TLR4,AKT2,PPP3CA,MAPK8,BCL2,CXCR4,MAPK9,TNF,HRAS,PRKCA,PIK3R1,AKT1 |
| hsa05213 | Endometrial cancer | 21 | 57 | 1.1 | 1.51E-14 | MAPK1,CCND1,RAF1,MAP2K2,MAPK3,PIK3CA,EGF,ERBB2,EGFR,BRAF,BAX,MAP2K1,GSK3B,CASP9,PDPK1,CTNNB1,AKT2,HRAS,PIK3R1,AKT1,MYC |
| hsa04750 | Inflammatory mediator regulation of TRP channels | 25 | 94 | 0.96 | 1.85E-14 | MAPK14,PTGER2,HTR2B,TRPA1,IL1B,PRKCG,PIK3CA,HTR2C,PRKCE,PRKACA,TRPM8,ADCY2,MAPK10,PLA2G4A,SRC,PRKCD,MAPK8,CAMK2B,MAPK9,PRKCA,ADCY5,PIK3R1,NTRK1,HTR2A,TRPV1 |
| hsa00140 | Steroid hormone biosynthesis | 21 | 59 | 1.09 | 2.58E-14 | HSD17B2,STS,SRD5A1,CYP11B1,UGT2B7,HSD11B2,CYP11B2,CYP3A4,CYP1A2,COMT,HSD11B1,CYP17A1,UGT1A1,CYP1A1,AKR1C4,AKR1C3,AKR1C1,CYP19A1,HSD17B1,SRD5A2,CYP1B1 |
| hsa04728 | Dopaminergic synapse | 28 | 128 | 0.88 | 2.79E-14 | DRD4,MAPK14,PRKCG,SLC6A3,GRIA2,SLC18A2,DRD5,FOS,PRKACA,GSK3B,MAOA,MAPK10,COMT,DRD2,MAOB,DRD3,AKT2,DRD1,PPP3CA,MAPK8,CAMK2B,GRIN2A,CREB1,MAPK9,PRKCA,ADCY5,GRIA1,AKT1 |
| hsa05140 | Leishmaniasis | 22 | 70 | 1.03 | 4.68E-14 | MAPK1,TGFB1,NFKB1,IFNG,MAPK14,IL4,MAPK3,IL1A,IL1B,NCF1,FOS,NOS2,JAK1,STAT1,PTGS2,JUN,TLR4,JAK2,ITGA4,ITGB2,TNF,IL10 |
| hsa04910 | Insulin signaling pathway | 28 | 133 | 0.86 | 6.28E-14 | MAPK1,GCK,RPS6KB1,LIPE,RAF1,MAP2K2,MAPK3,PIK3CA,BRAF,HK2,MAP2K1,INSR,PRKACA,SLC2A4,GSK3B,PDPK1,SREBF1,MAPK10,PTPRF,MTOR,AKT2,MAPK8,MAPK9,HK1,HRAS,PIK3R1,AKT1,PHKG2 |
| hsa04720 | Long-term potentiation | 21 | 64 | 1.05 | 9.24E-14 | MAPK1,RAF1,CREBBP,MAP2K2,MAPK3,EP300,PRKCG,BRAF,GRIA2,MAP2K1,GRM5,PRKACA,GRM1,GRIN1,PPP3CA,CAMK2B,GRIN2A,HRAS,PRKCA,GRIA1,RPS6KA1 |
| hsa05031 | Amphetamine addiction | 21 | 66 | 1.04 | 1.51E-13 | SIRT1,PRKCG,SLC6A3,GRIA2,SLC18A2,FOS,PRKACA,MAOA,JUN,GRIN1,HDAC1,MAOB,DRD1,PPP3CA,CAMK2B,GRIN2A,CREB1,PRKCA,ADCY5,GRIA1,HDAC2 |
| hsa05211 | Renal cell carcinoma | 21 | 66 | 1.04 | 1.51E-13 | MAPK1,TGFB1,RAF1,CREBBP,MAP2K2,MAPK3,EP300,PIK3CA,BRAF,MAP2K1,MET,PTPN11,EGLN1,JUN,AKT2,HRAS,SLC2A1,PIK3R1,HIF1A,AKT1,VEGFA |
| hsa04371 | Apelin signaling pathway | 27 | 131 | 0.85 | 2.81E-13 | MAPK1,PLAT,SERPINE1,RPS6KB1,CCND1,LIPE,RAF1,MAP2K2,MAPK3,HDAC4,NOS3,MAP2K1,PRKCE,PRKACA,NOS2,ADCY2,PIK3CG,MYLK,MTOR,TGFBR1,AKT2,SPP1,HRAS,ADCY5,AGTR1,AKT1,NOS1 |
| hsa04912 | GnRH signaling pathway | 23 | 89 | 0.95 | 3.59E-13 | MAPK1,MMP2,GNRHR,MAPK14,RAF1,MAP2K2,MAPK3,EGFR,MAP2K1,PRKACA,ADCY2,MAPK10,CACNA1S,PLA2G4A,JUN,SRC,PRKCD,MAPK8,CAMK2B,MAPK9,HRAS,PRKCA,ADCY5 |
| hsa05032 | Morphine addiction | 23 | 89 | 0.95 | 3.59E-13 | PRKCG,PDE8B,GABRA6,GABRB2,GABRB3,PRKACA,ADRBK1,PDE4B,PDE2A,GABRA5,ADCY2,PDE4D,ADORA1,GABRA3,PDE4A,DRD1,GABRA1,OPRM1,PRKCA,ADCY5,GABRA2,GRK6,PDE10A |
| hsa04270 | Vascular smooth muscle contraction | 27 | 133 | 0.84 | 3.73E-13 | MAPK1,RAF1,MAP2K2,MAPK3,PRKCG,BRAF,AVPR1A,MAP2K1,ADORA2B,PRKCE,ADRA1B,PRKACA,EDNRA,CALCA,ADORA2A,ADCY2,MYLK,CACNA1S,PLA2G4A,ADRA1D,ADRA1A,PRKCD,PLA2G2A,CALCRL,PRKCA,ADCY5,AGTR1 |
| hsa04630 | JAK-STAT signaling pathway | 29 | 160 | 0.79 | 5.52E-13 | IL2,CCND1,IFNG,IL4,RAF1,PDGFRA,PDGFRB,CREBBP,EP300,PIK3CA,STAT3,EGF,EGFR,STAT6,PTPN2,PTPN11,JAK1,STAT1,MTOR,JAK2,AKT2,BCL2,IL6,HRAS,IL10,PIK3R1,TYK2,AKT1,MYC |
| hsa04930 | Type II diabetes mellitus | 18 | 46 | 1.13 | 5.52E-13 | MAPK1,GCK,MAPK3,PIK3CA,HK2,INSR,PRKCE,SLC2A4,SLC2A2,MAPK10,MTOR,PRKCD,MAPK8,ADIPOQ,MAPK9,TNF,HK1,PIK3R1 |
| hsa04932 | Non-alcoholic fatty liver disease | 28 | 148 | 0.81 | 5.71E-13 | XBP1,TGFB1,NFKB1,IL1A,IL1B,PIK3CA,BAX,INSR,FOS,CXCL8,EIF2AK3,CYCS,CASP3,GSK3B,SREBF1,CASP8,MAPK10,JUN,AKT2,MAPK8,PPARA,IL6,ADIPOQ,MAPK9,TNF,PIK3R1,AKT1,NR1H3 |
| hsa04934 | Cushing syndrome | 28 | 153 | 0.8 | 1.16E-12 | MAPK1,CCND1,AHR,SCARB1,MAP2K2,MAPK3,PDE8B,CDK2,RB1,EGFR,BRAF,CYP11B1,MAP2K1,PRKACA,GSK3B,ADCY2,CTNNB1,E2F1,WDR5,CACNA1S,E2F2,CYP17A1,CAMK2B,CRHR1,CREB1,ADCY5,AGTR1,LDLR |
| hsa04810 | Regulation of actin cytoskeleton | 32 | 209 | 0.72 | 1.71E-12 | MAPK1,RAF1,CHRM3,PDGFRA,ITGAV,PDGFRB,MAP2K2,MAPK3,PIK3CA,EGF,EGFR,BRAF,MAP2K1,CHRM1,F2,LIMK1,FGFR3,LIMK2,ITGAL,MYLK,SRC,CHRM5,ITGA4,ITGB2,CXCR4,FGFR1,CHRM2,HRAS,FGFR2,PIK3R1,ITGB3,PIP5K1C |
| hsa05132 | Salmonella infection | 32 | 209 | 0.72 | 1.71E-12 | MAPK1,NFKB1,MAPK14,RAF1,MAP2K2,MAPK3,IL1B,PIK3CA,BAX,HSP90B1,MAP2K1,FOS,CXCL8,CYCS,CASP3,HSP90AA1,CTNNB1,CASP8,PIK3CG,MAPK10,TLR9,JUN,TLR4,AKT2,MAPK8,BCL2,IL6,MAPK9,TNF,HRAS,AKT1,MYC |
| hsa04723 | Retrograde endocannabinoid signaling | 27 | 145 | 0.81 | 2.10E-12 | MAPK1,MAPK14,FAAH,MAPK3,PRKCG,MGLL,GABRA6,GABRB2,GRIA2,GRM5,GABRB3,PRKACA,GABRA5,ADCY2,MAPK10,GRM1,CACNA1S,PTGS2,CNR1,GABRA3,MAPK8,GABRA1,MAPK9,PRKCA,ADCY5,GABRA2,GRIA1 |
| hsa04923 | Regulation of lipolysis in adipocytes | 18 | 54 | 1.06 | 4.81E-12 | LIPE,FABP4,PIK3CA,MGLL,INSR,ADRB2,PRKACA,ADCY2,ADRB3,PTGER3,PTGS1,ADORA1,PTGS2,ADRB1,AKT2,ADCY5,PIK3R1,AKT1 |
| hsa05144 | Malaria | 17 | 46 | 1.1 | 5.24E-12 | TGFB1,CCL2,IFNG,IL1B,ICAM1,VCAM1,CXCL8,MET,SELE,ITGAL,TLR9,CD40LG,TLR4,ITGB2,IL6,TNF,IL10 |
| hsa04914 | Progesterone-mediated oocyte maturation | 22 | 94 | 0.91 | 6.10E-12 | MAPK1,AURKA,MAPK14,RAF1,MAPK3,PIK3CA,CDK2,IGF1R,CCNA2,BRAF,MAP2K1,PRKACA,HSP90AA1,ADCY2,MAPK10,AKT2,MAPK8,MAPK9,ADCY5,PIK3R1,RPS6KA1,AKT1 |
| hsa05133 | Pertussis | 20 | 74 | 0.97 | 6.71E-12 | MAPK1,NFKB1,MAPK14,IRF1,MAPK3,IL1A,IL1B,FOS,CXCL8,CASP3,NOS2,MAPK10,JUN,TLR4,MAPK8,ITGB2,IL6,MAPK9,TNF,IL10 |
| hsa04611 | Platelet activation | 24 | 122 | 0.83 | 1.46E-11 | MAPK1,COL1A1,MAPK14,MAPK3,PIK3CA,NOS3,COL3A1,F2,PRKACA,ADCY2,PIK3CG,MYLK,PTGS1,PLA2G4A,SRC,SYK,AKT2,TBXA2R,ADCY5,PIK3R1,LYN,AKT1,ITGB3,BTK |
| hsa04913 | Ovarian steroidogenesis | 17 | 50 | 1.07 | 1.51E-11 | HSD17B2,SCARB1,IGF1R,INSR,PRKACA,ADCY2,PLA2G4A,PTGS2,CYP17A1,ALOX5,CYP1A1,AKR1C3,CYP19A1,ADCY5,LDLR,HSD17B1,CYP1B1 |
| hsa05146 | Amoebiasis | 22 | 100 | 0.88 | 1.70E-11 | CTSG,TGFB1,COL1A1,NFKB1,IFNG,HSPB1,IL1B,PRKCG,PIK3CA,COL3A1,CXCL8,PRKACA,CASP3,NOS2,ARG1,TLR4,ITGB2,IL6,TNF,PRKCA,IL10,PIK3R1 |
| hsa04921 | Oxytocin signaling pathway | 26 | 149 | 0.78 | 1.94E-11 | MAPK1,CD38,CCND1,RAF1,MAP2K2,MAPK3,PRKCG,EGFR,NOS3,MAP2K1,FOS,PRKACA,OXTR,ADCY2,PIK3CG,MYLK,CACNA1S,PLA2G4A,PTGS2,JUN,SRC,PPP3CA,CAMK2B,HRAS,PRKCA,ADCY5 |
| hsa05131 | Shigellosis | 31 | 218 | 0.69 | 2.01E-11 | MAPK1,RPS6KB1,NFKB1,MAPK14,MDM2,MAPK3,IL1B,PIK3CA,EGFR,HK2,BAX,PRKCE,CXCL8,CYCS,GSK3B,TBK1,MAPK10,MTOR,JUN,SRC,TLR4,AKT2,PRKCD,MAPK8,BCL2,MAPK9,TNF,HK1,PIK3R1,CAPN1,AKT1 |
| hsa01524 | Platinum drug resistance | 19 | 70 | 0.97 | 2.16E-11 | MAPK1,MDM2,MAPK3,PIK3CA,ERBB2,BAX,CYCS,CASP3,GSTM1,CASP9,PDPK1,CASP8,XIAP,AKT2,BCL2,GSTP1,TOP2B,PIK3R1,AKT1 |
| hsa04928 | Parathyroid hormone synthesis, secretion and action | 22 | 103 | 0.87 | 2.71E-11 | MAPK1,RAF1,MMP13,MAPK3,PRKCG,EGFR,BRAF,MAP2K1,FOS,PRKACA,PDE4B,ADCY2,PDE4D,RUNX2,PDE4A,BCL2,CREB1,FGFR1,PRKCA,ADCY5,CASR,VDR |
| hsa05222 | Small cell lung cancer | 21 | 92 | 0.89 | 2.74E-11 | NFKB1,CCND1,ITGAV,PIK3CA,CDK2,RB1,BAX,CYCS,CASP3,NOS2,CASP9,RARB,E2F1,E2F2,PTGS2,XIAP,AKT2,BCL2,PIK3R1,AKT1,MYC |
| hsa00910 | Nitrogen metabolism | 12 | 17 | 1.39 | 3.25E-11 | CA12,CA2,CA3,CA4,CA5A,CA5B,CA13,CA7,CA14,CA6,CA9,CA1 |
| hsa04140 | Autophagy - animal | 24 | 130 | 0.8 | 4.35E-11 | MAPK1,RPS6KB1,CTSD,RAF1,MAP2K2,MAPK3,PIK3CA,IGF1R,MAP2K1,EIF2AK3,PRKACA,TBK1,PDPK1,MAPK10,MTOR,AKT2,PRKCD,MAPK8,BCL2,MAPK9,HRAS,PIK3R1,HIF1A,AKT1 |
| hsa05034 | Alcoholism | 25 | 144 | 0.78 | 5.19E-11 | MAPK1,RAF1,MAPK3,HDAC4,SLC6A3,NTRK2,BRAF,SLC18A2,MAP2K1,ADORA2B,PRKACA,ADORA2A,MAOA,DRD2,GRIN1,HDAC1,HDAC8,MAOB,DRD1,GRIN2A,CREB1,HRAS,HDAC9,ADCY5,HDAC2 |
| hsa05120 | Epithelial cell signaling in Helicobacter pylori infection | 18 | 67 | 0.97 | 8.61E-11 | CSK,NFKB1,MAPK14,ADAM10,EGFR,CXCR1,CXCL8,ADAM17,CASP3,MET,CXCR2,PTPN11,MAPK10,JUN,SRC,MAPK8,MAPK9,LYN |
| hsa04217 | Necroptosis | 25 | 149 | 0.76 | 9.80E-11 | IFNG,EIF2AK2,IL1A,IL1B,STAT3,BAX,STAT6,HSP90AA1,JAK1,CASP8,MAPK10,STAT1,PARP1,PLA2G4A,XIAP,TLR4,JAK2,MAPK8,CAMK2B,BCL2,MAPK9,TNF,TYK2,CAPN1,ALOX15 |
| hsa05030 | Cocaine addiction | 16 | 49 | 1.05 | 9.80E-11 | NFKB1,SLC6A3,GRIA2,SLC18A2,PRKACA,MAOA,DRD2,JUN,GRIN1,MAOB,DRD1,GRM2,GRIN2A,CREB1,ADCY5,CDK5 |
| hsa04662 | B cell receptor signaling pathway | 19 | 78 | 0.92 | 9.94E-11 | MAPK1,NFKB1,RAF1,MAP2K2,MAPK3,PIK3CA,MAP2K1,FOS,GSK3B,JUN,SYK,AKT2,PPP3CA,RASGRP3,HRAS,PIK3R1,LYN,AKT1,BTK |
| hsa04730 | Long-term depression | 17 | 59 | 1 | 1.19E-10 | MAPK1,RAF1,MAP2K2,MAPK3,PRKCG,IGF1R,BRAF,GRIA2,MAP2K1,GRM1,PLA2G4A,CRHR1,HRAS,PRKCA,LYN,GRIA1,NOS1 |
| hsa04666 | Fc gamma R-mediated phagocytosis | 20 | 90 | 0.88 | 1.22E-10 | MAPK1,RPS6KB1,RAF1,MAPK3,PRKCG,PIK3CA,NCF1,MAP2K1,PRKCE,LIMK1,LIMK2,PLA2G4A,SYK,AKT2,PRKCD,PRKCA,PIK3R1,LYN,AKT1,PIP5K1C |
| hsa04213 | Longevity regulating pathway - multiple species | 17 | 61 | 0.98 | 1.82E-10 | SIRT1,RPS6KB1,CAT,PIK3CA,IGF1R,SOD1,INSR,PRKACA,ADCY2,MTOR,HDAC1,AKT2,HRAS,ADCY5,PIK3R1,HDAC2,AKT1 |
| hsa04916 | Melanogenesis | 20 | 95 | 0.86 | 2.77E-10 | MAPK1,RAF1,CREBBP,MAP2K2,MAPK3,EP300,TYR,PRKCG,KIT,MAP2K1,PRKACA,GSK3B,ADCY2,CTNNB1,EDNRB,CAMK2B,CREB1,HRAS,PRKCA,ADCY5 |
| hsa04929 | GnRH secretion | 17 | 63 | 0.97 | 2.77E-10 | MAPK1,KISS1R,RAF1,MAP2K2,MAPK3,PRKCG,PIK3CA,MAP2K1,ESR2,CACNA1S,AKT2,SPP1,HRAS,PRKCA,PIK3R1,AKT1,KCNN3 |
| hsa04621 | NOD-like receptor signaling pathway | 26 | 174 | 0.71 | 3.58E-10 | MAPK1,CCL2,NFKB1,MAPK14,MAPK3,IL1B,CXCL8,TBK1,P2RX7,HSP90AA1,JAK1,CASP8,MAPK10,STAT1,XIAP,JUN,TLR4,PRKCD,MAPK8,BCL2,IL6,MAPK9,TNF,CASR,TYK2,IKBKE |
| hsa04650 | Natural killer cell mediated cytotoxicity | 22 | 121 | 0.8 | 3.70E-10 | MAPK1,IFNG,RAF1,MAP2K2,MAPK3,PRKCG,PIK3CA,ICAM1,BRAF,MAP2K1,CASP3,LCK,PTPN11,ITGAL,SYK,PPP3CA,ITGB2,PRF1,TNF,HRAS,PRKCA,PIK3R1 |
| hsa04261 | Adrenergic signaling in cardiomyocytes | 24 | 147 | 0.75 | 3.73E-10 | MAPK1,MAPK14,TNNC1,MAPK3,ADRB2,ADRA1B,PRKACA,TNNI3,ADCY2,PIK3CG,CACNA1S,ADRB1,AGTR2,ADRA1D,ADRA1A,AKT2,CAMK2B,BCL2,CREB1,PRKCA,SCN5A,ADCY5,AGTR1,AKT1 |
| hsa04211 | Longevity regulating pathway | 19 | 87 | 0.88 | 4.66E-10 | SIRT1,RPS6KB1,NFKB1,CAT,PIK3CA,IGF1R,PPARG,BAX,INSR,PRKACA,ADCY2,MTOR,AKT2,CREB1,ADIPOQ,HRAS,ADCY5,PIK3R1,AKT1 |
| hsa04658 | Th1 and Th2 cell differentiation | 19 | 87 | 0.88 | 4.66E-10 | MAPK1,NFKB1,IL2,IFNG,MAPK14,IL4,MAPK3,STAT6,FOS,LCK,JAK1,MAPK10,STAT1,JUN,JAK2,PPP3CA,MAPK8,MAPK9,TYK2 |
| hsa05321 | Inflammatory bowel disease | 16 | 60 | 0.96 | 1.10E-09 | TGFB1,NFKB1,IL2,IFNG,IL4,RORA,IL1A,IL1B,STAT3,STAT6,STAT1,JUN,TLR4,IL6,TNF,IL10 |
| hsa05202 | Transcriptional misregulation in cancer | 25 | 171 | 0.7 | 1.18E-09 | PLAT,MPO,NFKB1,FLT3,RARA,MDM2,IGF1R,NCOR1,CCNA2,CSF1R,PPARG,BAX,CXCL8,MET,RUNX2,MMP9,PLAU,HDAC1,IGFBP3,IL6,RUNX1T1,HDAC2,NTRK1,ELANE,MYC |
| hsa04152 | AMPK signaling pathway | 21 | 120 | 0.78 | 1.75E-09 | CFTR,SIRT1,RPS6KB1,CCND1,LIPE,PIK3CA,IGF1R,CCNA2,PPARG,HMGCR,INSR,SLC2A4,PDPK1,SREBF1,MTOR,ADRA1A,AKT2,CREB1,ADIPOQ,PIK3R1,AKT1 |
| hsa05216 | Thyroid cancer | 13 | 36 | 1.09 | 2.35E-09 | MAPK1,CCND1,MAP2K2,MAPK3,PPARG,BRAF,BAX,MAP2K1,CTNNB1,RET,HRAS,NTRK1,MYC |
| hsa04550 | Signaling pathways regulating pluripotency of stem cells | 22 | 140 | 0.73 | 4.01E-09 | MAPK1,MAPK14,BMP4,RAF1,MAP2K2,MAPK3,PIK3CA,STAT3,IGF1R,MAP2K1,GSK3B,FGFR3,JAK1,CTNNB1,JAK2,AKT2,FGFR1,HRAS,FGFR2,PIK3R1,AKT1,MYC |
| hsa05033 | Nicotine addiction | 13 | 38 | 1.07 | 4.01E-09 | GABRA6,GABRB2,GRIA2,GABRB3,GABRA5,CHRNB2,CHRNA4,GABRA3,GRIN1,GRIN2A,GABRA1,GABRA2,GRIA1 |
| hsa05130 | Pathogenic Escherichia coli infection | 25 | 187 | 0.66 | 6.03E-09 | MAPK1,TUBB1,NFKB1,MAPK14,MAPK3,IL1B,BAX,FOS,CXCL8,CYCS,F2,CASP3,CASP9,PTPN11,CASP8,MAPK10,JUN,ABL1,SRC,TLR4,MAPK8,IL6,MAPK9,TNF,CLDN4 |
| hsa04061 | Viral protein interaction with cytokine and cytokine receptor | 18 | 96 | 0.81 | 1.12E-08 | CCL2,IL2,CSF1R,CCR2,CCR5,CXCR1,CCR1,CXCL10,CXCL8,CXCR2,CCR4,CCR9,CXCR3,IL6,CXCR4,TNF,IL10,CCR3 |
| hsa04150 | mTOR signaling pathway | 22 | 151 | 0.7 | 1.38E-08 | MAPK1,RPS6KB1,RAF1,MAP2K2,MAPK3,PRKCG,PIK3CA,IGF1R,BRAF,MAP2K1,INSR,GSK3B,PDPK1,MTOR,SGK1,AKT2,TNF,HRAS,PRKCA,PIK3R1,RPS6KA1,AKT1 |
| hsa04724 | Glutamatergic synapse | 19 | 111 | 0.77 | 1.54E-08 | MAPK1,MAPK3,PRKCG,SLC1A3,GRIA2,GRM5,PRKACA,ADRBK1,ADCY2,GRM1,PLA2G4A,GRIN1,PPP3CA,GRM2,GRIN2A,PRKCA,ADCY5,GRIA1,GRM4 |
| hsa05204 | Chemical carcinogenesis | 16 | 75 | 0.87 | 1.66E-08 | CYP2C9,UGT2B7,ADH1B,GSTM1,CYP3A4,CYP1A2,HSD11B1,PTGS2,CYP2C19,UGT1A1,CYP1A1,GSTP1,ALDH3A1,ADH1C,CYP1B1,EPHX1 |
| hsa05020 | Prion disease | 29 | 265 | 0.58 | 1.92E-08 | MAPK1,TUBB1,MAPK14,MAPK3,IL1A,IL1B,PIK3CA,SOD1,NCF1,BAX,EIF2AK3,CYCS,PRKACA,CASP3,GSK3B,CASP9,CAV1,MAPK10,CACNA1S,GRIN1,PRKCD,PPP3CA,MAPK8,GRIN2A,IL6,CREB1,MAPK9,TNF,PIK3R1 |
| hsa05143 | African trypanosomiasis | 12 | 36 | 1.06 | 2.11E-08 | IFNG,IL1B,PRKCG,ICAM1,VCAM1,SELE,TLR9,IL6,TNF,PRKCA,IL10,IDO1 |
| hsa04713 | Circadian entrainment | 17 | 92 | 0.8 | 3.56E-08 | MAPK1,MTNR1B,MAPK3,PRKCG,GRIA2,MTNR1A,FOS,PRKACA,ADCY2,GRIN1,CAMK2B,GRIN2A,CREB1,PRKCA,ADCY5,GRIA1,NOS1 |
| hsa00980 | Metabolism of xenobiotics by cytochrome P450 | 15 | 69 | 0.87 | 3.90E-08 | CYP2C9,UGT2B7,ADH1B,GSTM1,CYP3A4,CYP1A2,HSD11B1,UGT1A1,CYP1A1,AKR1C1,GSTP1,ALDH3A1,ADH1C,CYP1B1,EPHX1 |
| hsa04920 | Adipocytokine signaling pathway | 15 | 69 | 0.87 | 3.90E-08 | NFKB1,STAT3,SLC2A4,PTPN11,MAPK10,MTOR,JAK2,AKT2,MAPK8,PPARA,ADIPOQ,MAPK9,TNF,SLC2A1,AKT1 |
| hsa04360 | Axon guidance | 23 | 177 | 0.65 | 4.06E-08 | MAPK1,RAF1,MAPK3,PIK3CA,EPHA4,SHH,MET,GSK3B,LIMK1,LIMK2,PTPN11,ABL1,SRC,EPHB2,EPHA6,PPP3CA,CAMK2B,EPHB1,CXCR4,HRAS,PRKCA,CDK5,PIK3R1 |
| hsa04670 | Leukocyte transendothelial migration | 18 | 109 | 0.75 | 6.05E-08 | MMP2,MAPK14,PRKCG,PIK3CA,ICAM1,NCF1,VCAM1,PTPN11,CTNNB1,ITGAL,MMP9,ITGA4,ITGB2,CXCR4,ITK,PRKCA,CLDN4,PIK3R1 |
| hsa05323 | Rheumatoid arthritis | 16 | 85 | 0.81 | 7.40E-08 | TGFB1,CCL2,IFNG,IL1A,IL1B,ICAM1,FOS,CXCL8,MMP1,ITGAL,JUN,TLR4,ITGB2,IL6,TNF,VEGFA |
| hsa04064 | NF-kappa B signaling pathway | 17 | 101 | 0.76 | 1.16E-07 | NFKB1,IL1B,ICAM1,VCAM1,CXCL8,LCK,PARP1,PTGS2,CD40LG,XIAP,PLAU,TLR4,SYK,BCL2,TNF,LYN,BTK |
| hsa04922 | Glucagon signaling pathway | 17 | 101 | 0.76 | 1.16E-07 | SIRT1,GCK,CREBBP,EP300,PRKACA,SLC2A2,ADCY2,AKT2,PPP3CA,CAMK2B,GCGR,PPARA,CREB1,SLC2A1,LDHA,AKT1,PHKG2 |
| hsa05134 | Legionellosis | 13 | 55 | 0.91 | 1.50E-07 | NFKB1,IL1B,CXCL8,CYCS,CASP3,CASP9,CASP8,VCP,TLR4,ITGB2,IL6,TNF,HSF1 |
| hsa04520 | Adherens junction | 14 | 67 | 0.86 | 1.75E-07 | MAPK1,CREBBP,MAPK3,EP300,IGF1R,ERBB2,EGFR,INSR,MET,CTNNB1,PTPRF,SRC,TGFBR1,FGFR1 |
| hsa04960 | Aldosterone-regulated sodium reabsorption | 11 | 37 | 1.01 | 2.24E-07 | MAPK1,MAPK3,PRKCG,PIK3CA,INSR,HSD11B2,PDPK1,NR3C2,SGK1,PRKCA,PIK3R1 |
| hsa04742 | Taste transduction | 15 | 81 | 0.8 | 2.35E-07 | CHRM3,P2RX3,GABRA6,PRKACA,HTR1A,GABRA5,GRM1,HTR1B,GABRA3,HTR1D,SCN2A,SCN9A,GABRA1,GABRA2,GRM4 |
| hsa04925 | Aldosterone synthesis and secretion | 16 | 95 | 0.76 | 2.77E-07 | LIPE,SCARB1,PRKCG,PRKCE,PRKACA,CYP11B2,PDE2A,ADCY2,CACNA1S,CAMK2B,CREB1,PRKCA,ADCY5,AGTR1,KCNK9,LDLR |
| hsa04215 | Apoptosis - multiple species | 10 | 30 | 1.06 | 3.56E-07 | BAX,CYCS,CASP3,CASP9,CASP8,MAPK10,XIAP,MAPK8,BCL2,MAPK9 |
| hsa04727 | GABAergic synapse | 15 | 86 | 0.78 | 4.61E-07 | PRKCG,GABRA6,GABRB2,GABRB3,PRKACA,GABRA5,ADCY2,CACNA1S,GABRA3,SRC,ABAT,GABRA1,PRKCA,ADCY5,GABRA2 |
| hsa04614 | Renin-angiotensin system | 9 | 23 | 1.13 | 5.03E-07 | CTSG,LNPEP,CMA1,ACE,ANPEP,PREP,AGTR2,MME,AGTR1 |
| hsa00982 | Drug metabolism - cytochrome P450 | 13 | 64 | 0.84 | 6.61E-07 | CYP2C9,UGT2B7,ADH1B,GSTM1,CYP3A4,MAOA,CYP1A2,CYP2C19,UGT1A1,MAOB,GSTP1,ALDH3A1,ADH1C |
| hsa04976 | Bile secretion | 15 | 89 | 0.76 | 6.70E-07 | CFTR,SCARB1,CA2,HMGCR,UGT2B7,PRKACA,CYP3A4,ADCY2,UGT1A1,SLC2A1,ADCY5,NR1H4,LDLR,ABCB1,EPHX1 |
| hsa04924 | Renin secretion | 13 | 66 | 0.83 | 8.90E-07 | PTGER2,ACE,ADRB2,PRKACA,EDNRA,ADRB3,CACNA1S,ADORA1,ADRB1,PPP3CA,CREB1,ADCY5,AGTR1 |
| hsa05416 | Viral myocarditis | 12 | 55 | 0.88 | 9.72E-07 | CCND1,ICAM1,CYCS,CASP3,CASP9,CAV1,ITGAL,CASP8,CD40LG,ABL1,ITGB2,PRF1 |
| hsa05017 | Spinocerebellar ataxia | 18 | 135 | 0.66 | 9.85E-07 | XBP1,RORA,PRKCG,PIK3CA,GRIA2,CYCS,MAPK10,MTOR,GRM1,GRIN1,AKT2,MAPK8,GRIN2A,MAPK9,PRKCA,PIK3R1,GRIA1,AKT1 |
| hsa00350 | Tyrosine metabolism | 10 | 35 | 0.99 | 1.12E-06 | MIF,TYR,PNMT,ADH1B,AOC3,MAOA,COMT,MAOB,ALDH3A1,ADH1C |
| hsa04060 | Cytokine-cytokine receptor interaction | 26 | 282 | 0.5 | 2.16E-06 | TGFB1,CCL2,IL2,IFNG,IL4,BMP4,IL1A,IL1B,CSF1R,CCR2,CCR5,CXCR1,CCR1,CXCL10,CXCL8,CXCR2,CCR4,CCR9,CD40LG,CXCR3,TGFBR1,IL6,CXCR4,TNF,IL10,CCR3 |
| hsa04971 | Gastric acid secretion | 13 | 73 | 0.79 | 2.38E-06 | CFTR,CHRM3,ATP4A,PRKCG,CA2,PRKACA,CCKBR,ADCY2,SSTR2,MYLK,CAMK2B,PRKCA,ADCY5 |
| hsa00590 | Arachidonic acid metabolism | 12 | 61 | 0.83 | 2.47E-06 | LTA4H,CYP2C9,PLB1,PTGS1,PLA2G4A,PTGS2,CYP2C19,ALOX5,AKR1C3,PLA2G2A,EPHX2,ALOX15 |
| hsa04970 | Salivary secretion | 14 | 89 | 0.73 | 3.36E-06 | CD38,CHRM3,PRKCG,ADRB2,ADRA1B,PRKACA,ADCY2,ADRB3,ADRB1,ADRA1D,ADRA1A,PRKCA,ADCY5,NOS1 |
| hsa04110 | Cell cycle | 16 | 120 | 0.66 | 4.23E-06 | TGFB1,CCND1,MDM2,CREBBP,EP300,CDK2,RB1,CCNA2,YWHAG,GSK3B,E2F1,E2F2,ABL1,HDAC1,HDAC2,MYC |
| hsa04640 | Hematopoietic cell lineage | 14 | 91 | 0.72 | 4.23E-06 | CD38,IL4,FLT3,IL1A,IL1B,FCER2,CSF1R,KIT,ANPEP,ITGA4,IL6,TNF,MME,ITGB3 |
| hsa05012 | Parkinson disease | 23 | 240 | 0.52 | 4.95E-06 | XBP1,TUBB1,SLC6A3,BAX,SLC18A2,LRRK2,EIF2AK3,CYCS,PRKACA,CASP3,CASP9,ADORA2A,SNCA,MAOA,MAPT,MAPK10,DRD2,MAOB,DRD1,MAPK8,CAMK2B,MAPK9,ADCY5 |
| hsa04911 | Insulin secretion | 13 | 82 | 0.74 | 7.28E-06 | GCK,CHRM3,PRKCG,PRKACA,SLC2A2,ADCY2,CACNA1S,CAMK2B,CREB1,PRKCA,SLC2A1,ADCY5,KCNN3 |
| hsa00983 | Drug metabolism - other enzymes | 12 | 75 | 0.74 | 1.61E-05 | MPO,TK2,GUSB,UGT2B7,GSTM1,CYP3A4,IMPDH1,CES1,UGT1A1,XDH,TYMP,GSTP1 |
| hsa04114 | Oocyte meiosis | 15 | 120 | 0.63 | 1.77E-05 | MAPK1,AURKA,MAPK14,MAPK3,CDK2,IGF1R,MAP2K1,YWHAG,PRKACA,ADCY2,AR,PPP3CA,CAMK2B,ADCY5,RPS6KA1 |
| hsa00591 | Linoleic acid metabolism | 8 | 29 | 0.98 | 1.94E-05 | CYP2C9,PLB1,CYP3A4,CYP1A2,PLA2G4A,CYP2C19,PLA2G2A,ALOX15 |
| hsa04310 | Wnt signaling pathway | 17 | 154 | 0.58 | 1.97E-05 | CCND1,MMP7,CREBBP,EP300,PRKCG,PRKACA,GSK3B,PSEN1,CTNNB1,MAPK10,JUN,PPP3CA,MAPK8,CAMK2B,MAPK9,PRKCA,MYC |
| hsa04330 | Notch signaling pathway | 10 | 52 | 0.82 | 2.27E-05 | CREBBP,EP300,KAT2B,NCSTN,ADAM17,PSEN1,PSEN2,HDAC1,HDAC2,PSENEN |
| hsa04927 | Cortisol synthesis and secretion | 11 | 65 | 0.76 | 2.37E-05 | SCARB1,PDE8B,CYP11B1,PRKACA,ADCY2,CACNA1S,CYP17A1,CREB1,ADCY5,AGTR1,LDLR |
| hsa04672 | Intestinal immune network for IgA production | 9 | 43 | 0.86 | 3.50E-05 | TGFB1,IL2,IL4,CCR9,CD40LG,ITGA4,IL6,CXCR4,IL10 |
| hsa04622 | RIG-I-like receptor signaling pathway | 11 | 70 | 0.73 | 4.37E-05 | NFKB1,MAPK14,CXCL10,CXCL8,TBK1,CASP8,MAPK10,MAPK8,MAPK9,TNF,IKBKE |
| hsa05016 | Huntington disease | 24 | 298 | 0.44 | 4.37E-05 | TUBB1,CREBBP,EP300,SLC1A3,SOD1,PPARG,BAX,GRIA2,GRM5,CYCS,CASP3,CASP9,HTT,CASP8,MAPK10,MTOR,TGM2,GRIN1,HDAC1,MAPK8,CREB1,MAPK9,GRIA1,HDAC2 |
| hsa04115 | p53 signaling pathway | 11 | 72 | 0.72 | 5.47E-05 | SERPINE1,CCND1,MDM2,CDK2,BAX,CYCS,CASP3,CASP9,CASP8,IGFBP3,BCL2 |
| hsa04918 | Thyroid hormone synthesis | 11 | 74 | 0.71 | 6.83E-05 | GSR,TTR,PRKCG,ALB,HSP90B1,PRKACA,ADCY2,CREB1,PRKCA,ADCY5,DUOX2 |
| hsa00330 | Arginine and proline metabolism | 9 | 48 | 0.81 | 7.35E-05 | ODC1,ALDH2,NOS3,NOS2,MAOA,ARG1,OAT,MAOB,NOS1 |
| hsa04137 | Mitophagy - animal | 10 | 63 | 0.74 | 9.50E-05 | EIF2AK3,TBK1,E2F1,MAPK10,JUN,SRC,MAPK8,MAPK9,HRAS,HIF1A |
| hsa00010 | Glycolysis / Gluconeogenesis | 10 | 65 | 0.72 | 0.00012 | GCK,ALDH2,HK2,ADH1B,AKR1A1,PGK1,HK1,ALDH3A1,ADH1C,LDHA |
| hsa05414 | Dilated cardiomyopathy | 12 | 95 | 0.64 | 0.00012 | TGFB1,TNNC1,ITGAV,PRKACA,TNNI3,ADCY2,CACNA1S,ADRB1,ITGA4,TNF,ADCY5,ITGB3 |
| hsa00380 | Tryptophan metabolism | 8 | 41 | 0.83 | 0.00016 | CAT,ALDH2,MAOA,CYP1A2,MAOB,CYP1A1,IDO1,CYP1B1 |
| hsa01523 | Antifolate resistance | 7 | 31 | 0.89 | 0.0002 | NFKB1,IL1B,TYMS,ABCC1,IL6,DHFR,TNF |
| hsa05168 | Herpes simplex virus 1 infection | 30 | 479 | 0.33 | 0.00033 | CCL2,NFKB1,IFNG,EIF2AK2,IL1B,PIK3CA,BAX,EIF2AK3,CYCS,CASP3,TBK1,CASP9,PTPN11,JAK1,CASP8,TLR9,STAT1,MTOR,SRC,SYK,JAK2,AKT2,BCL2,IL6,TNF,PIK3R1,TYK2,AKT1,ITGB3,IKBKE |
| hsa05330 | Allograft rejection | 7 | 34 | 0.85 | 0.00033 | IL2,IFNG,IL4,CD40LG,PRF1,TNF,IL10 |
| hsa04350 | TGF-beta signaling pathway | 11 | 91 | 0.62 | 0.00035 | MAPK1,TGFB1,RPS6KB1,IFNG,BMP4,CREBBP,MAPK3,EP300,TGFBR1,TNF,MYC |
| hsa00230 | Purine metabolism | 13 | 127 | 0.55 | 0.00042 | PDE8B,PDE4B,PDE2A,ADCY2,IMPDH1,PDE4D,PDE5A,ENPP1,ADA,XDH,PDE4A,ADCY5,PDE10A |
| hsa05332 | Graft-versus-host disease | 7 | 36 | 0.83 | 0.00044 | IL2,IFNG,IL1A,IL1B,IL6,PRF1,TNF |
| hsa05014 | Amyotrophic lateral sclerosis | 24 | 352 | 0.37 | 0.00046 | XBP1,TUBB1,MAPK14,CAT,SOD1,SIGMAR1,BAX,GRIA2,EIF2AK3,CYCS,CASP3,NOS2,TBK1,CASP9,ERBB4,VCP,MTOR,GRIN1,PPP3CA,GRIN2A,BCL2,TNF,GRIA1,NOS1 |
| hsa04610 | Complement and coagulation cascades | 10 | 82 | 0.62 | 0.00064 | PLAT,SERPINE1,F2,PLG,F3,PLAU,F10,F7,THBD,ITGB2 |
| hsa00360 | Phenylalanine metabolism | 5 | 17 | 1 | 0.00074 | MIF,AOC3,MAOA,MAOB,ALDH3A1 |
| hsa04144 | Endocytosis | 18 | 241 | 0.41 | 0.001 | PDGFRA,MDM2,IGF1R,EGFR,CCR5,CXCR1,ADRBK1,CXCR2,CAV1,FGFR3,SRC,TGFBR1,CXCR4,HRAS,FGFR2,GRK6,LDLR,PIP5K1C |
| hsa05410 | Hypertrophic cardiomyopathy | 10 | 89 | 0.59 | 0.0011 | TGFB1,TNNC1,ITGAV,ACE,TNNI3,CACNA1S,ITGA4,IL6,TNF,ITGB3 |
| hsa04973 | Carbohydrate digestion and absorption | 7 | 44 | 0.74 | 0.0013 | PIK3CA,HK2,SLC2A2,AKT2,HK1,PIK3R1,AKT1 |
| hsa03320 | PPAR signaling pathway | 9 | 75 | 0.62 | 0.0014 | FABP4,PPARG,FABP5,MMP1,PDPK1,FABP3,PPARA,ADIPOQ,NR1H3 |
| hsa04714 | Thermogenesis | 17 | 229 | 0.41 | 0.0015 | RPS6KB1,MAPK14,LIPE,MGLL,SMARCA2,PPARG,PRKACA,ADCY2,ADRB3,MTOR,CNR1,KDM1A,CREB1,FGFR1,HRAS,ADCY5,RPS6KA1 |
| hsa00830 | Retinol metabolism | 8 | 64 | 0.63 | 0.0022 | CYP2C9,UGT2B7,ADH1B,CYP3A4,CYP1A2,UGT1A1,CYP1A1,ADH1C |
| hsa04972 | Pancreatic secretion | 10 | 98 | 0.55 | 0.0022 | CFTR,CD38,CHRM3,PRKCG,CA2,PRSS1,ADCY2,PLA2G2A,PRKCA,ADCY5 |
| hsa00524 | Neomycin, kanamycin and gentamicin biosynthesis | 3 | 5 | 1.31 | 0.0026 | GCK,HK2,HK1 |
| hsa04977 | Vitamin digestion and absorption | 5 | 24 | 0.86 | 0.0027 | APOB,FOLH1,SCARB1,PLB1,ABCC1 |
| hsa00480 | Glutathione metabolism | 7 | 53 | 0.66 | 0.0033 | GSR,ODC1,ANPEP,GSTM1,G6PD,GSTP1,IDH1 |
| hsa04940 | Type I diabetes mellitus | 6 | 39 | 0.72 | 0.0035 | IL2,IFNG,IL1A,IL1B,PRF1,TNF |
| hsa04141 | Protein processing in endoplasmic reticulum | 13 | 165 | 0.43 | 0.0038 | XBP1,EIF2AK2,BAX,HSP90B1,EIF2AK3,HSP90AA1,VCP,MAPK10,MAPK8,PLAA,BCL2,MAPK9,CAPN1 |
| hsa04340 | Hedgehog signaling pathway | 6 | 47 | 0.64 | 0.0082 | CCND1,SHH,PRKACA,ADRBK1,GSK3B,BCL2 |
| hsa00040 | Pentose and glucuronate interconversions | 5 | 33 | 0.72 | 0.0091 | AKR1B1,GUSB,UGT2B7,AKR1A1,UGT1A1 |
| hsa00220 | Arginine biosynthesis | 4 | 21 | 0.82 | 0.0109 | NOS3,NOS2,ARG1,NOS1 |
| hsa00340 | Histidine metabolism | 4 | 21 | 0.82 | 0.0109 | ALDH2,MAOA,MAOB,ALDH3A1 |
| hsa05150 | Staphylococcus aureus infection | 8 | 86 | 0.5 | 0.0112 | ICAM1,PLG,ITGAL,PTAFR,ITGB2,IL10,FPR2,FPR1 |
| hsa04390 | Hippo signaling pathway | 11 | 153 | 0.39 | 0.0152 | TGFB1,SERPINE1,CCND1,BMP4,YWHAG,GSK3B,CTNNB1,RASSF1,TGFBR1,ITGB2,MYC |
| hsa04530 | Tight junction | 11 | 156 | 0.38 | 0.0173 | CFTR,CCND1,ERBB2,PRKCE,PRKACA,MAPK10,JUN,SRC,MAPK8,MAPK9,CLDN4 |
| hsa00790 | Folate biosynthesis | 4 | 25 | 0.74 | 0.0183 | AKR1B1,ALPL,AKR1C3,DHFR |
| hsa04514 | Cell adhesion molecules | 10 | 137 | 0.4 | 0.0193 | ITGAV,ICAM1,VCAM1,SELE,ITGAL,PTPRF,CD40LG,ITGA4,ITGB2,CLDN4 |
| hsa00860 | Porphyrin and chlorophyll metabolism | 5 | 41 | 0.62 | 0.0198 | HMOX1,GUSB,UGT2B7,PPOX,UGT1A1 |
| hsa05310 | Asthma | 4 | 27 | 0.71 | 0.0229 | IL4,CD40LG,TNF,IL10 |
| hsa04623 | Cytosolic DNA-sensing pathway | 6 | 62 | 0.52 | 0.026 | NFKB1,IL1B,CXCL10,TBK1,IL6,IKBKE |
| hsa00410 | beta-Alanine metabolism | 4 | 29 | 0.68 | 0.0282 | ALDH2,AOC3,ABAT,ALDH3A1 |
| hsa00052 | Galactose metabolism | 4 | 30 | 0.66 | 0.0311 | GCK,AKR1B1,HK2,HK1 |
| hsa00232 | Caffeine metabolism | 2 | 5 | 1.14 | 0.0316 | CYP1A2,XDH |
| hsa04979 | Cholesterol metabolism | 5 | 48 | 0.55 | 0.0344 | APOB,SCARB1,LPA,TSPO,LDLR |
| hsa05320 | Autoimmune thyroid disease | 5 | 48 | 0.55 | 0.0344 | IL2,IL4,CD40LG,PRF1,IL10 |
| hsa00051 | Fructose and mannose metabolism | 4 | 32 | 0.63 | 0.0372 | AKR1B1,HK2,MPI,HK1 |
| hsa00500 | Starch and sucrose metabolism | 4 | 32 | 0.63 | 0.0372 | GCK,HK2,ENPP1,HK1 |
| hsa05100 | Bacterial invasion of epithelial cells | 6 | 70 | 0.47 | 0.0415 | PIK3CA,MET,CAV1,CTNNB1,SRC,PIK3R1 |
| hsa05322 | Systemic lupus erythematosus | 7 | 93 | 0.41 | 0.047 | CTSG,IFNG,CD40LG,GRIN2A,TNF,IL10,ELANE |
| hsa04961 | Endocrine and other factor-regulated calcium reabsorption | 5 | 53 | 0.51 | 0.0477 | PRKCG,PRKACA,ESR1,PRKCA,VDR |
